# Supplementary material for: Indium-Catalyzed Direct Conversion of Lactones into Thiolactones Using a Disilathiane as a Sulfur Source
Source: Preprints.org preprint supplement (doi:10.20944/preprints201805.0246.v1), 2018-05-17

**Supplementary Materials**  
**for**  
**Indium-Catalyzed Direct Conversion of Lactones into Thiolactones**  
**Using a Disilathiane as a Sulfur Source**

Yohei Ogiwara, Ken Takano, Shuhei Horikawa, and Norio Sakai\*

*Department of Pure and Applied Chemistry, Faculty of Science and Technology  
Tokyo University of Science, 2641 Yamazaki, Noda, Chiba 278-8510, Japan*

sakachem@rs.noda.tus.ac.jp

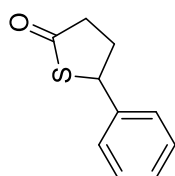

2a

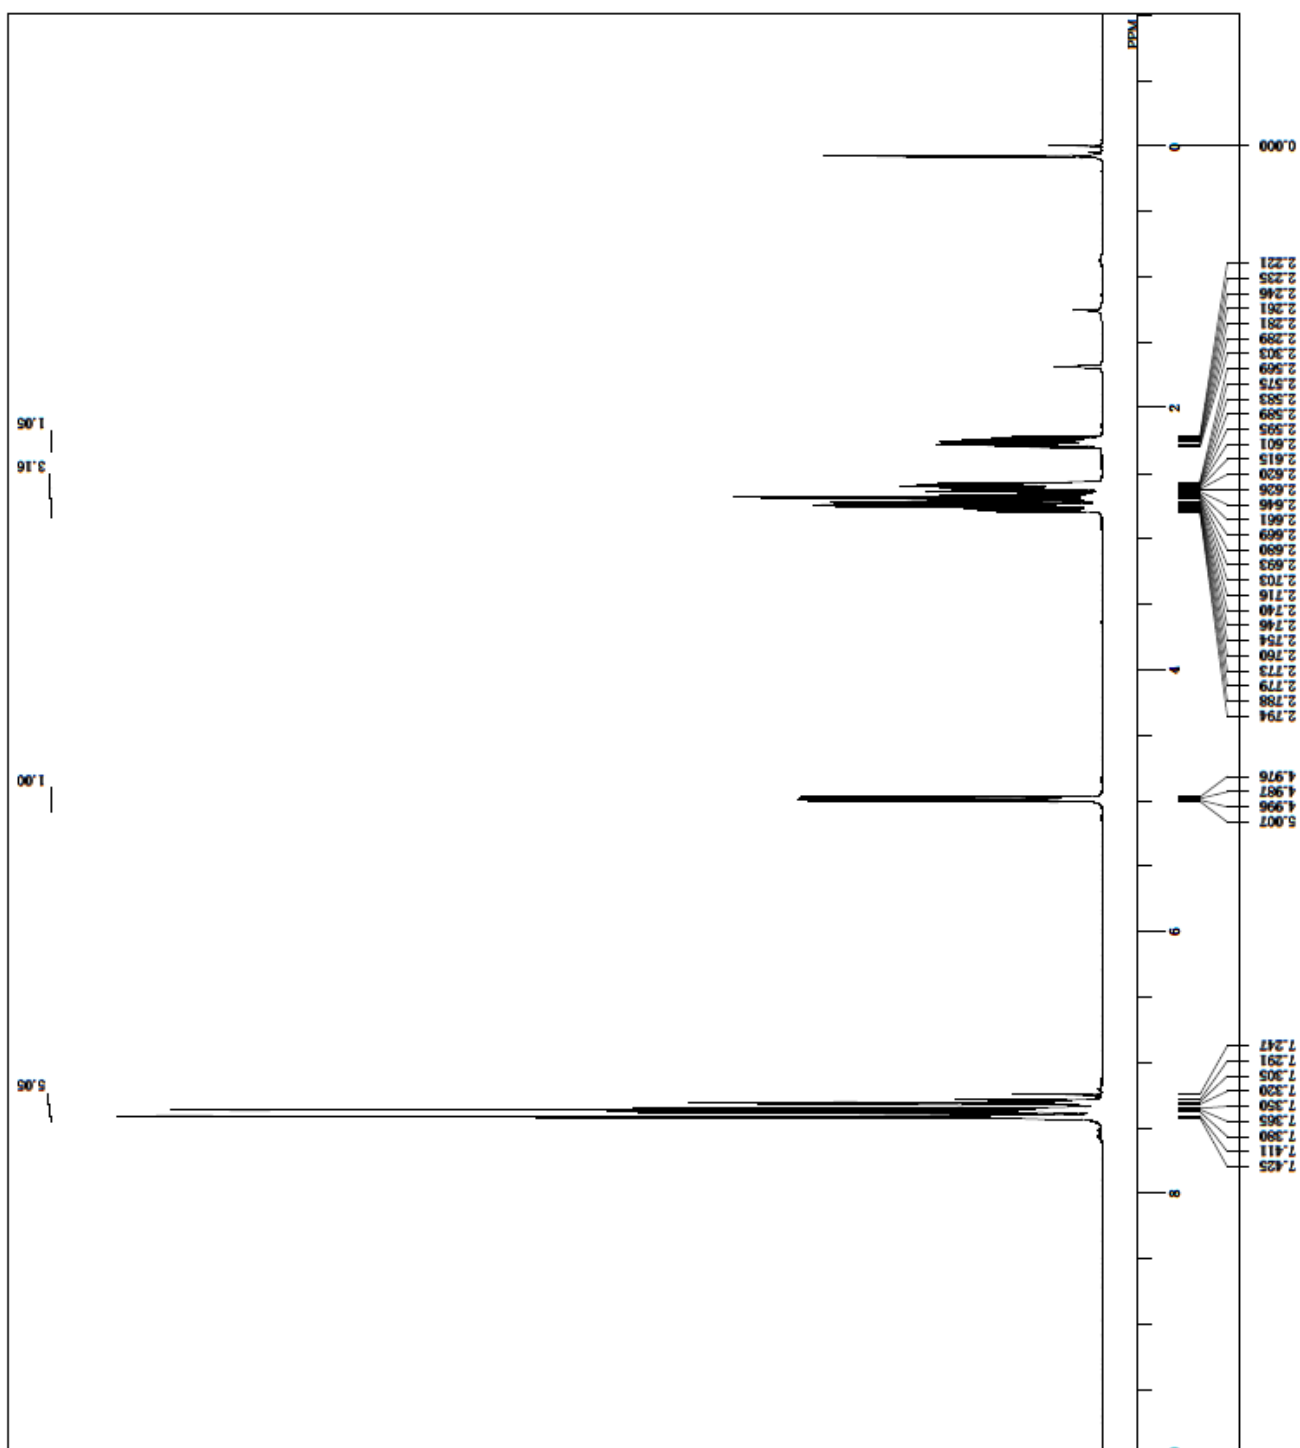

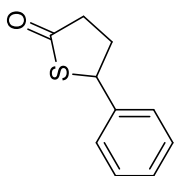

2a

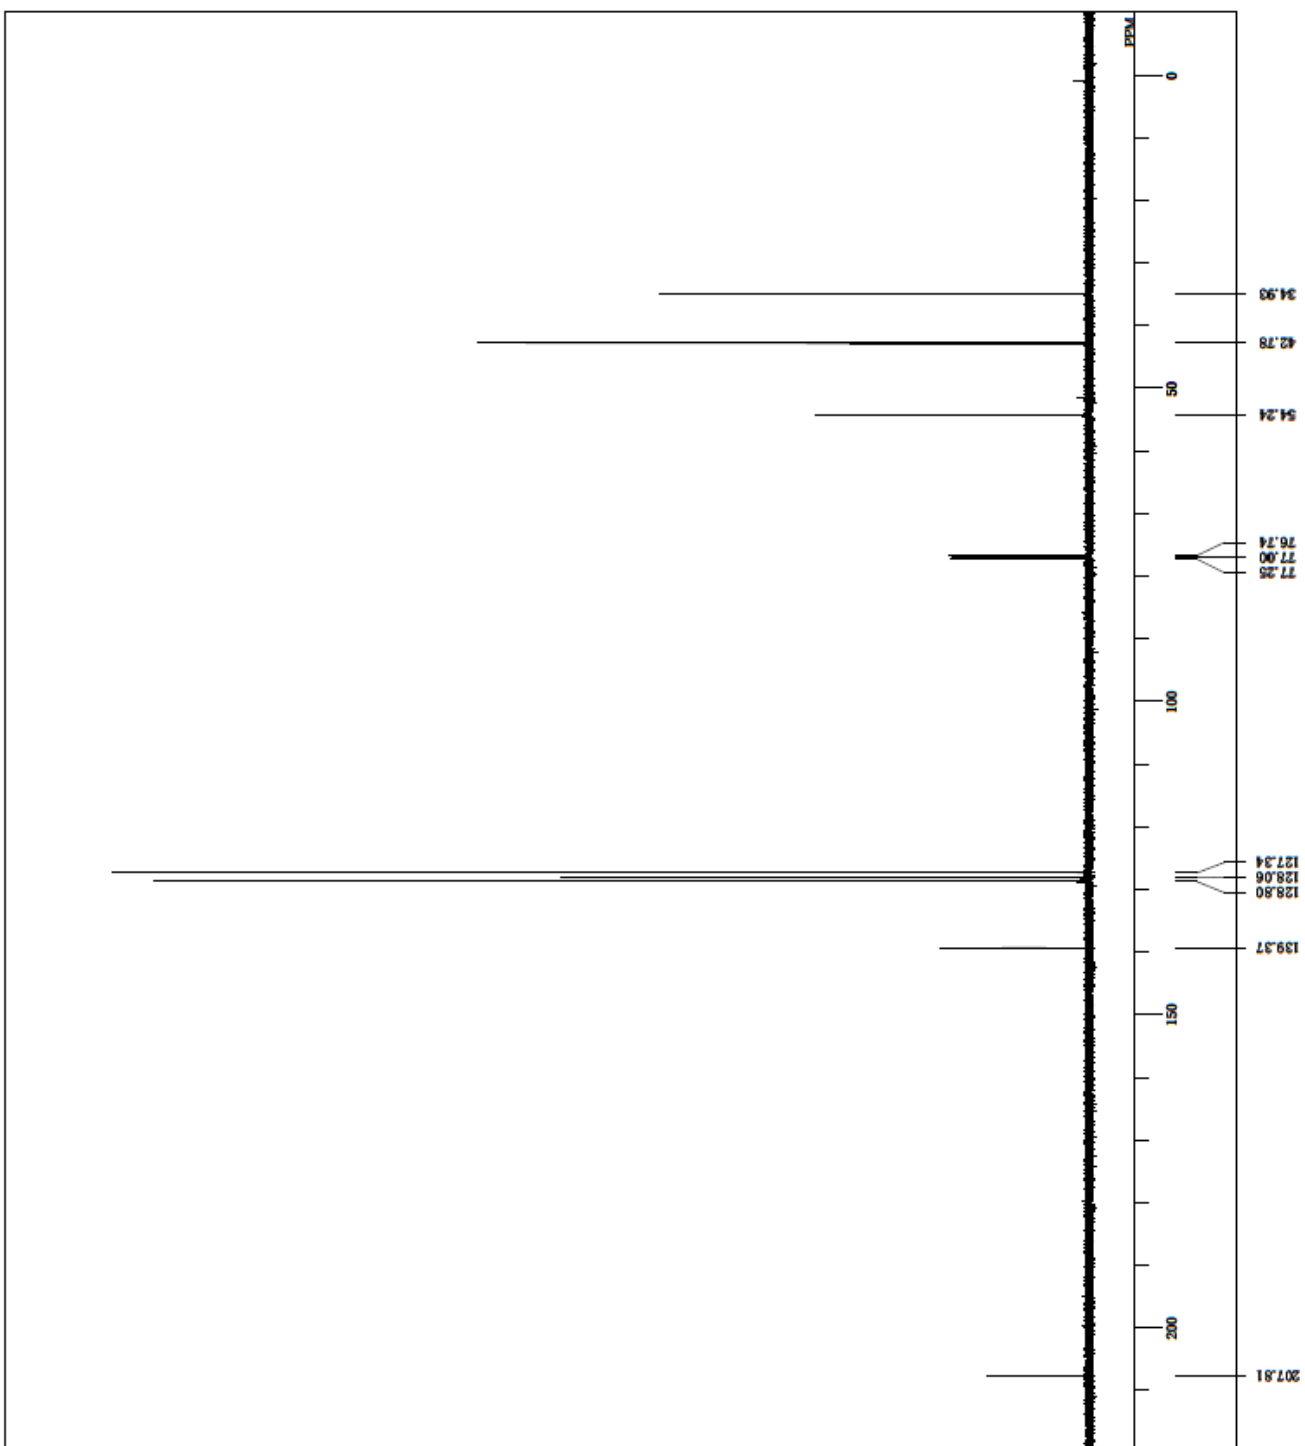

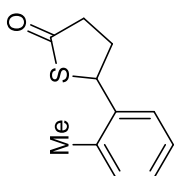

2b

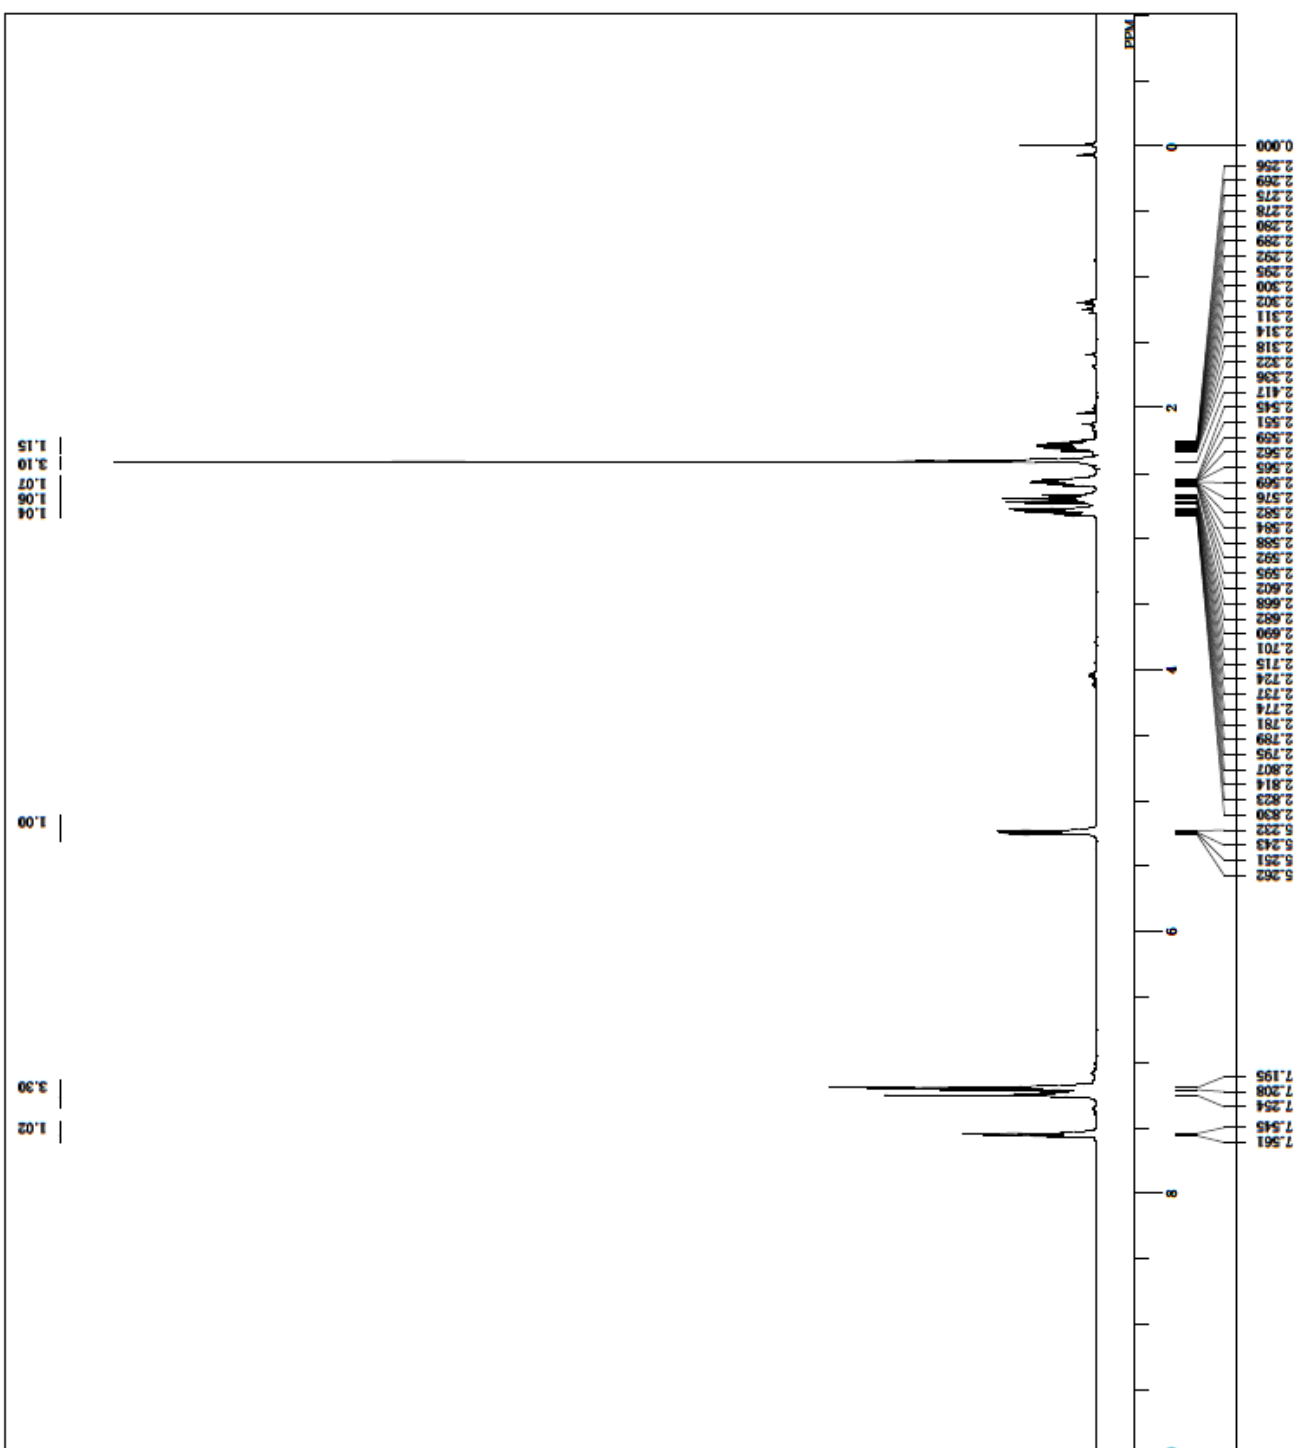

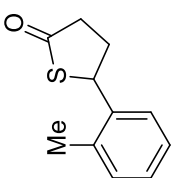

2b

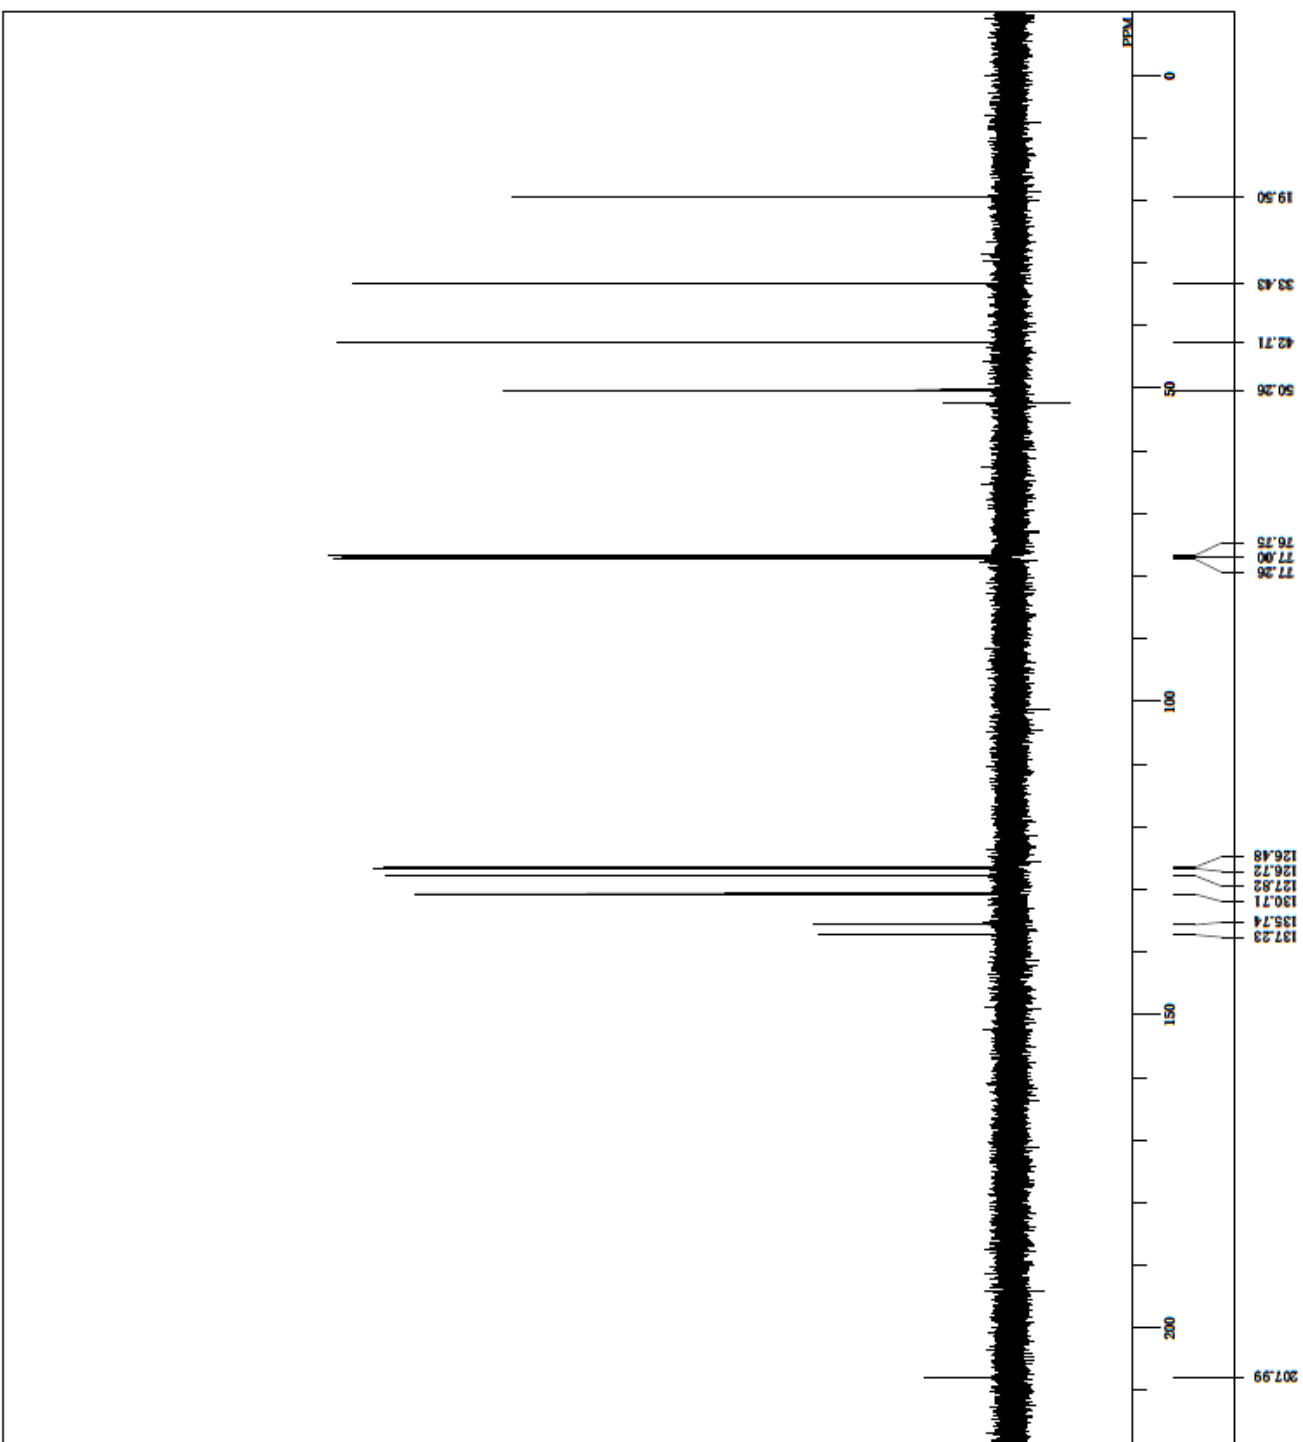

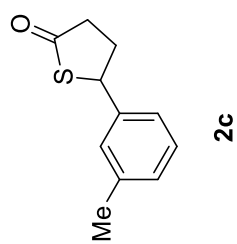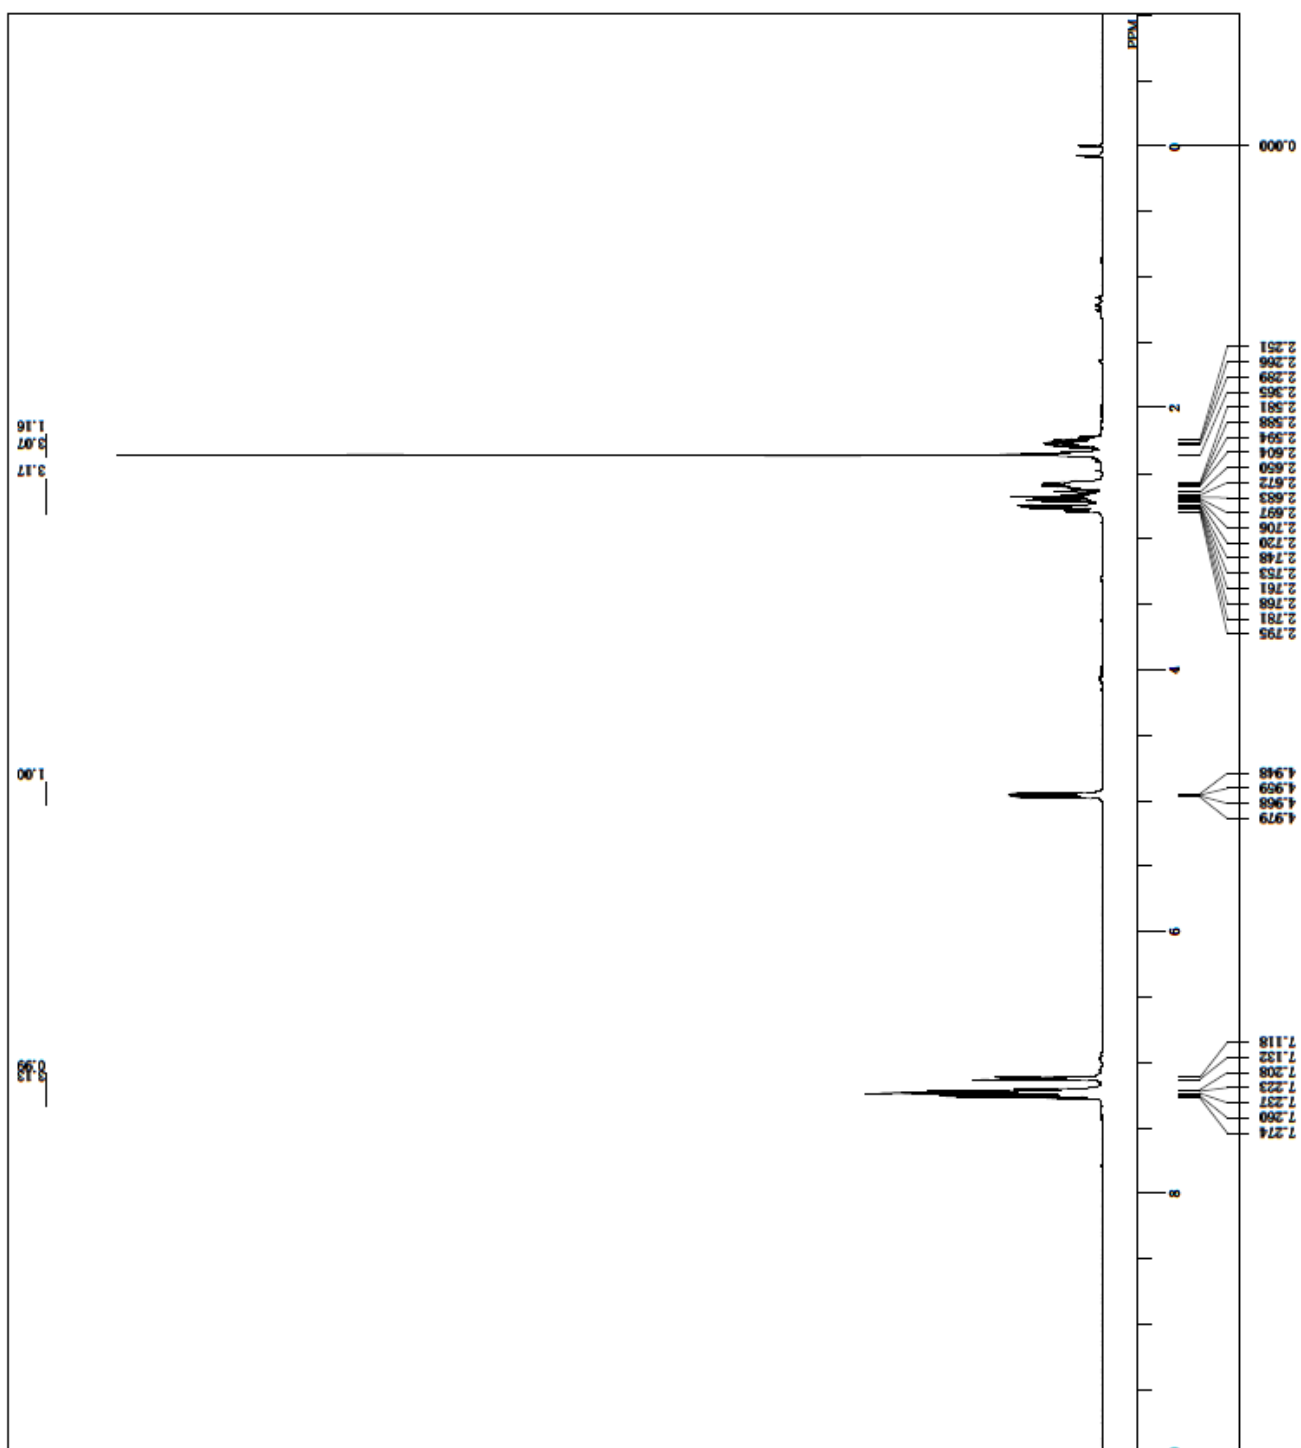

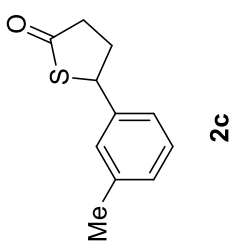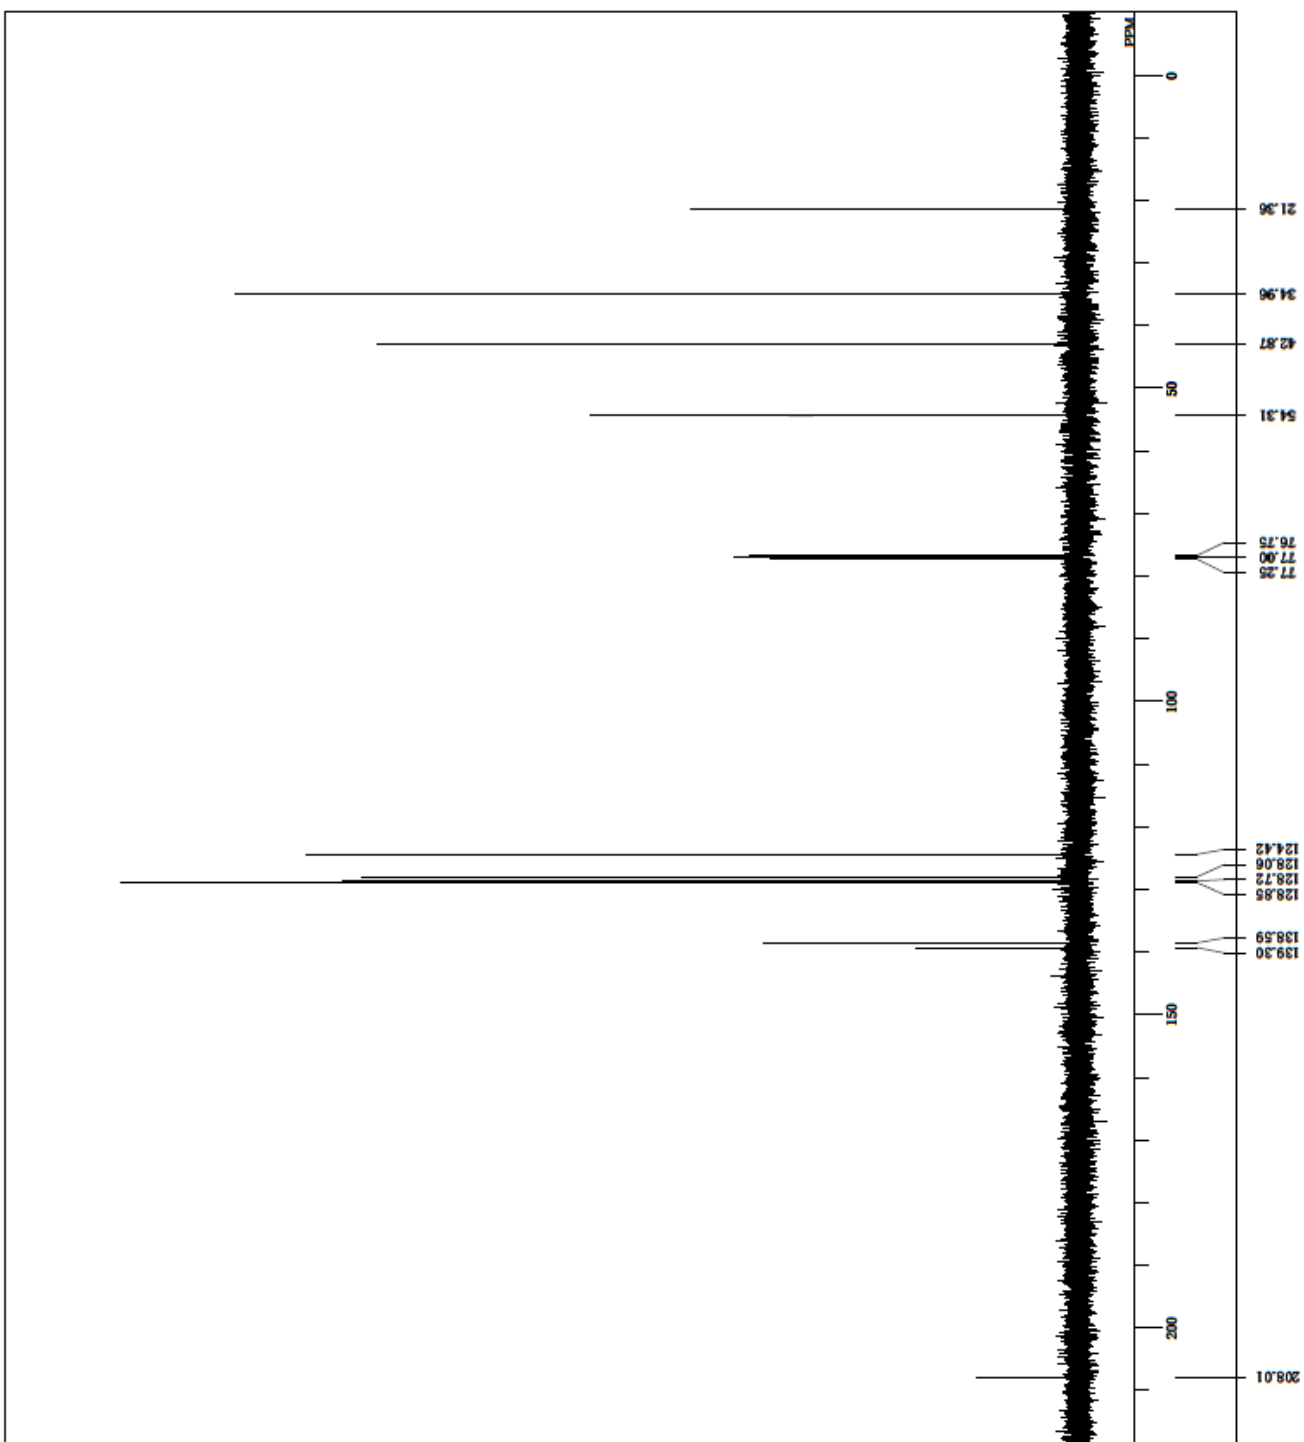

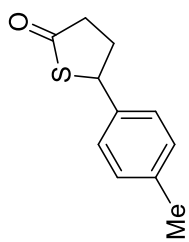

2d

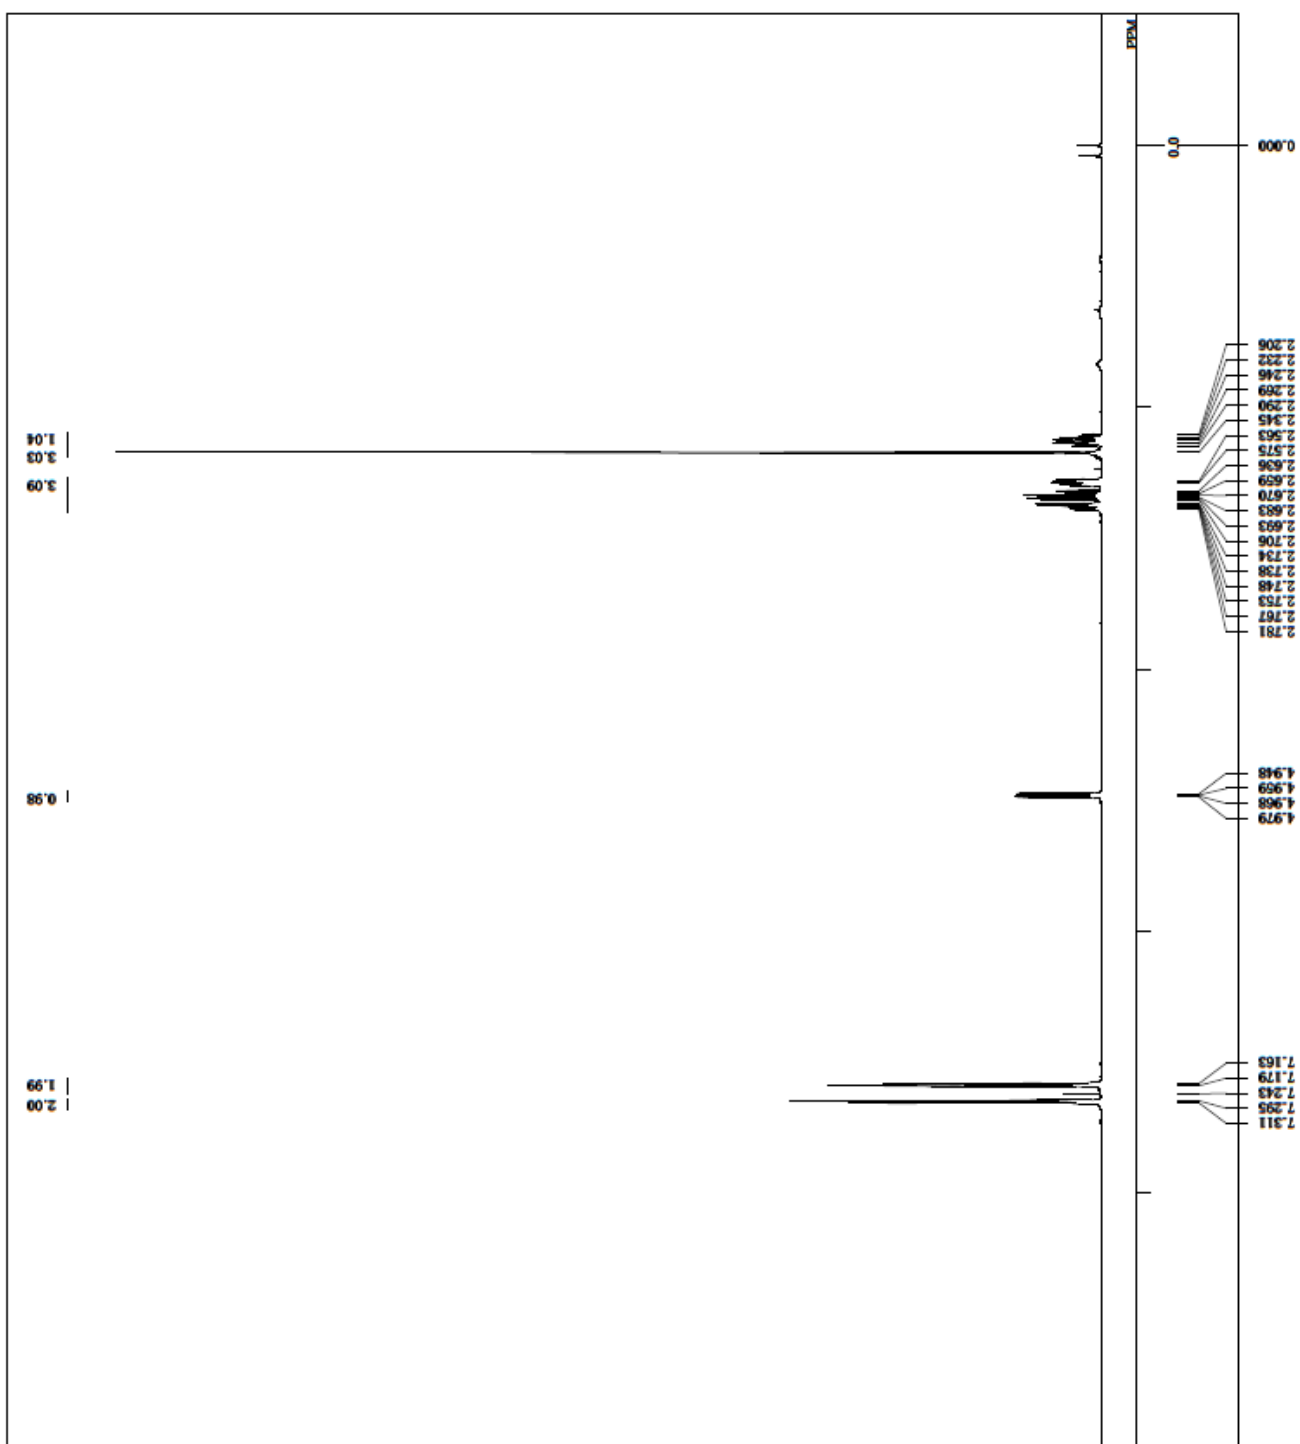



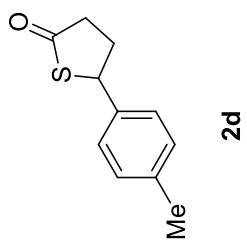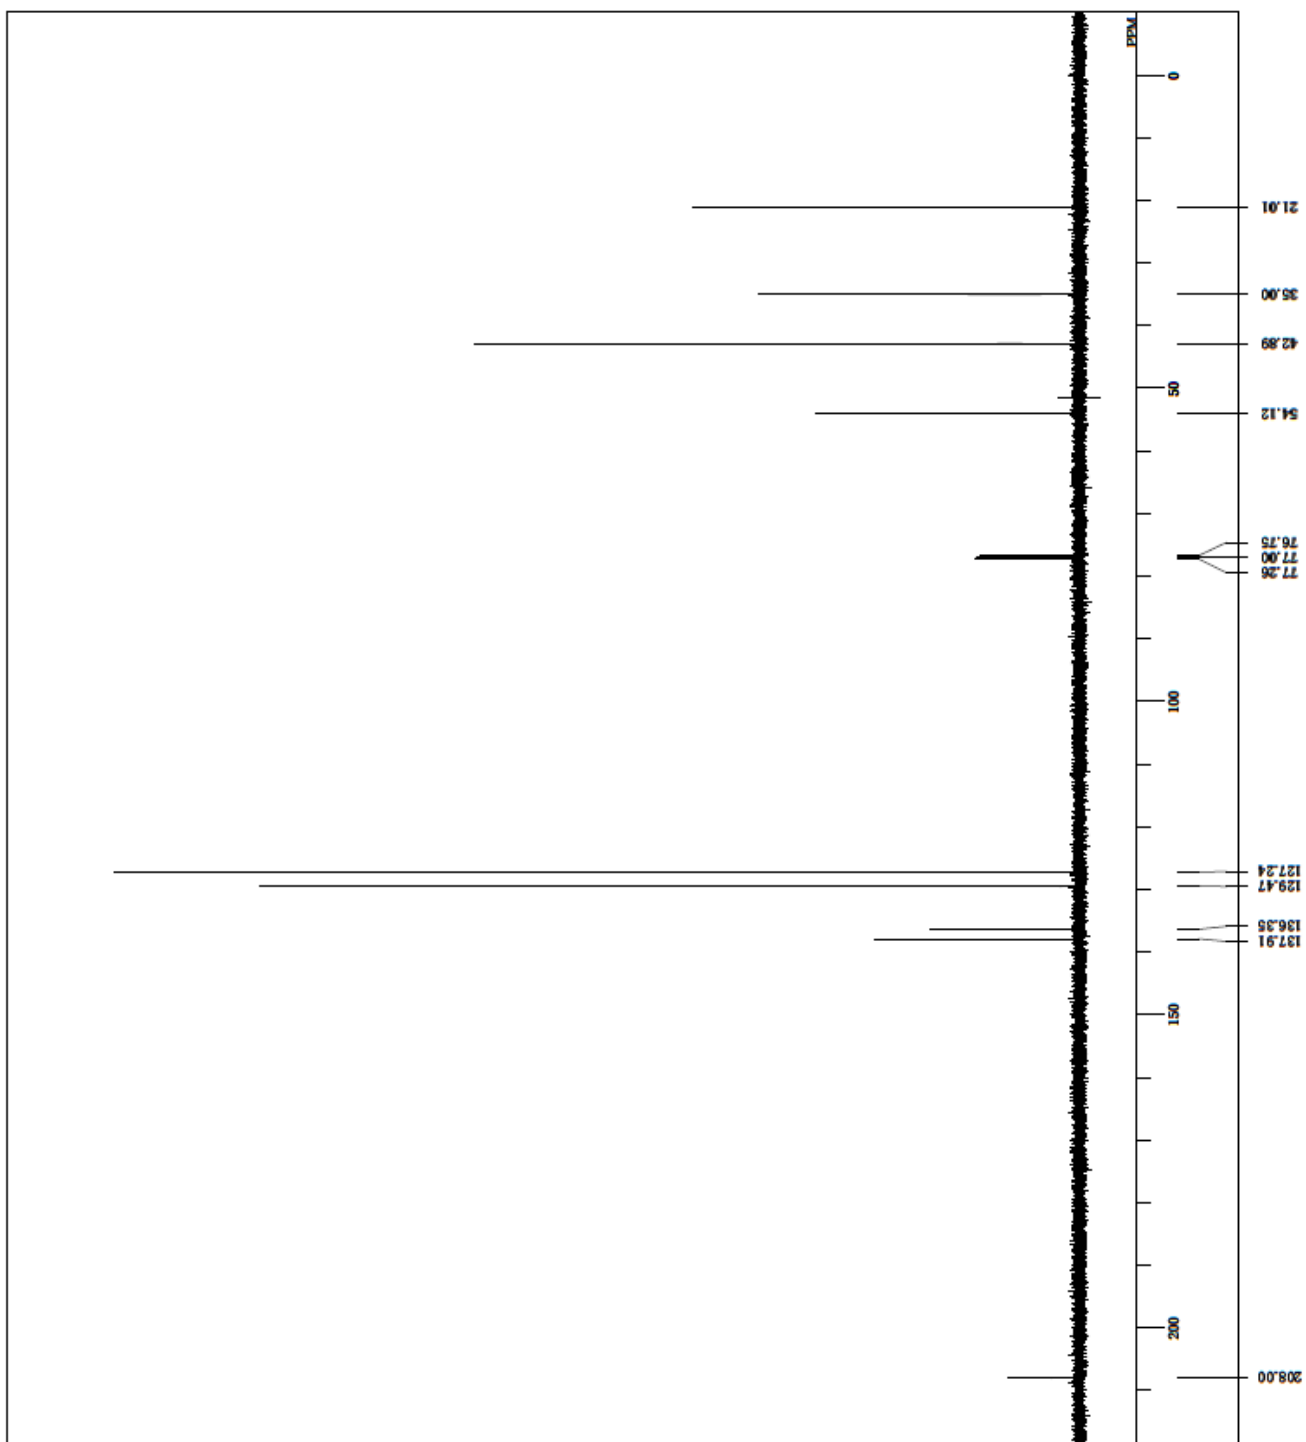

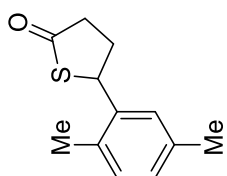

2e

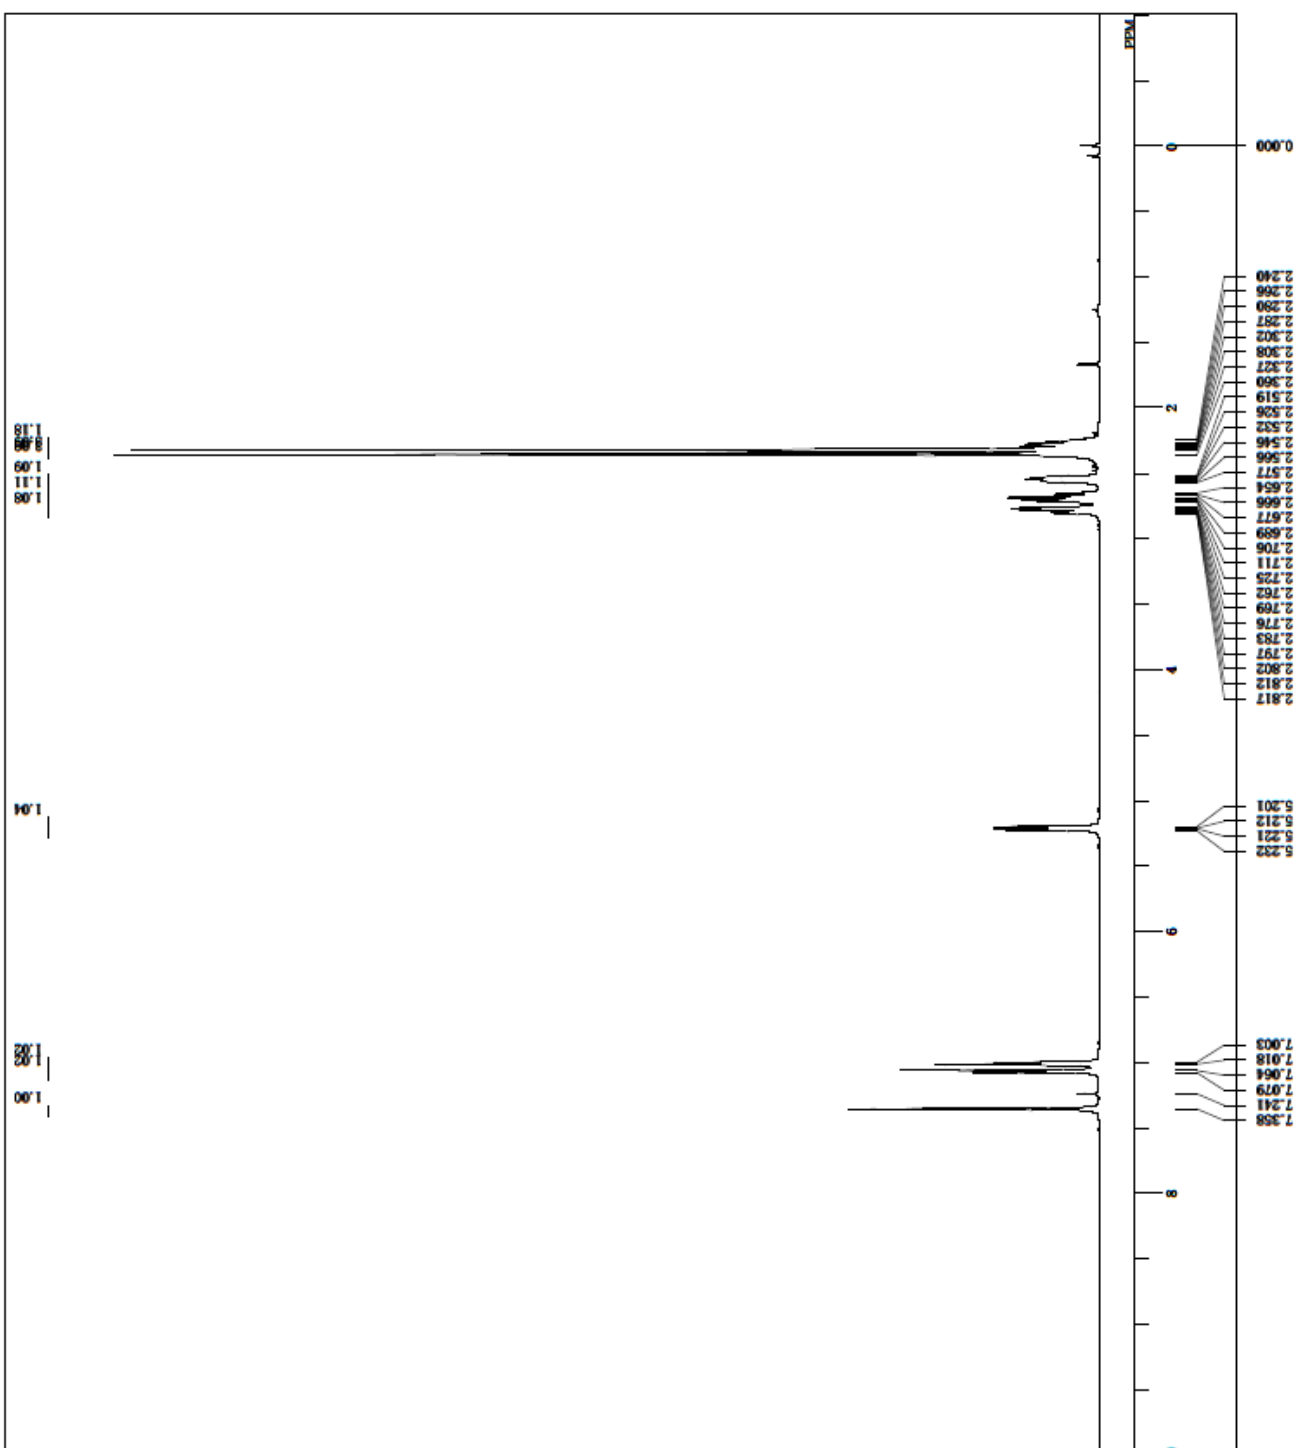

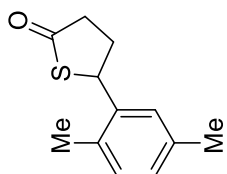

2e

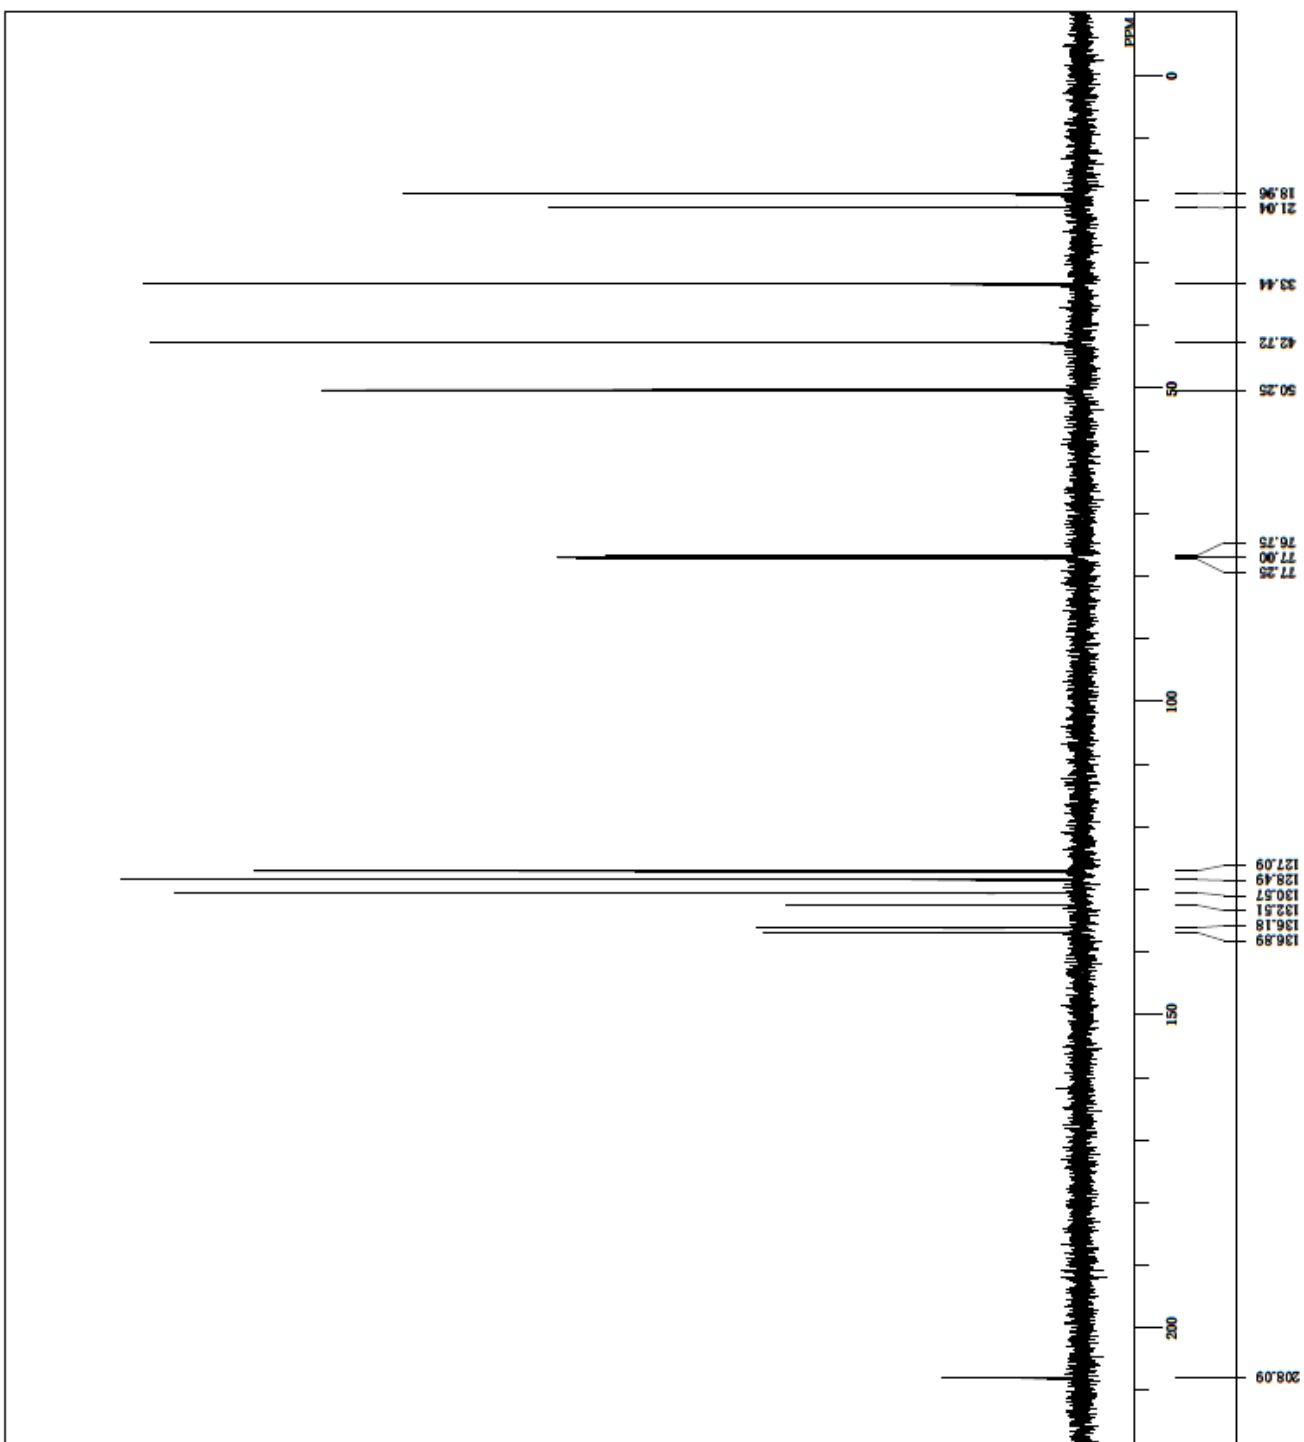

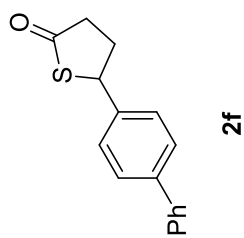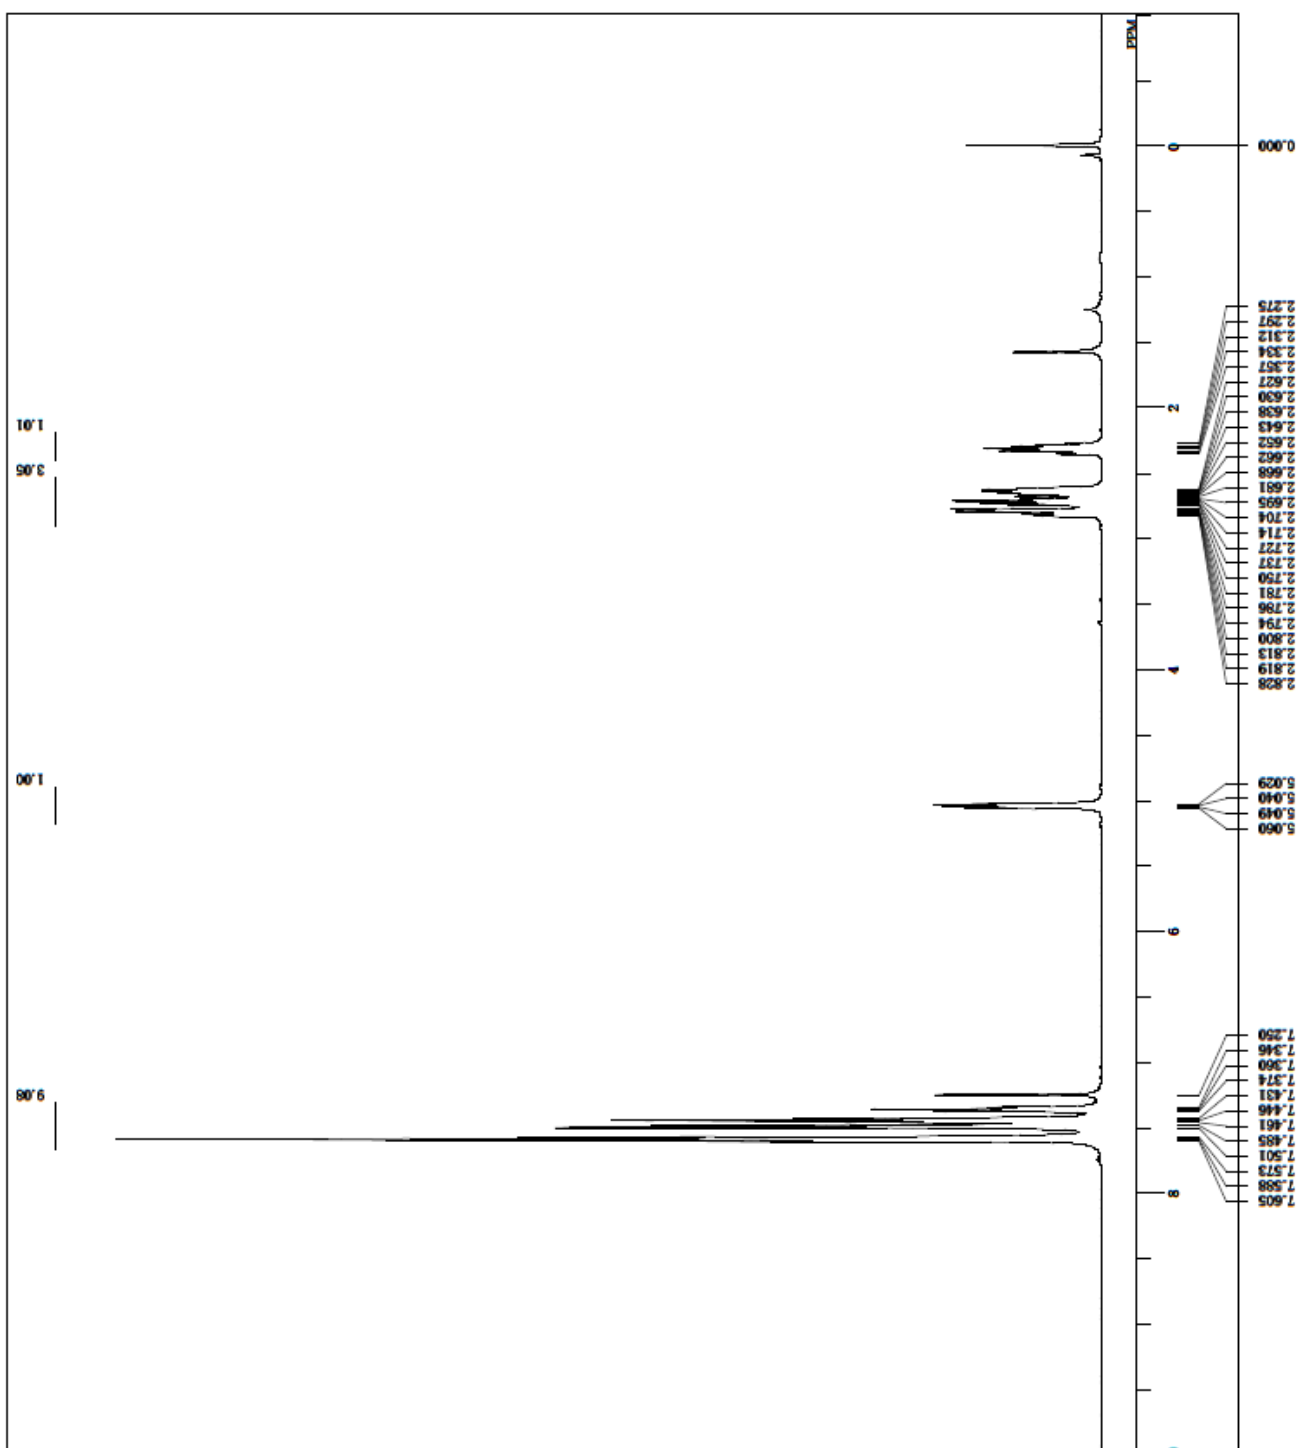

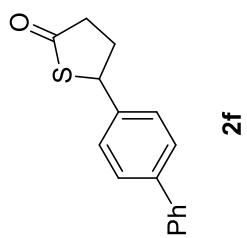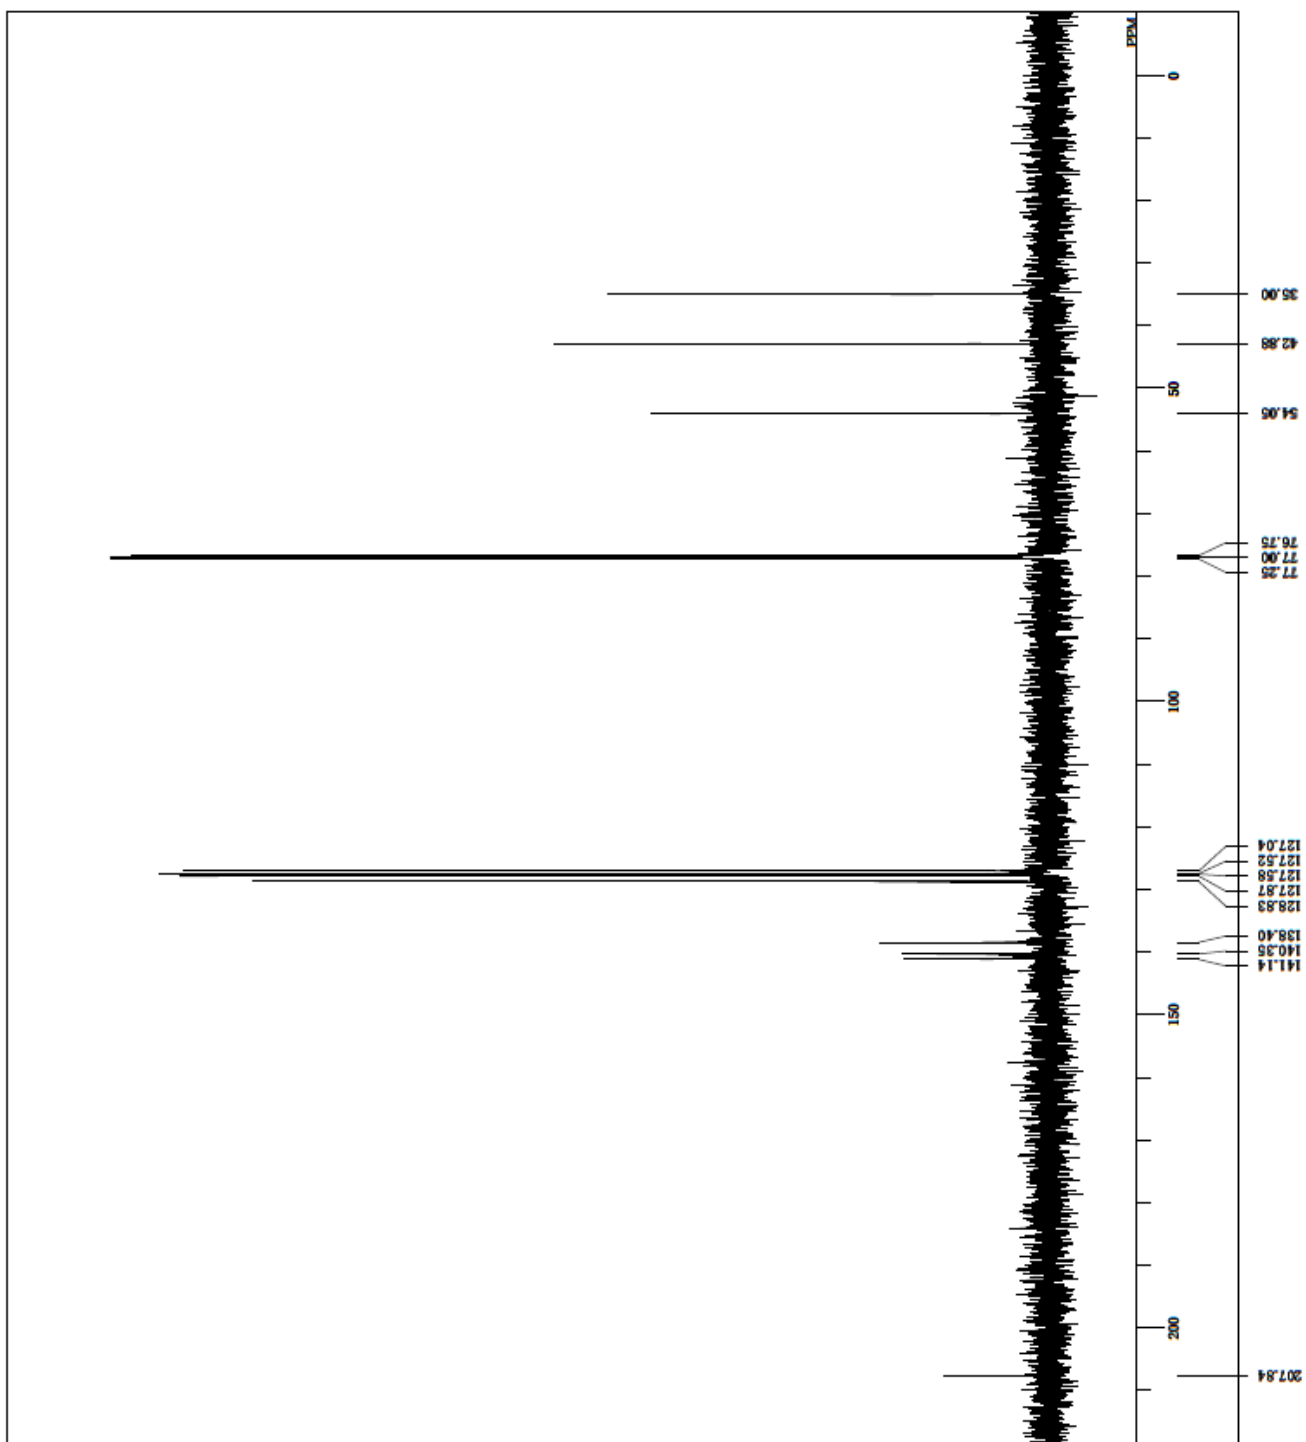

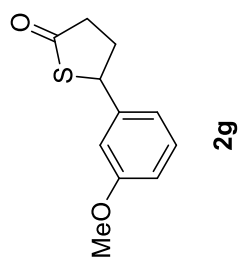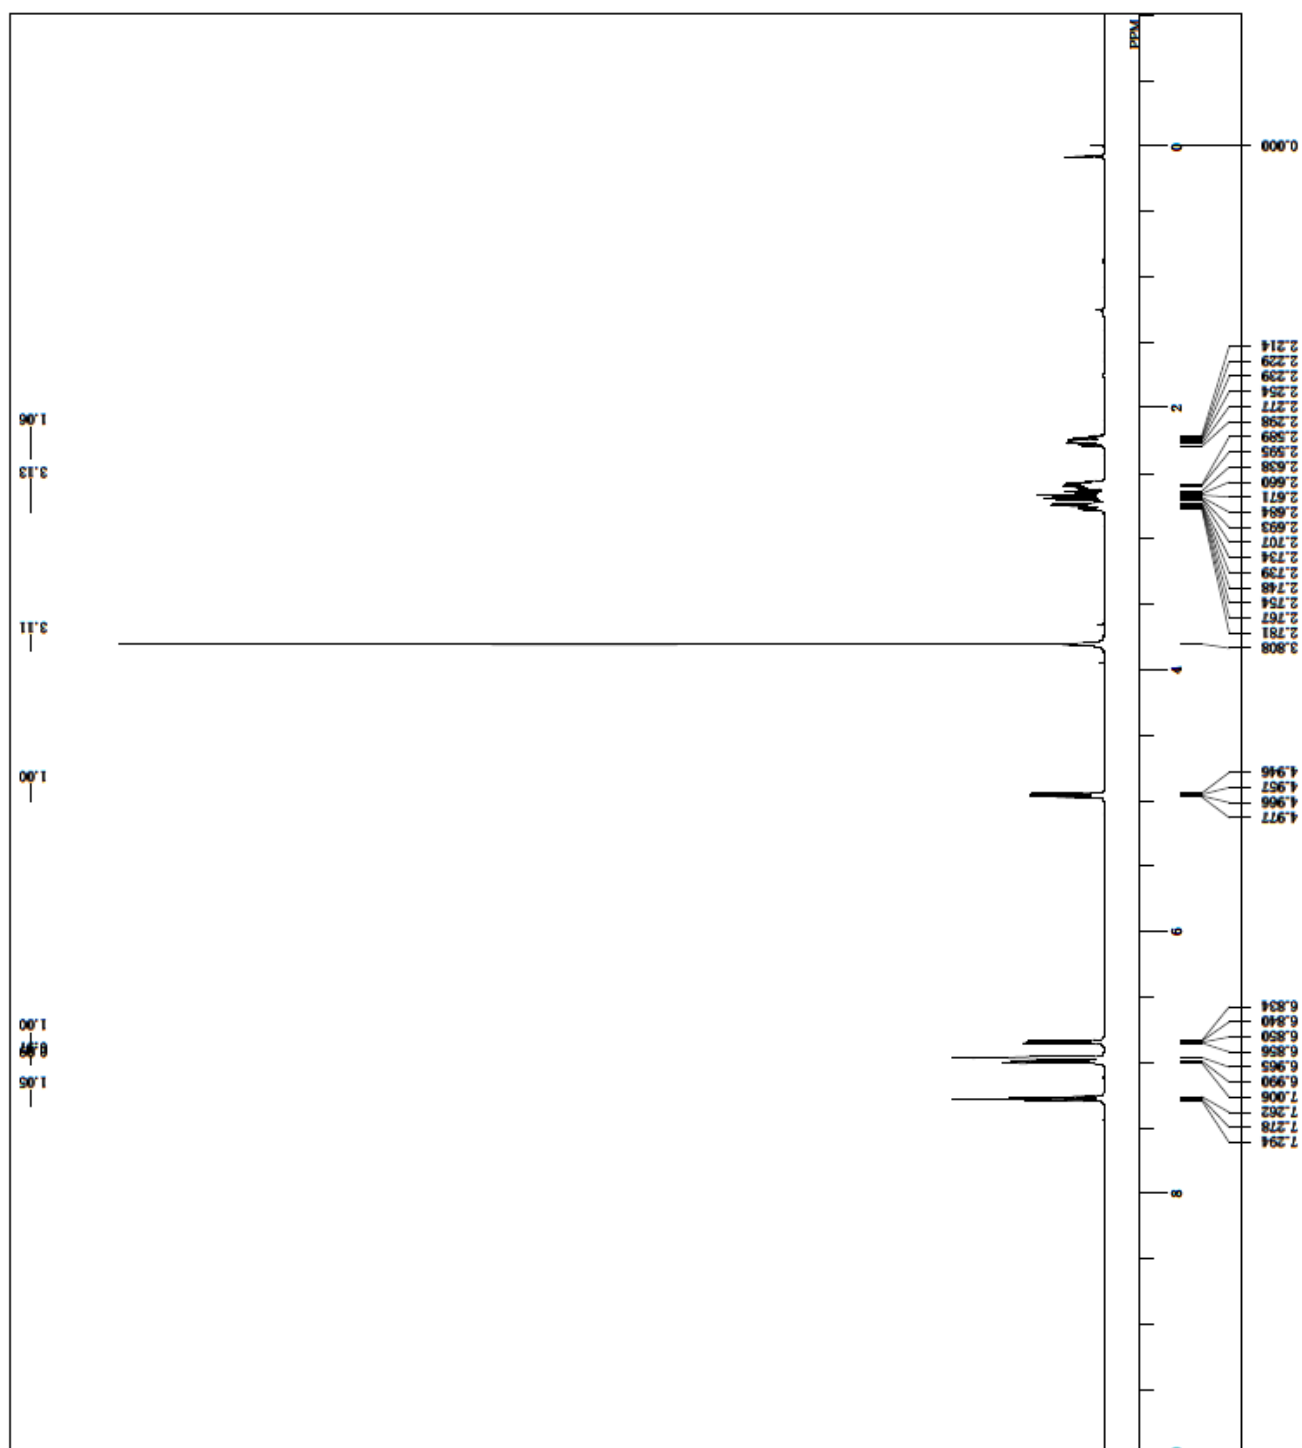

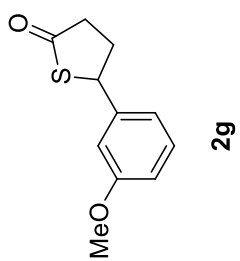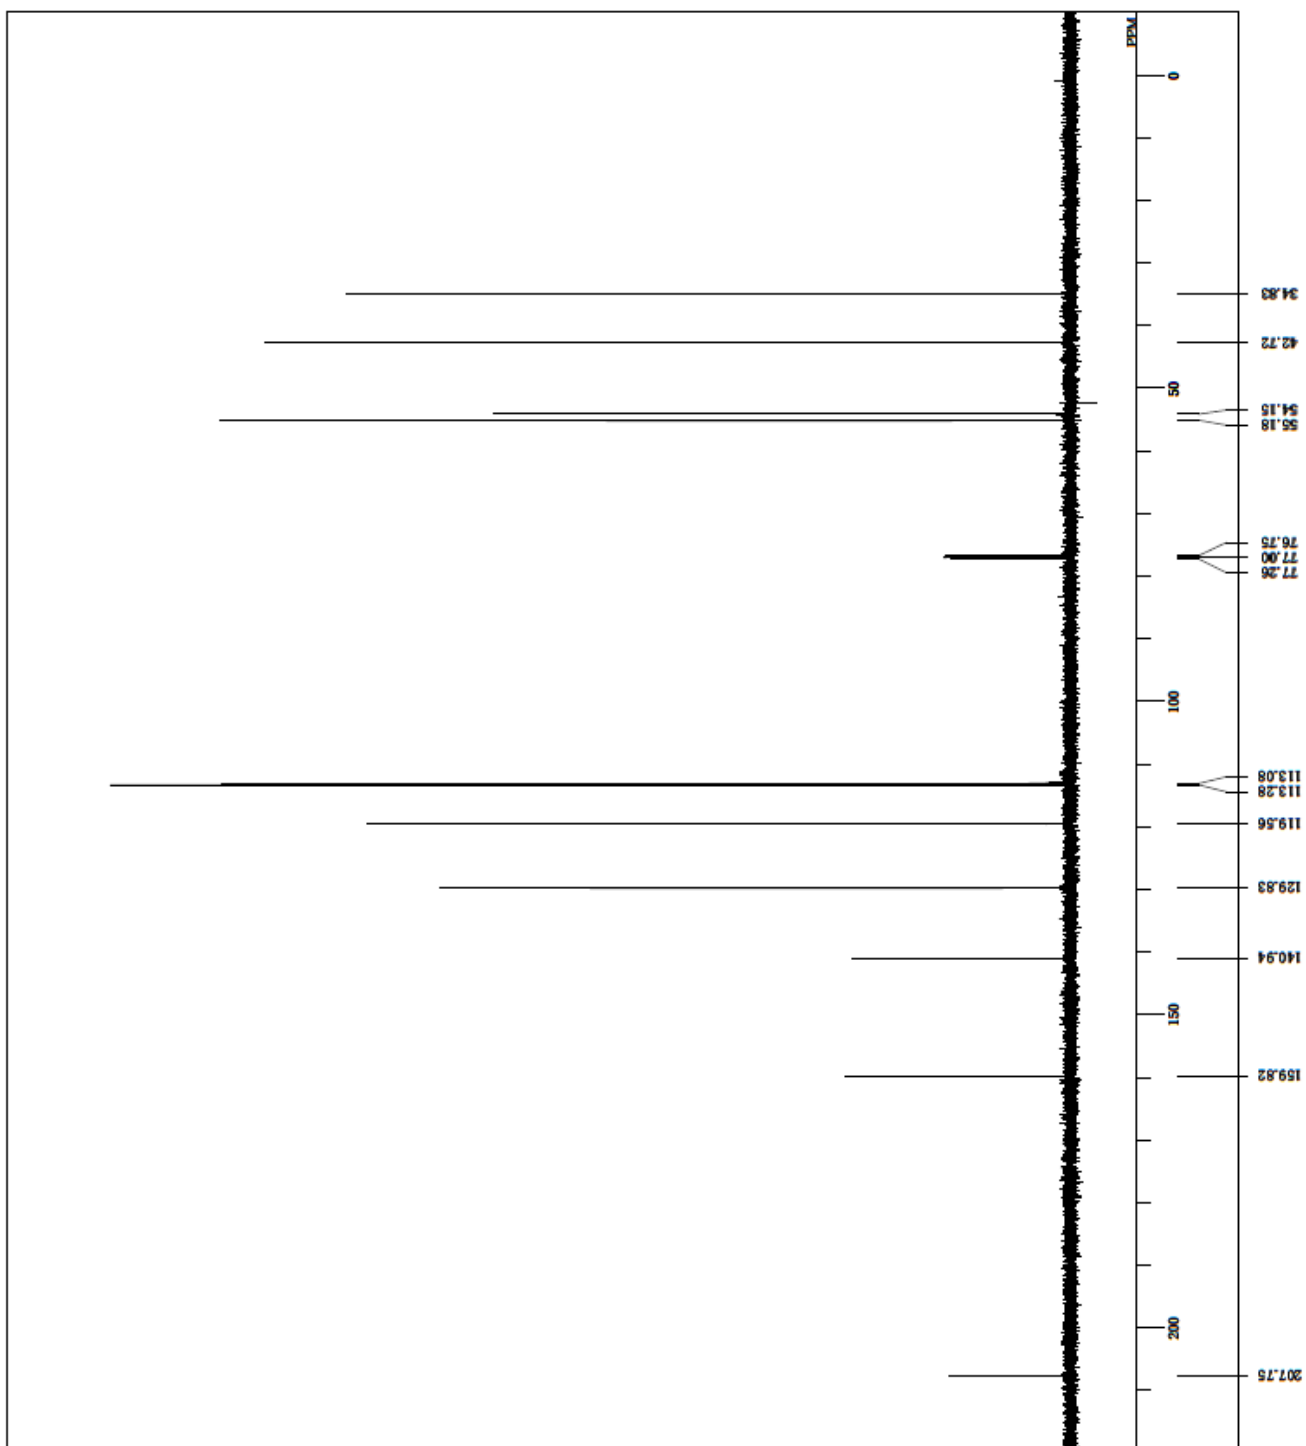

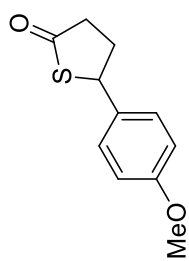

2h

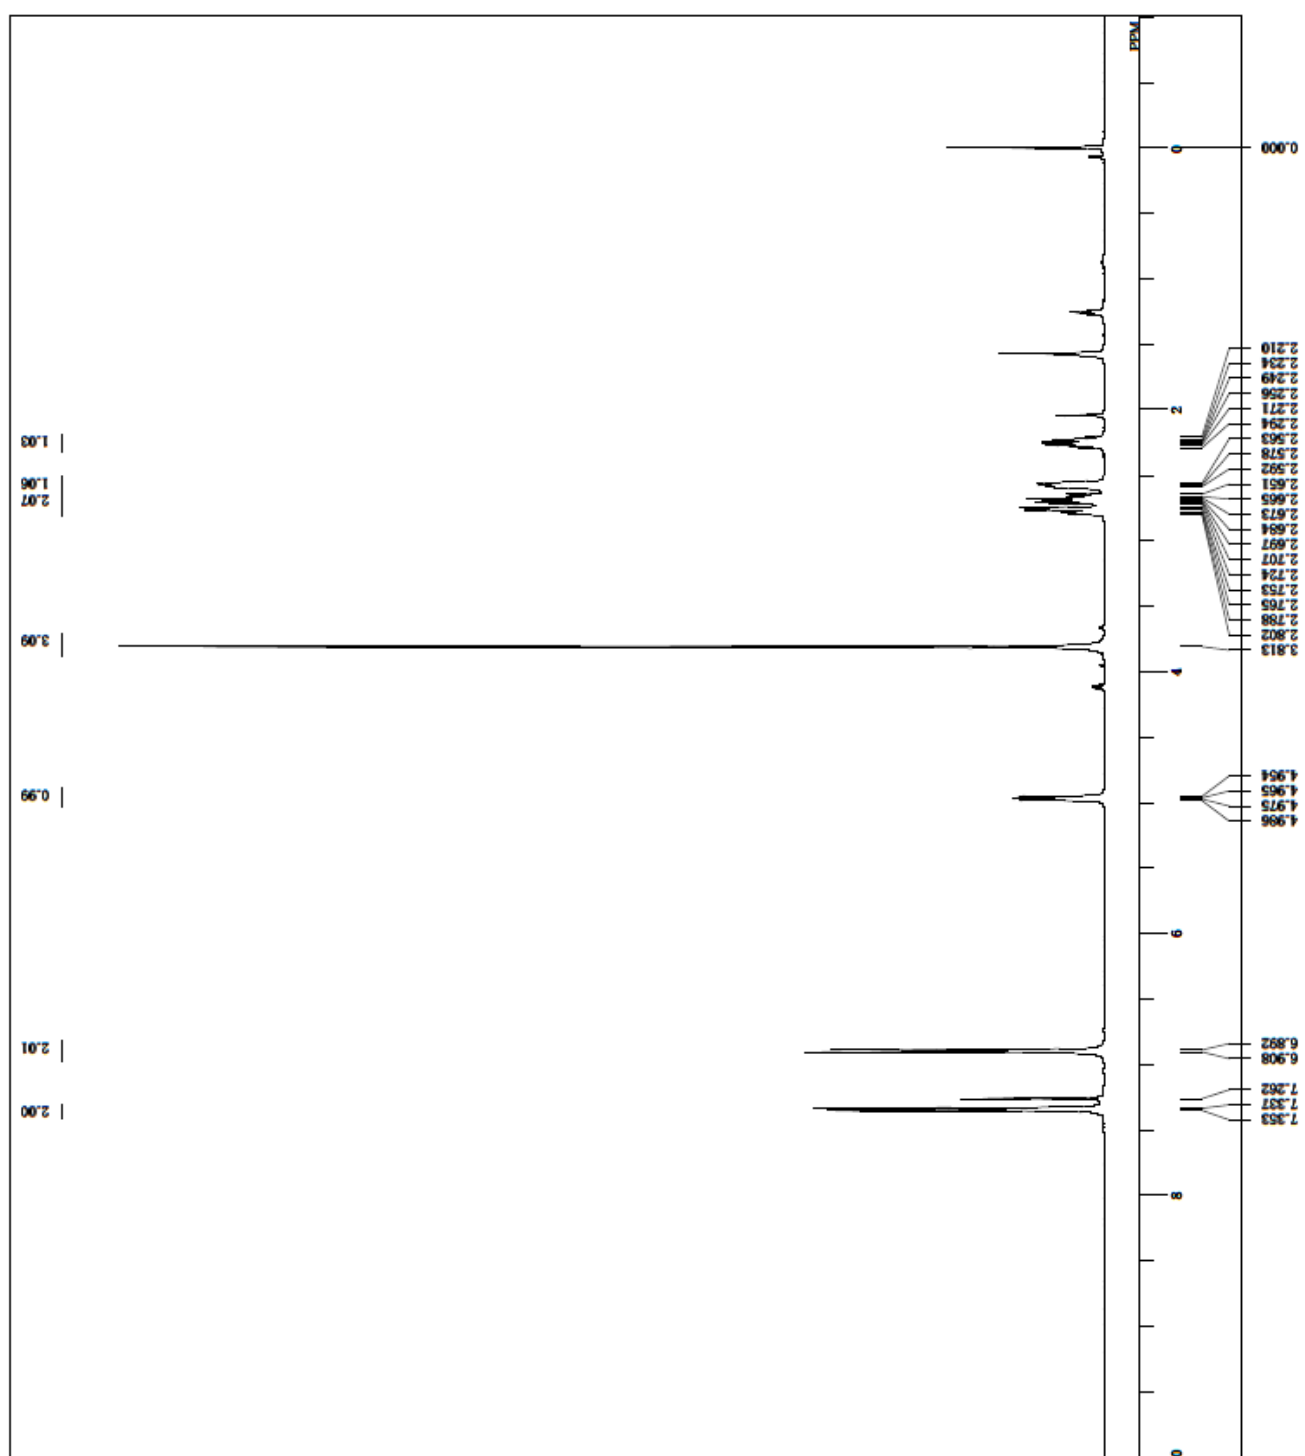



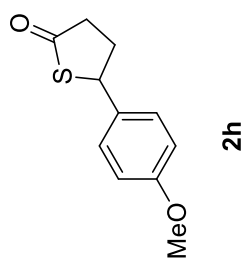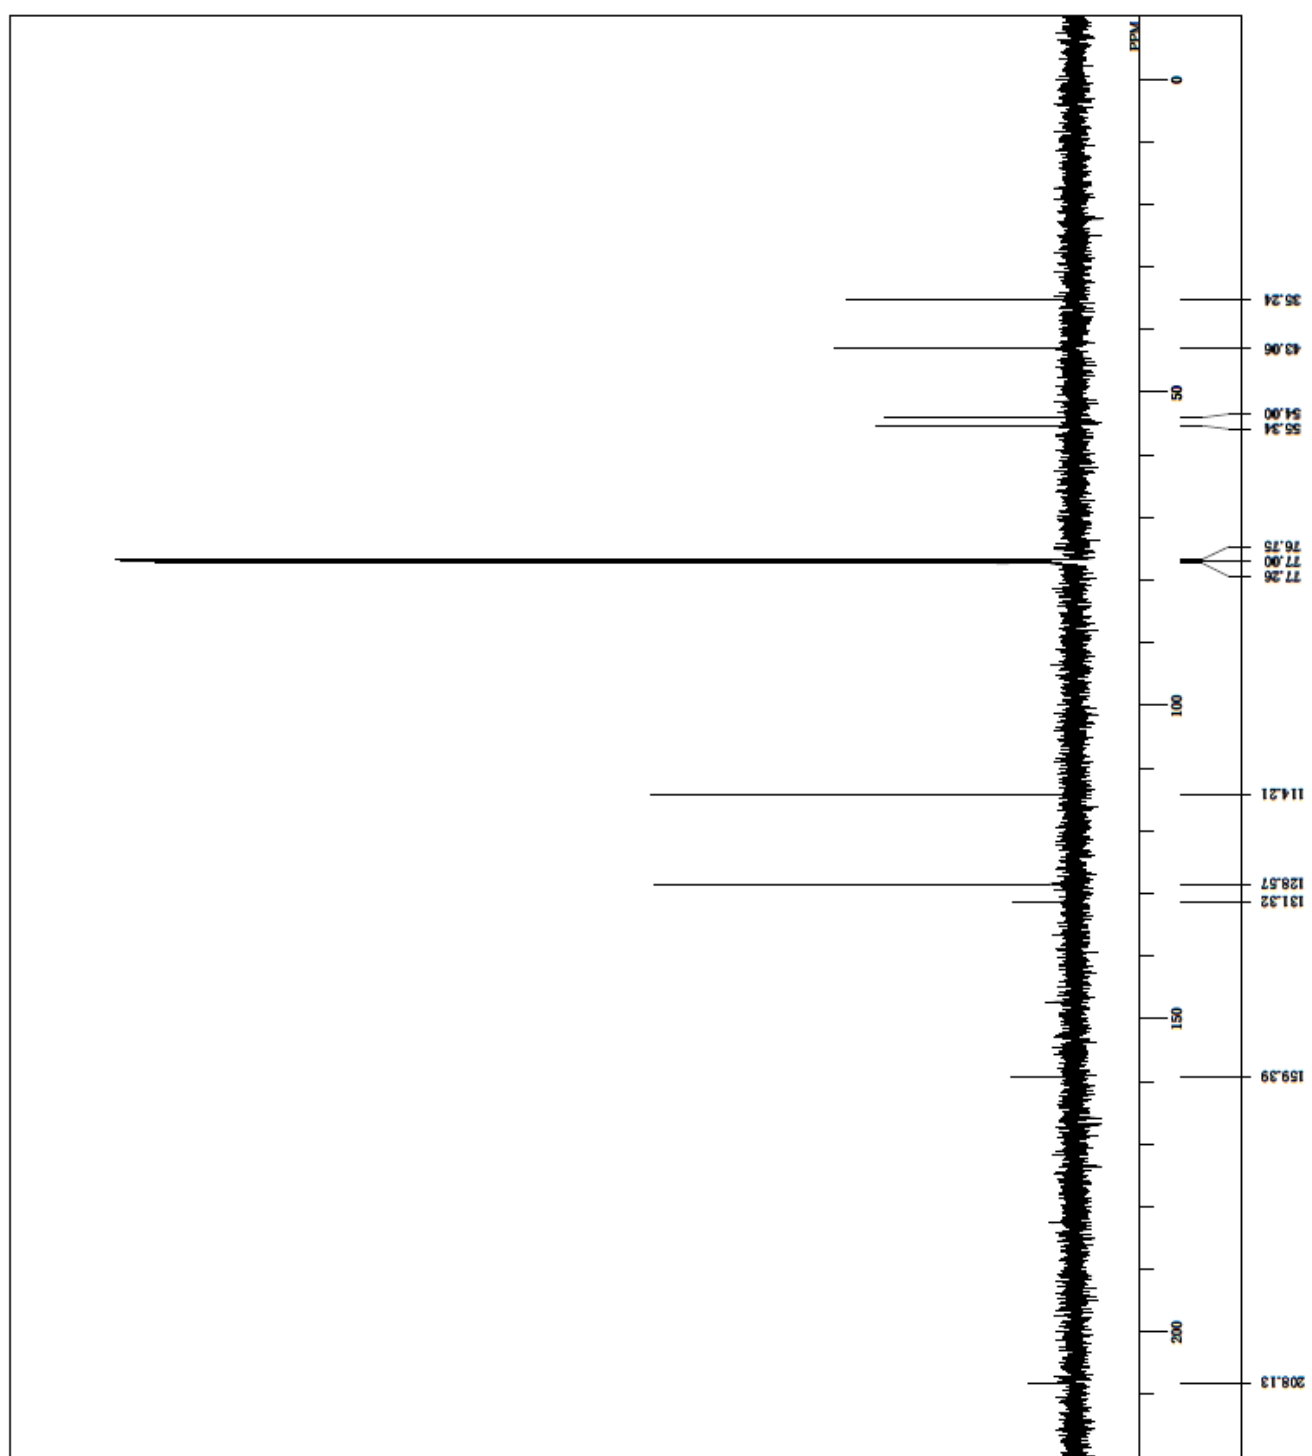

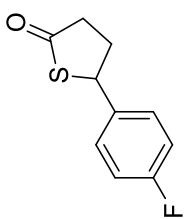

2i

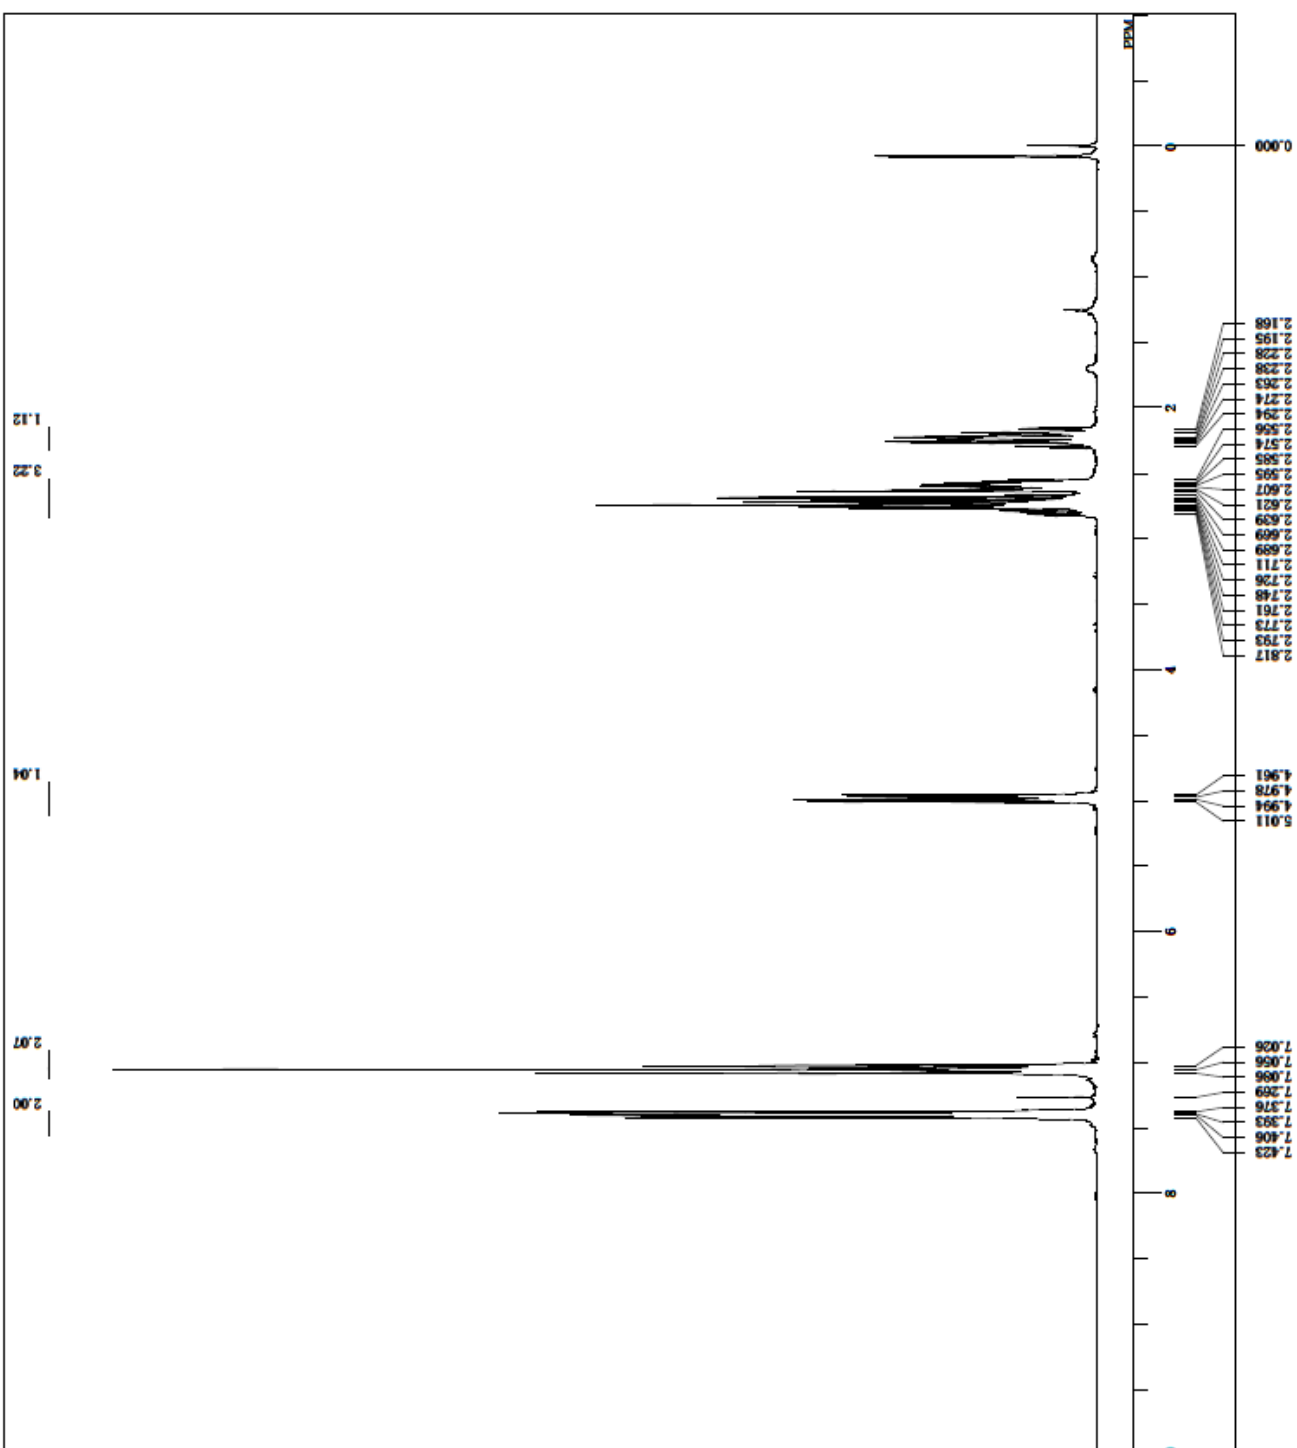

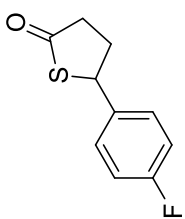

2i

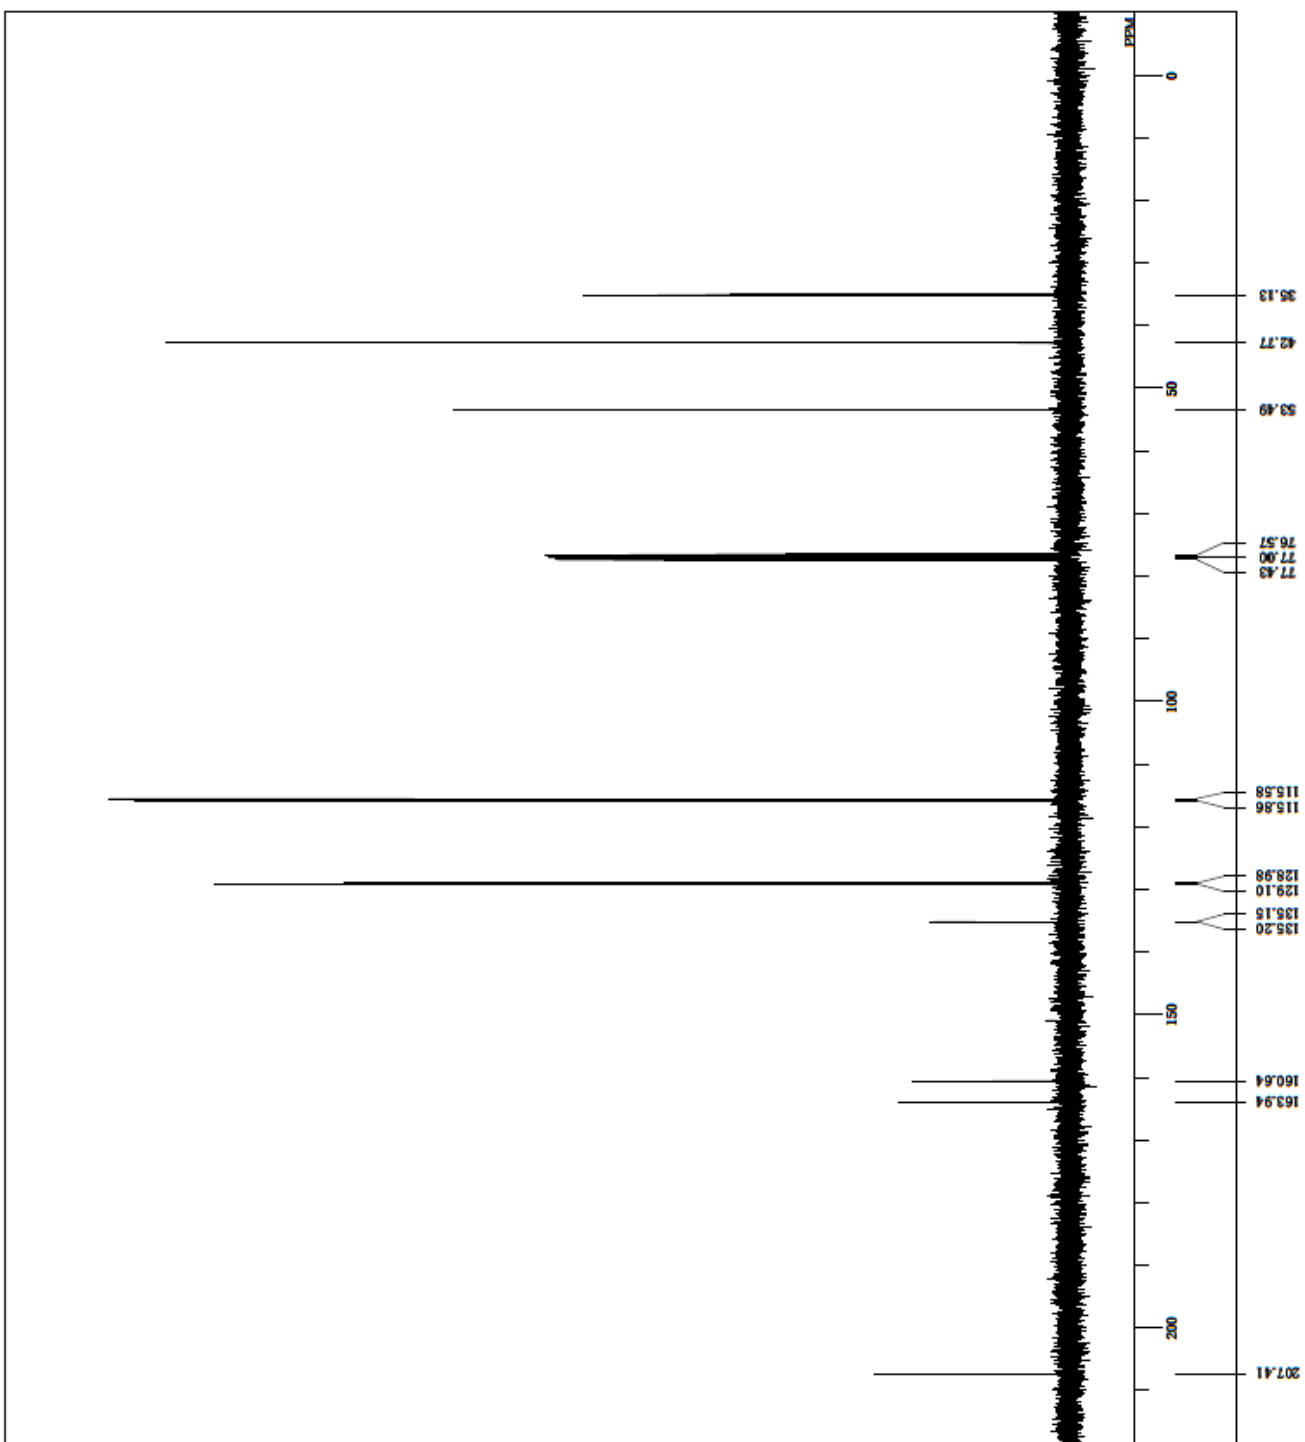

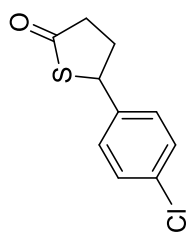

2j

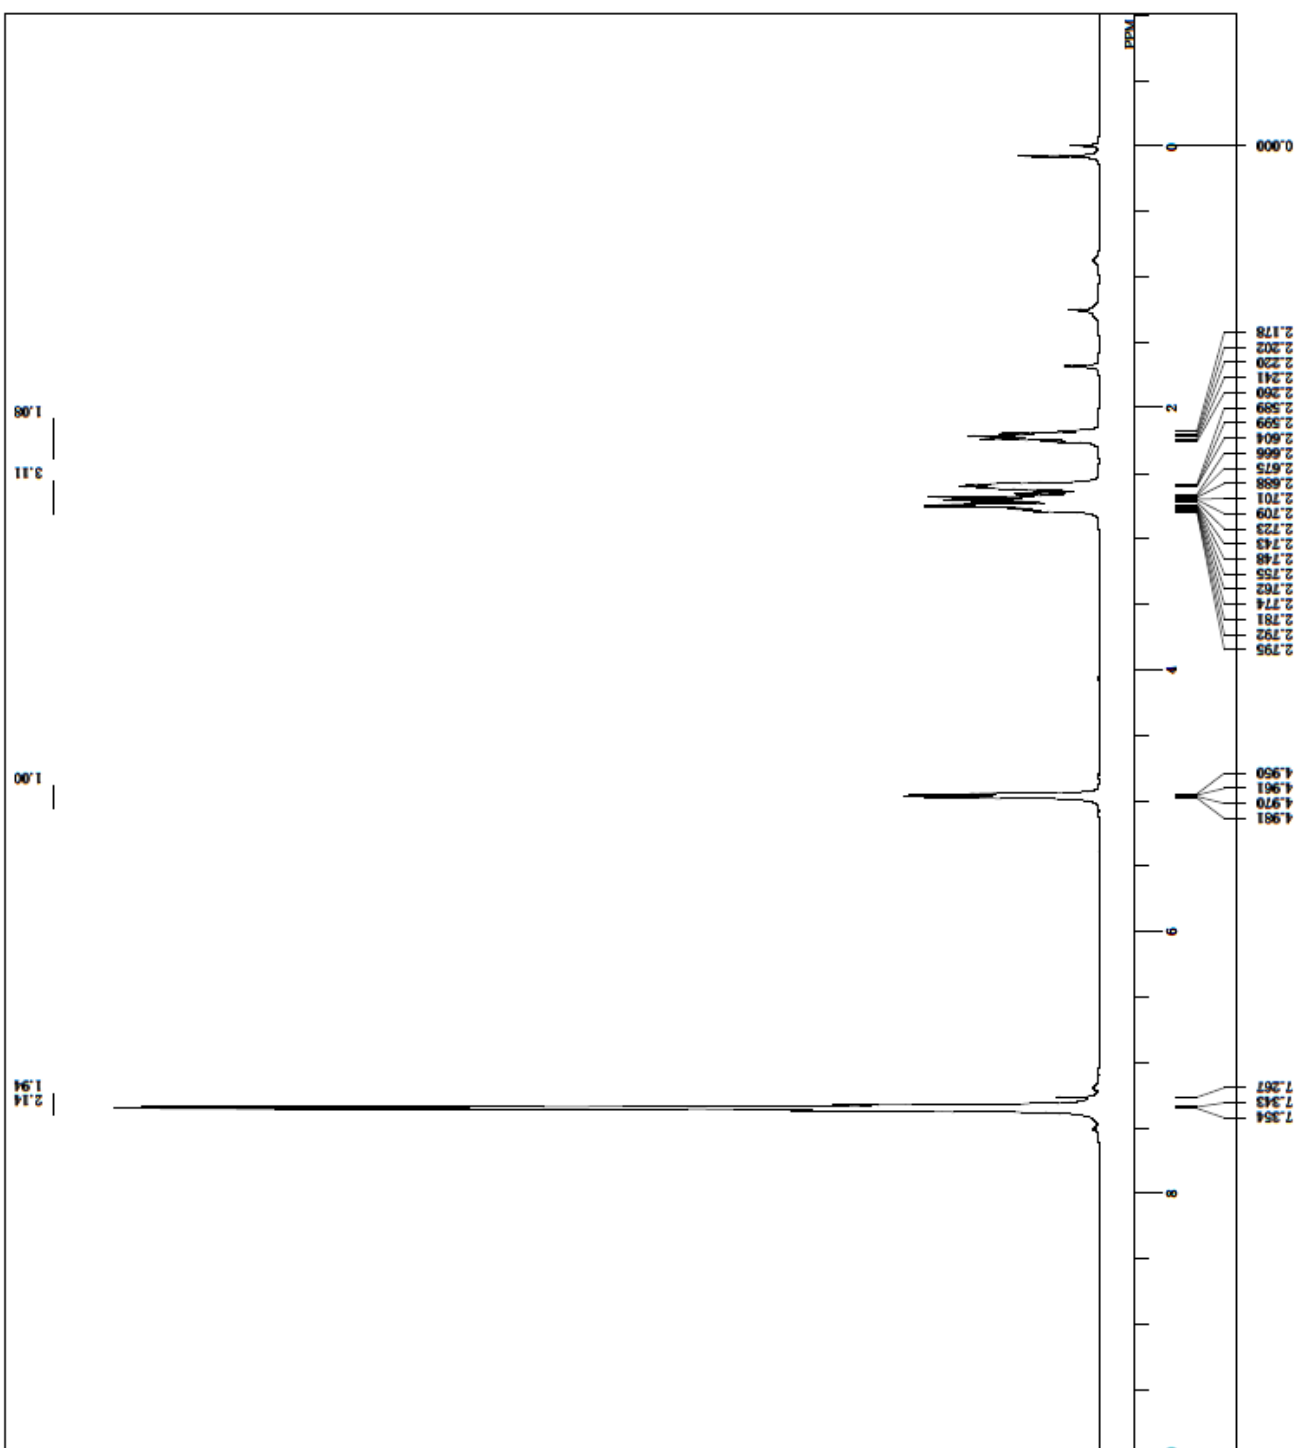

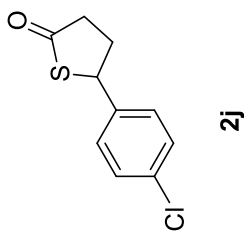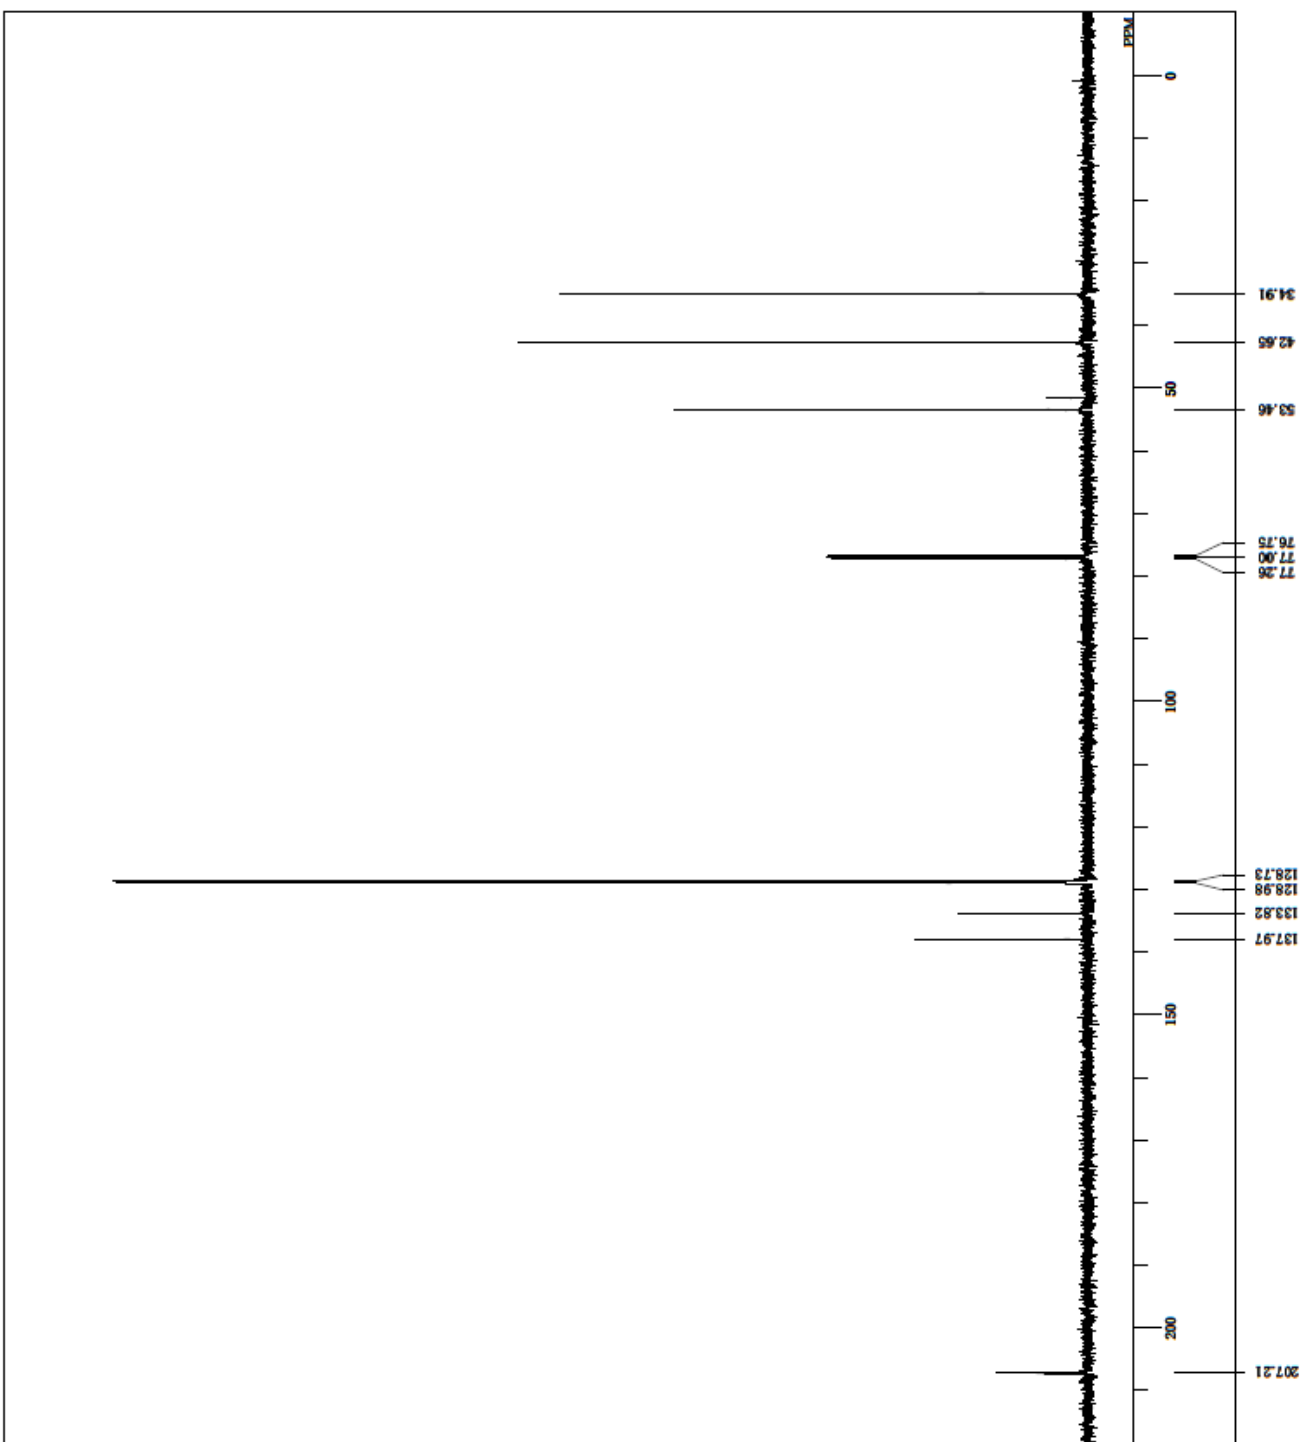

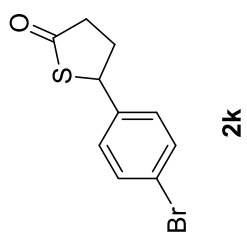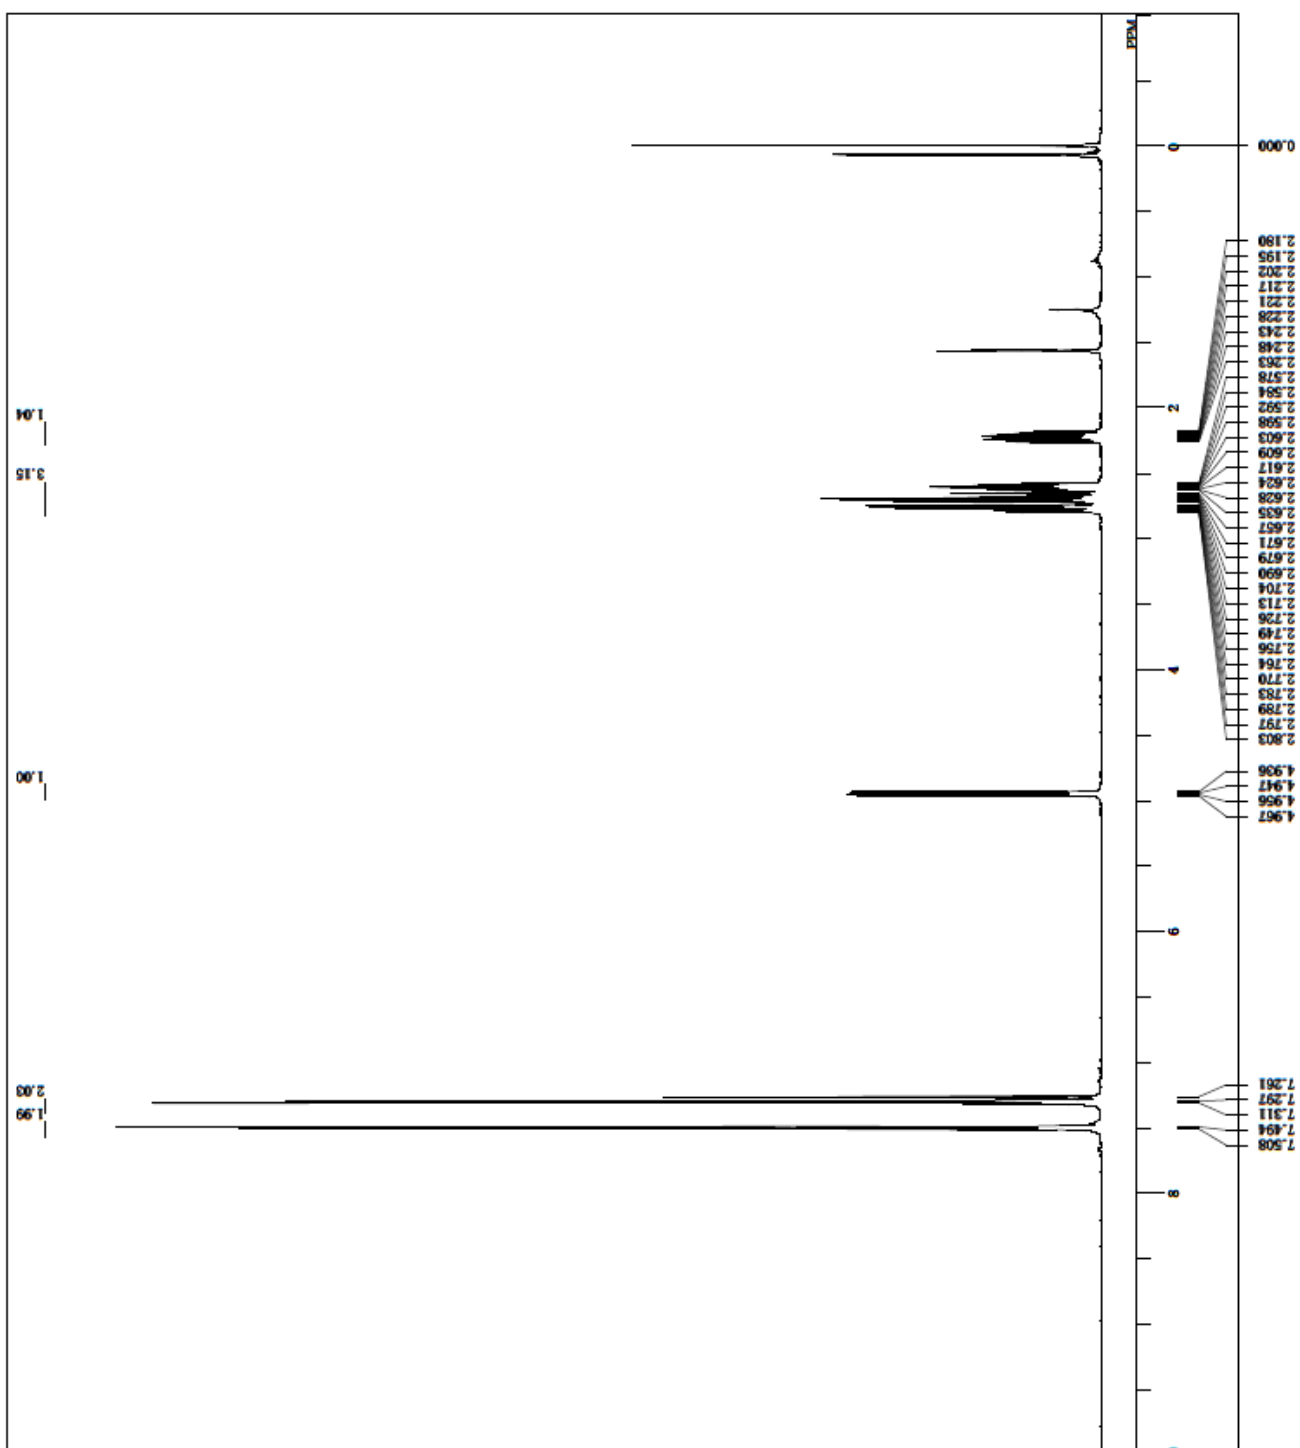

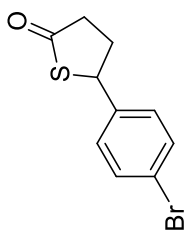

2k

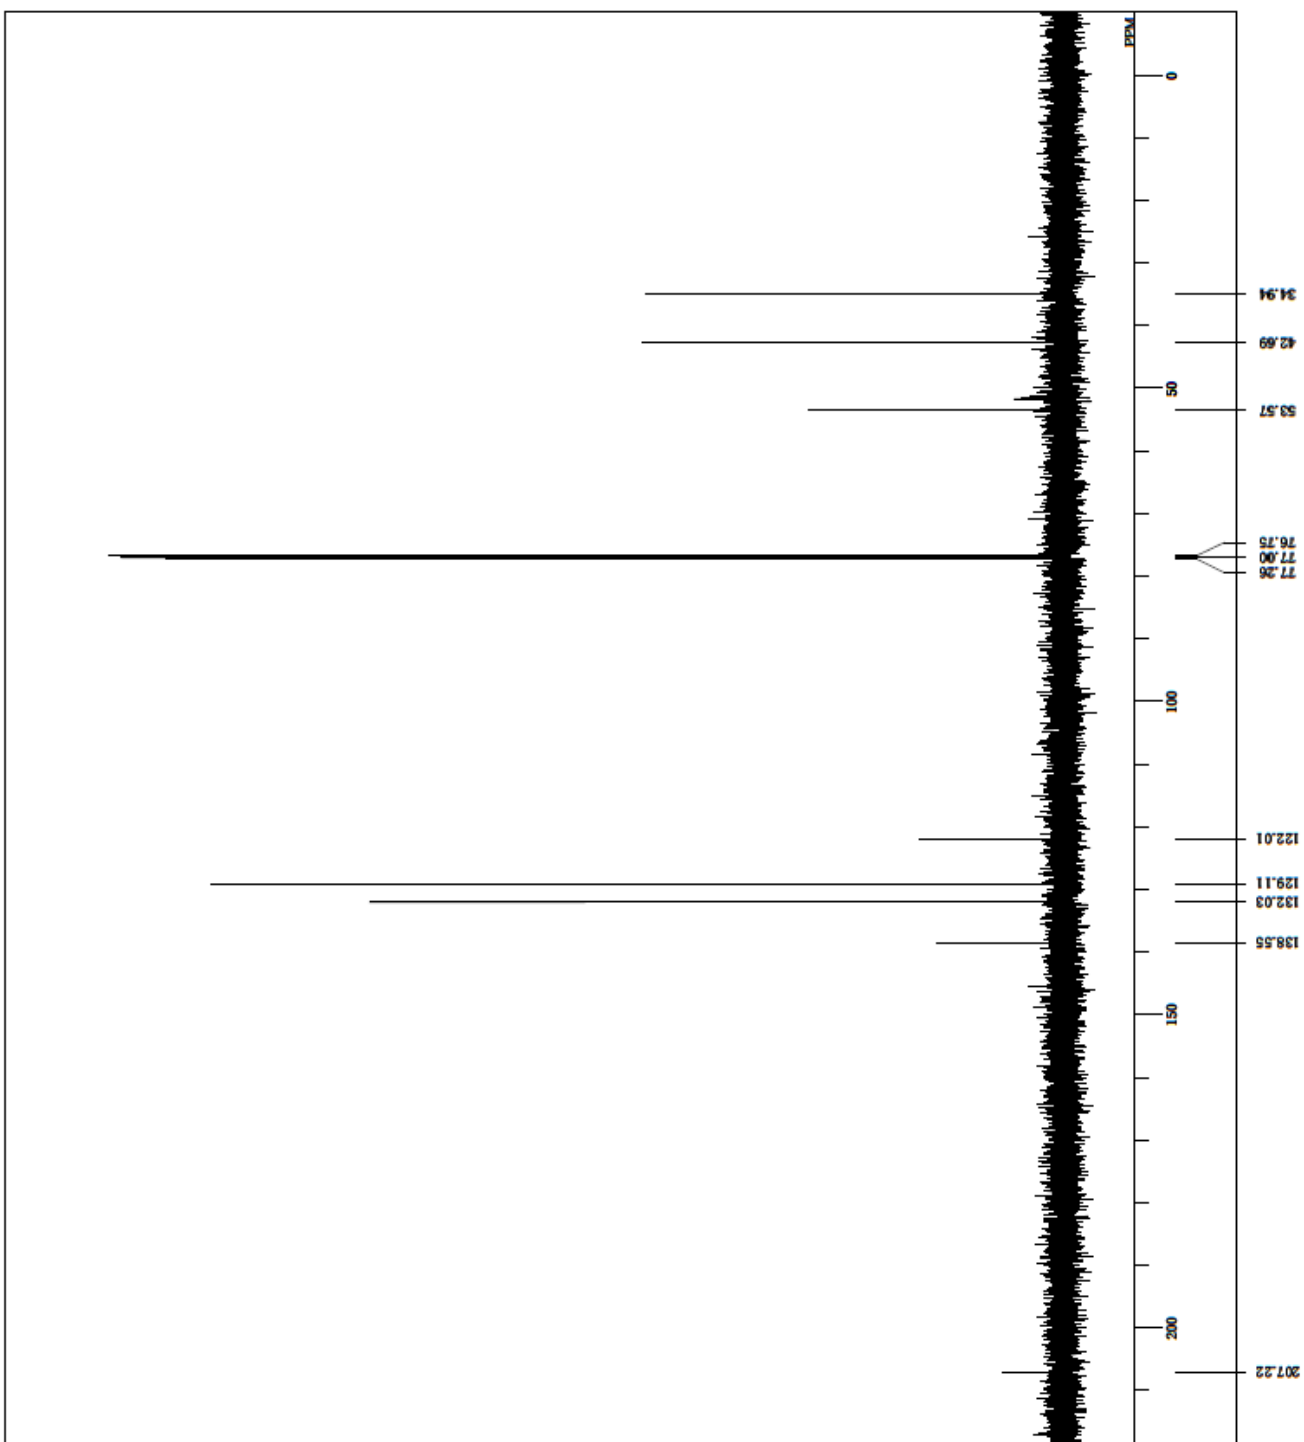

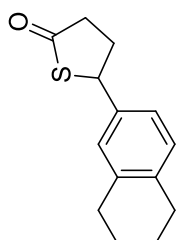

2l

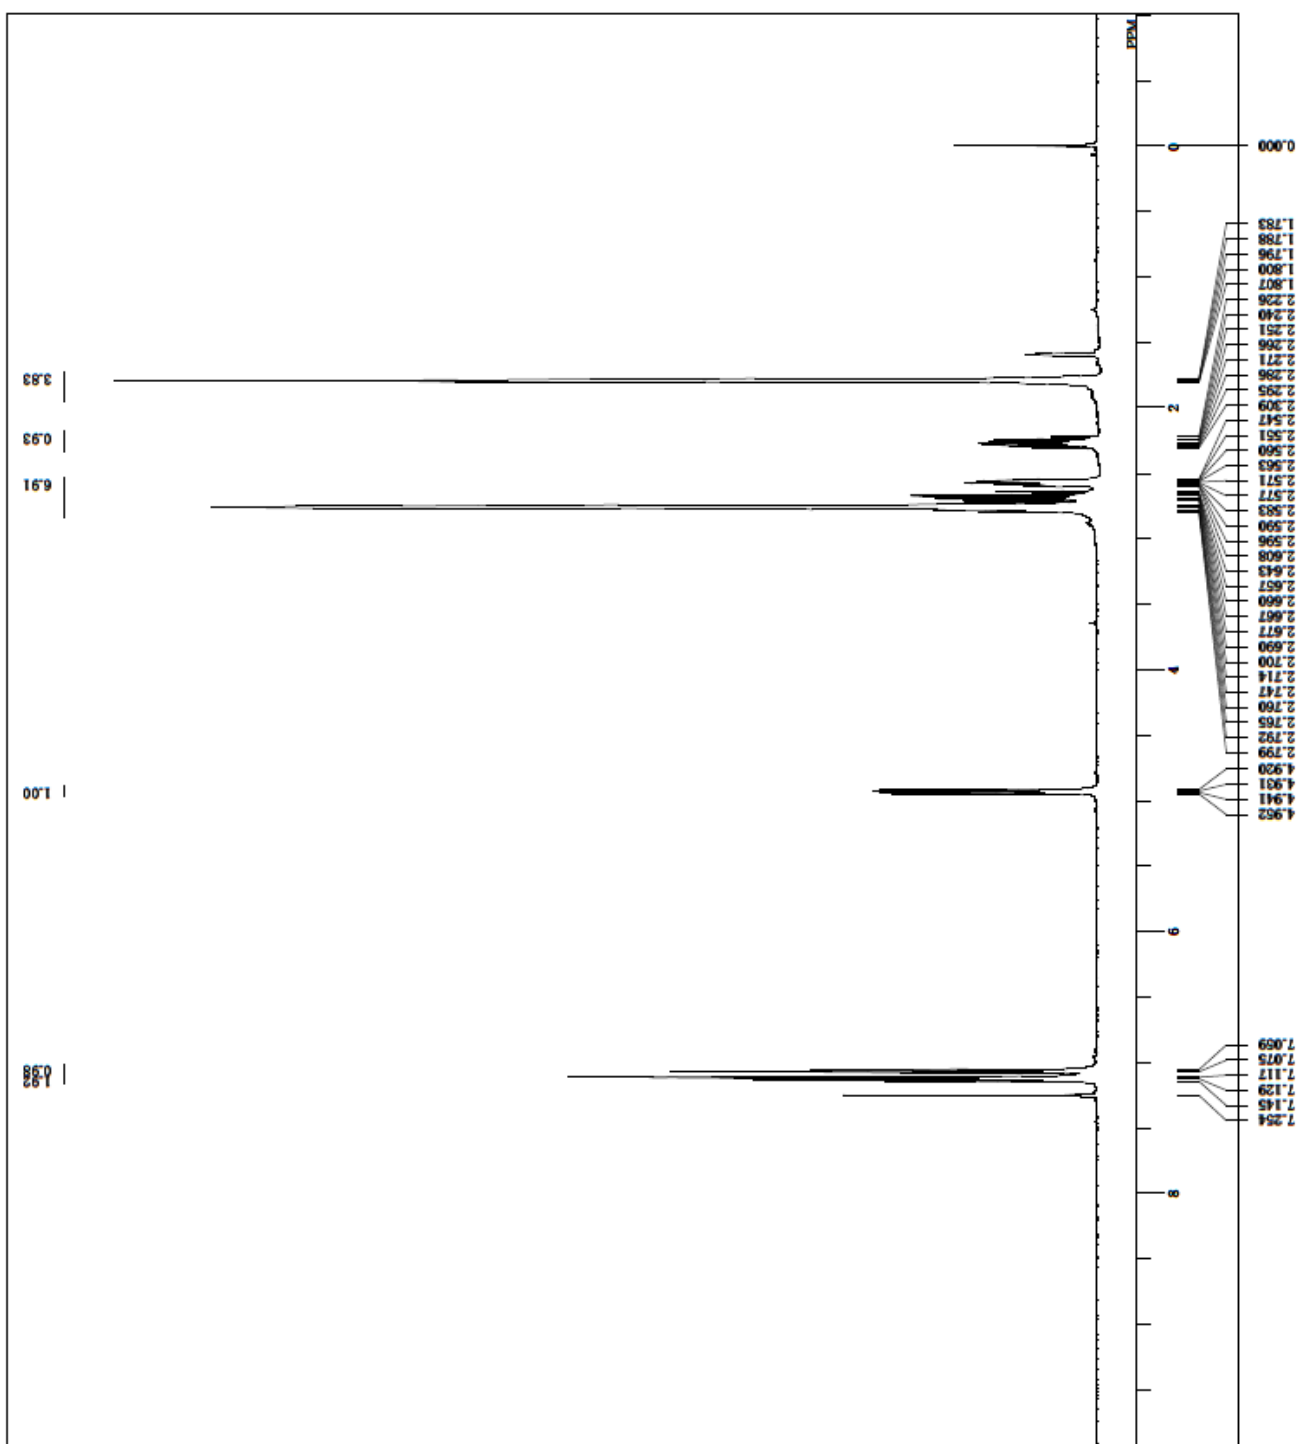



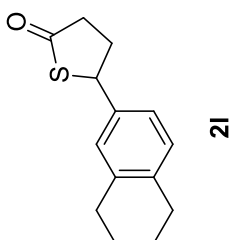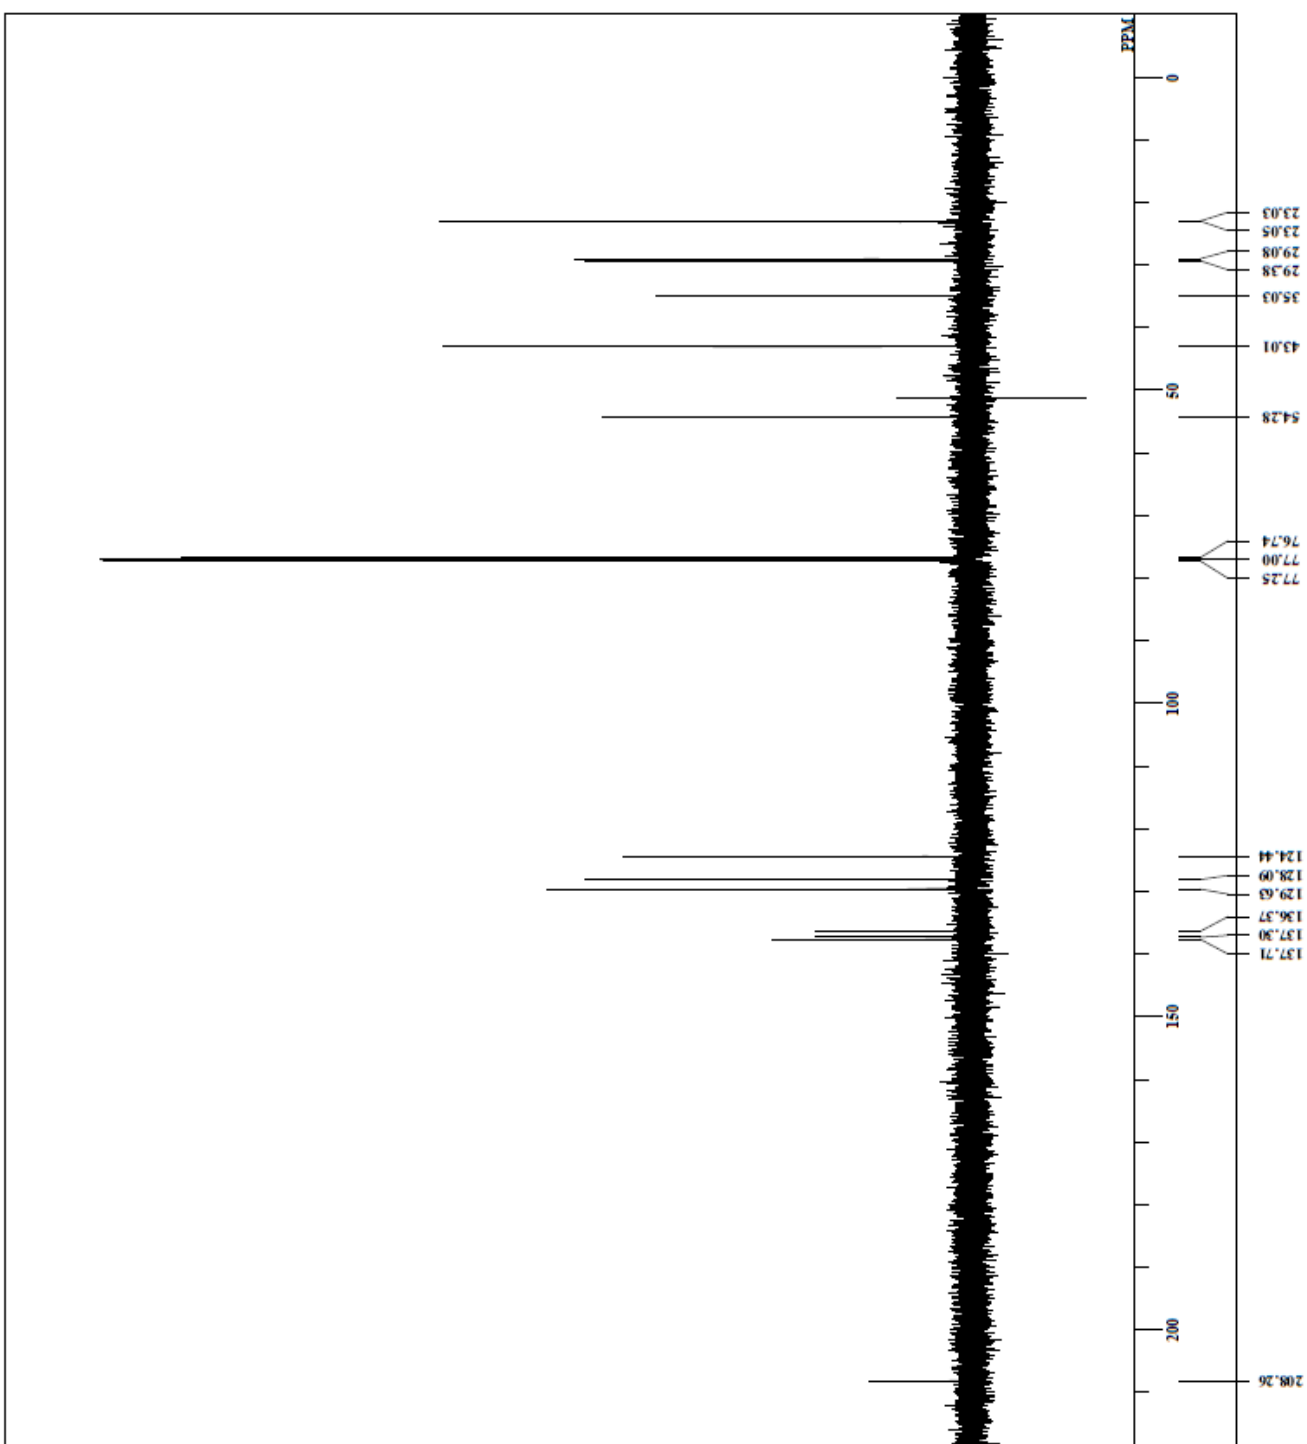

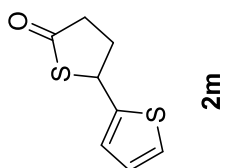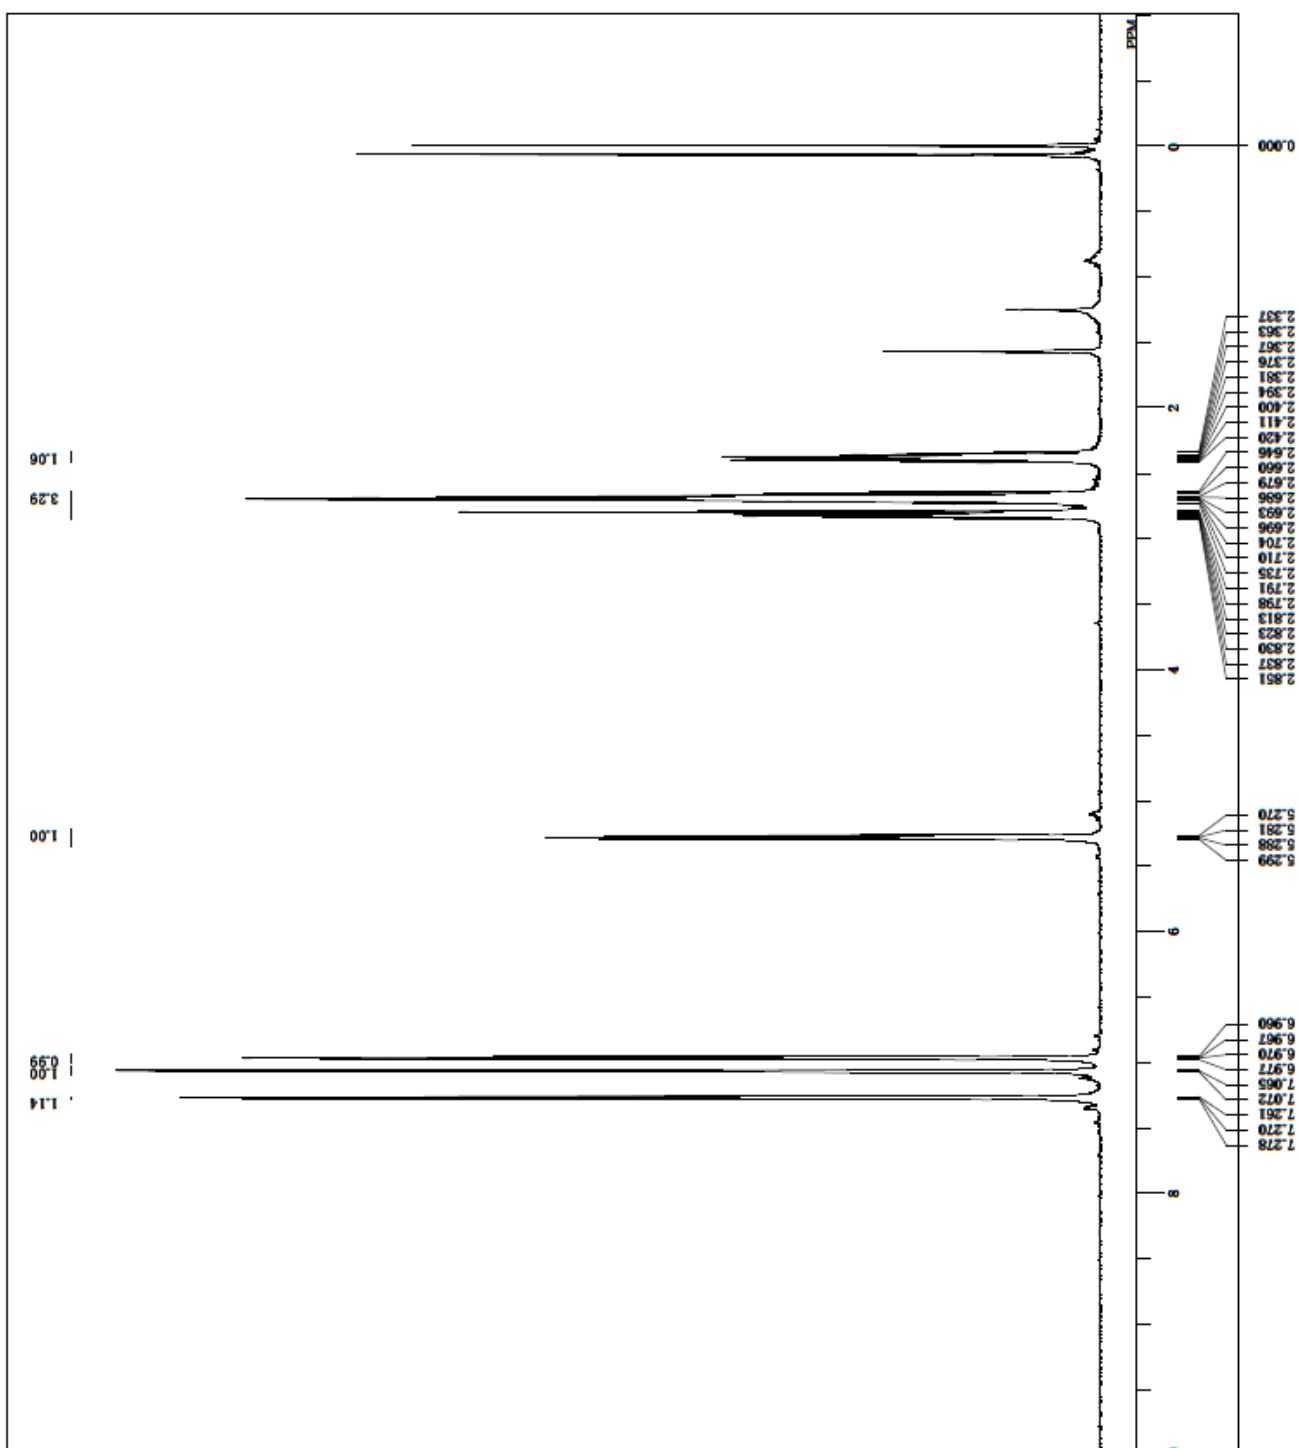

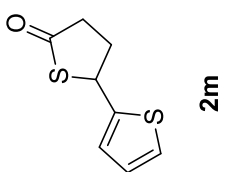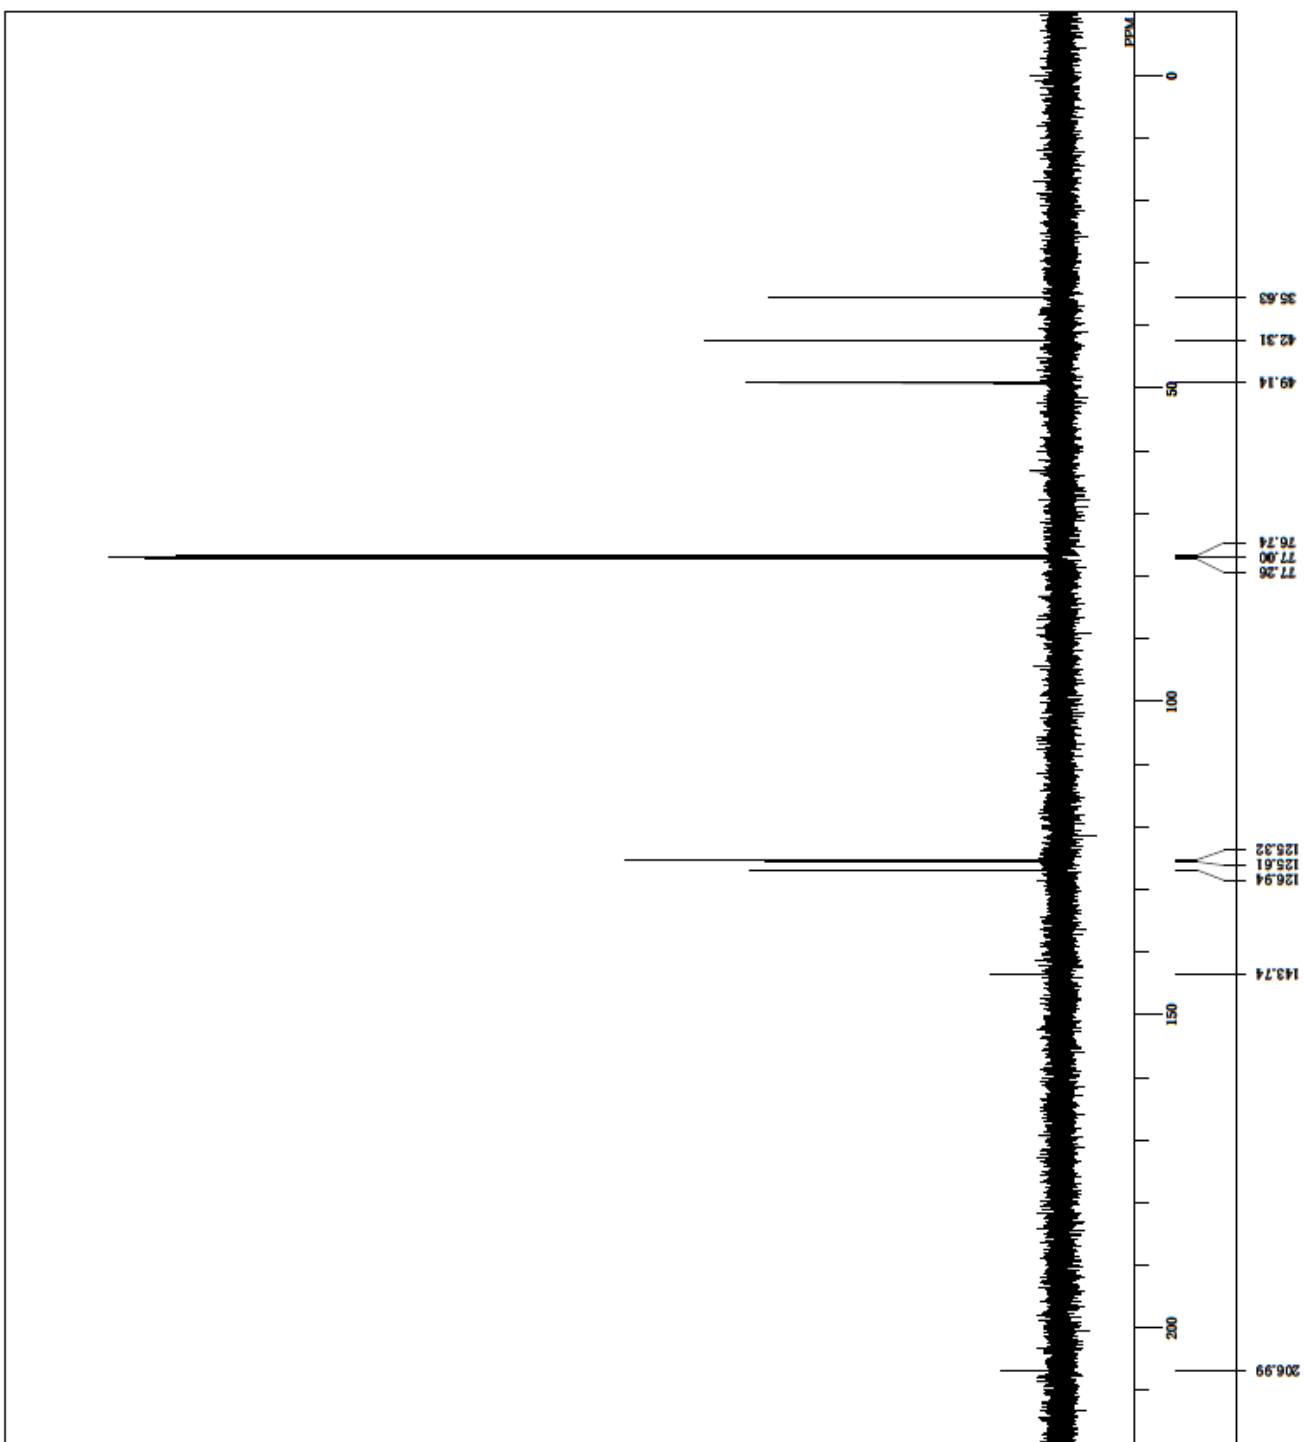

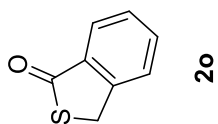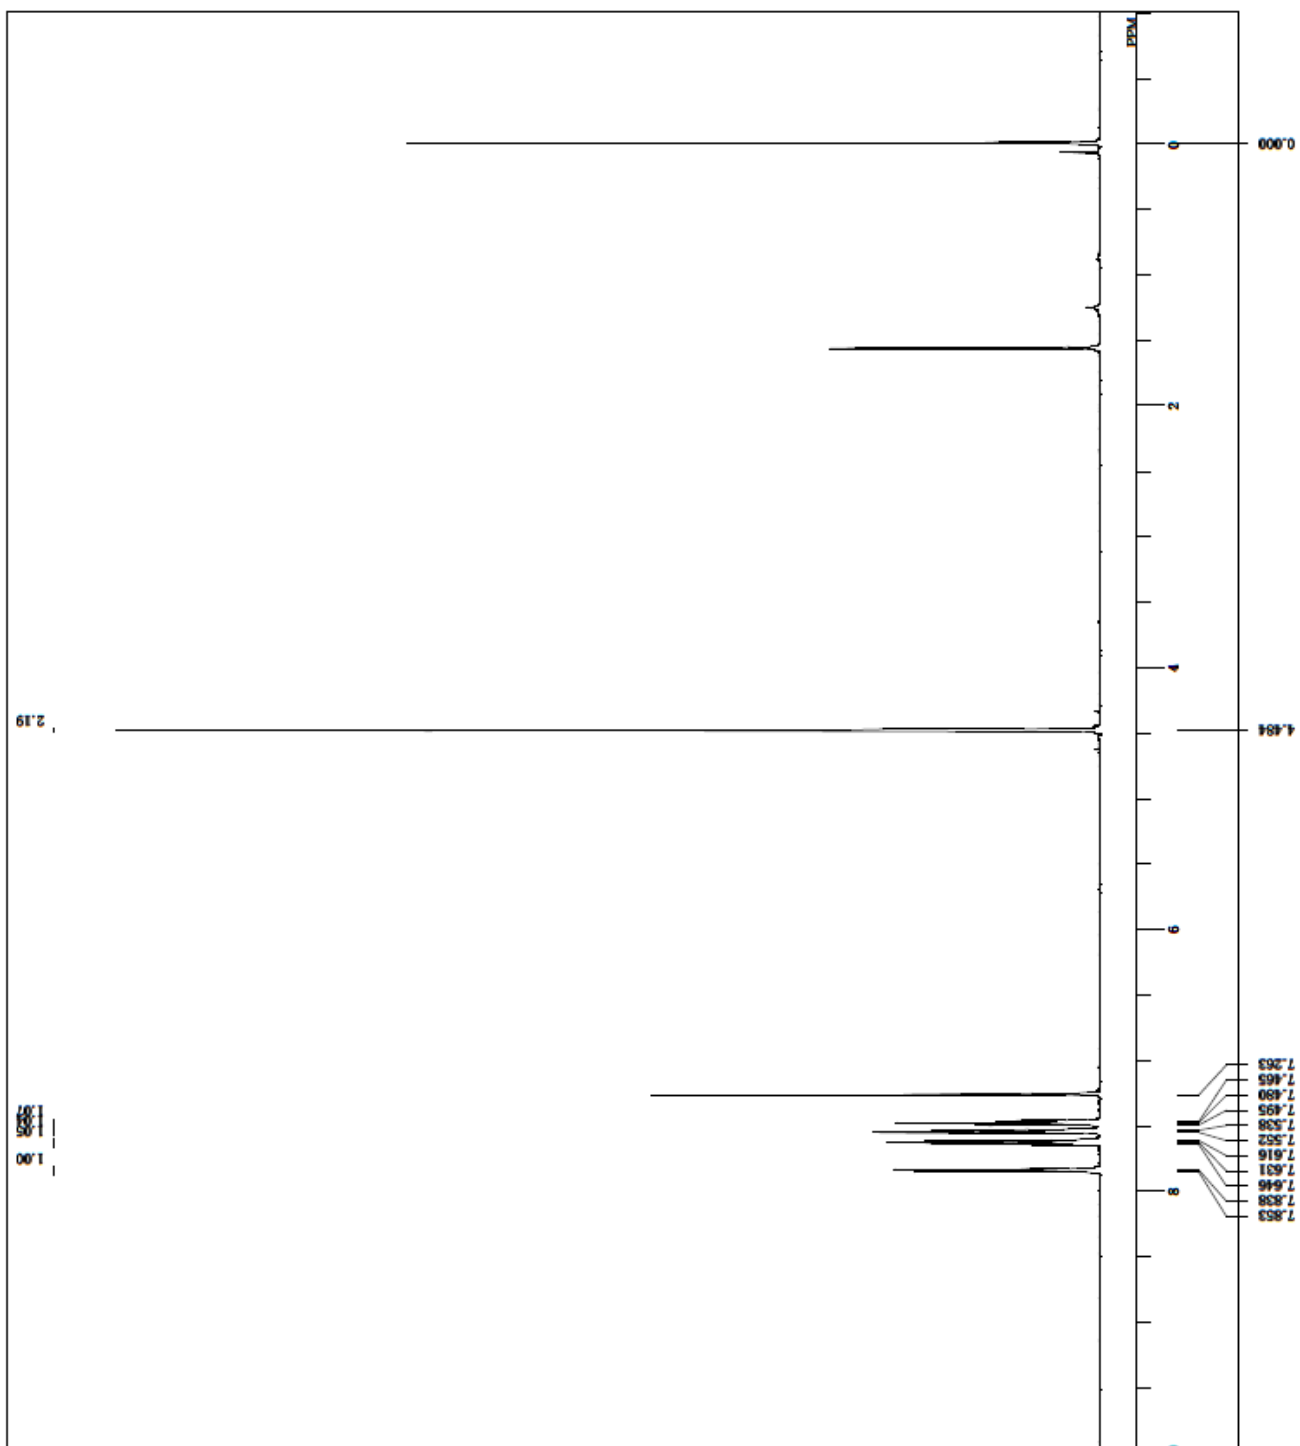

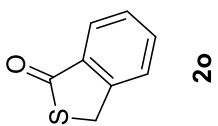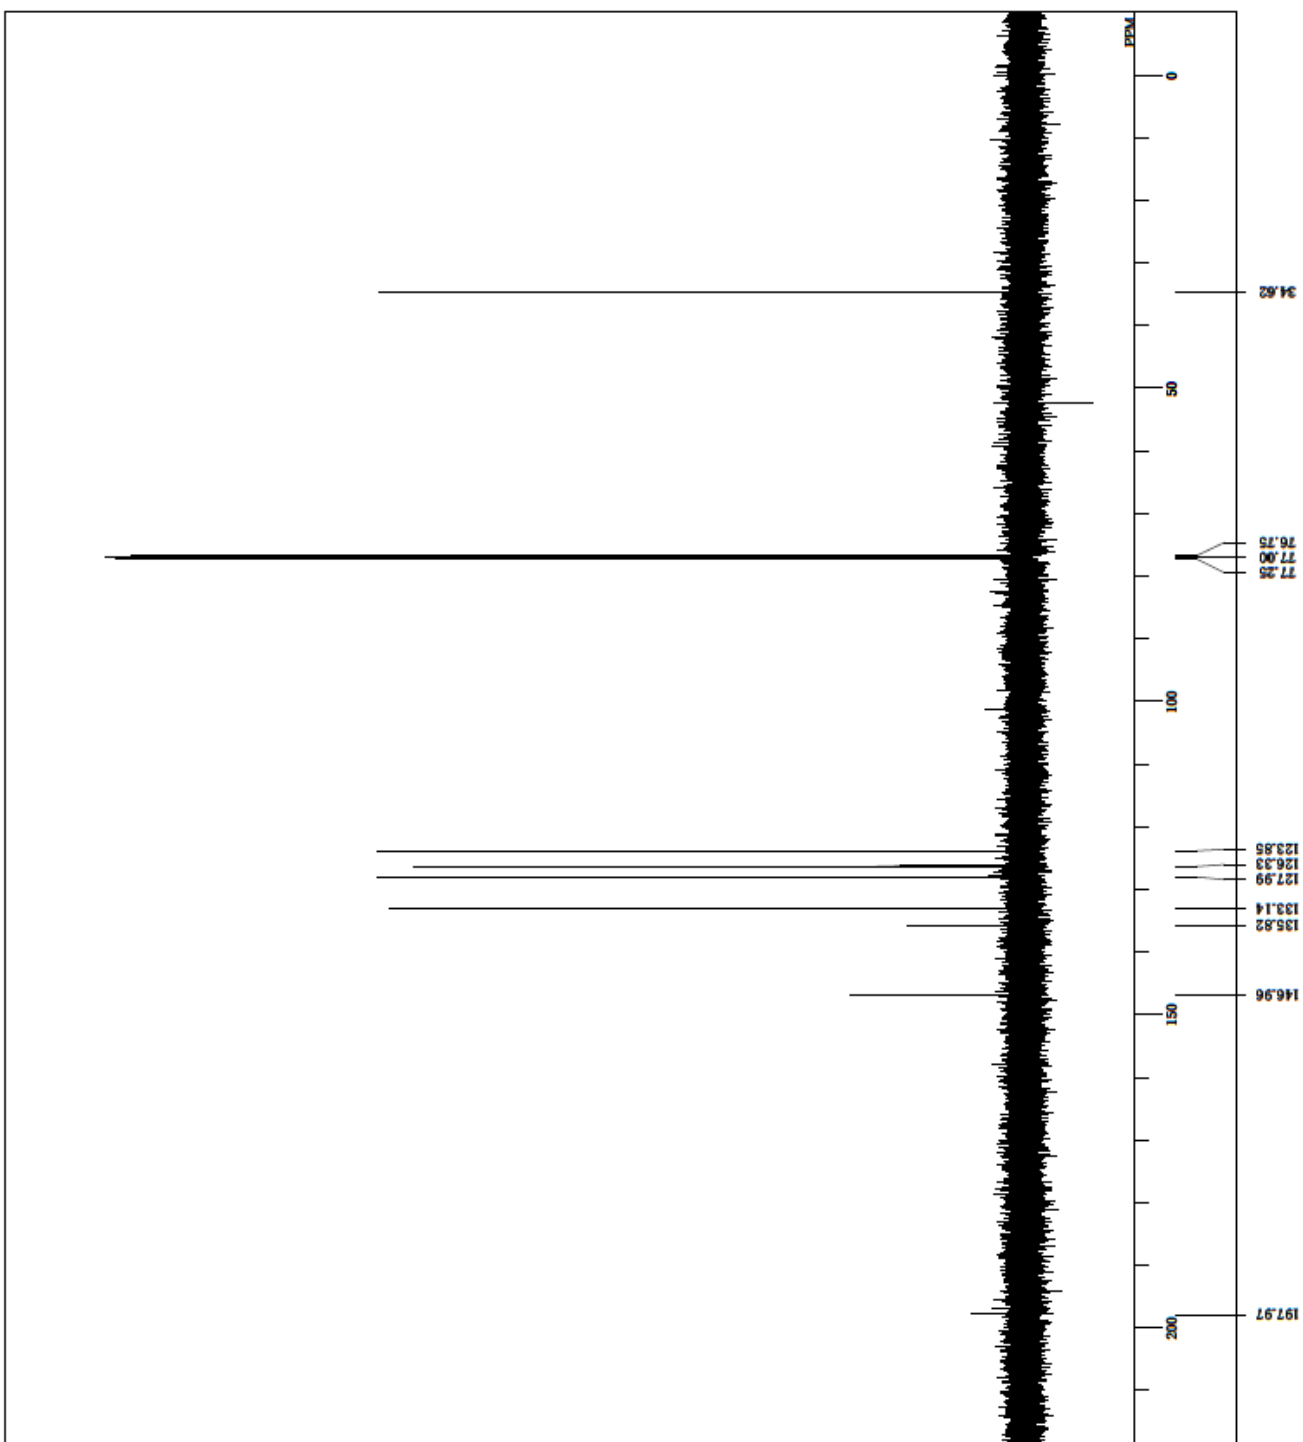

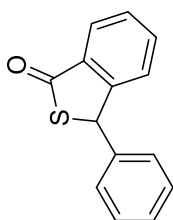

2p

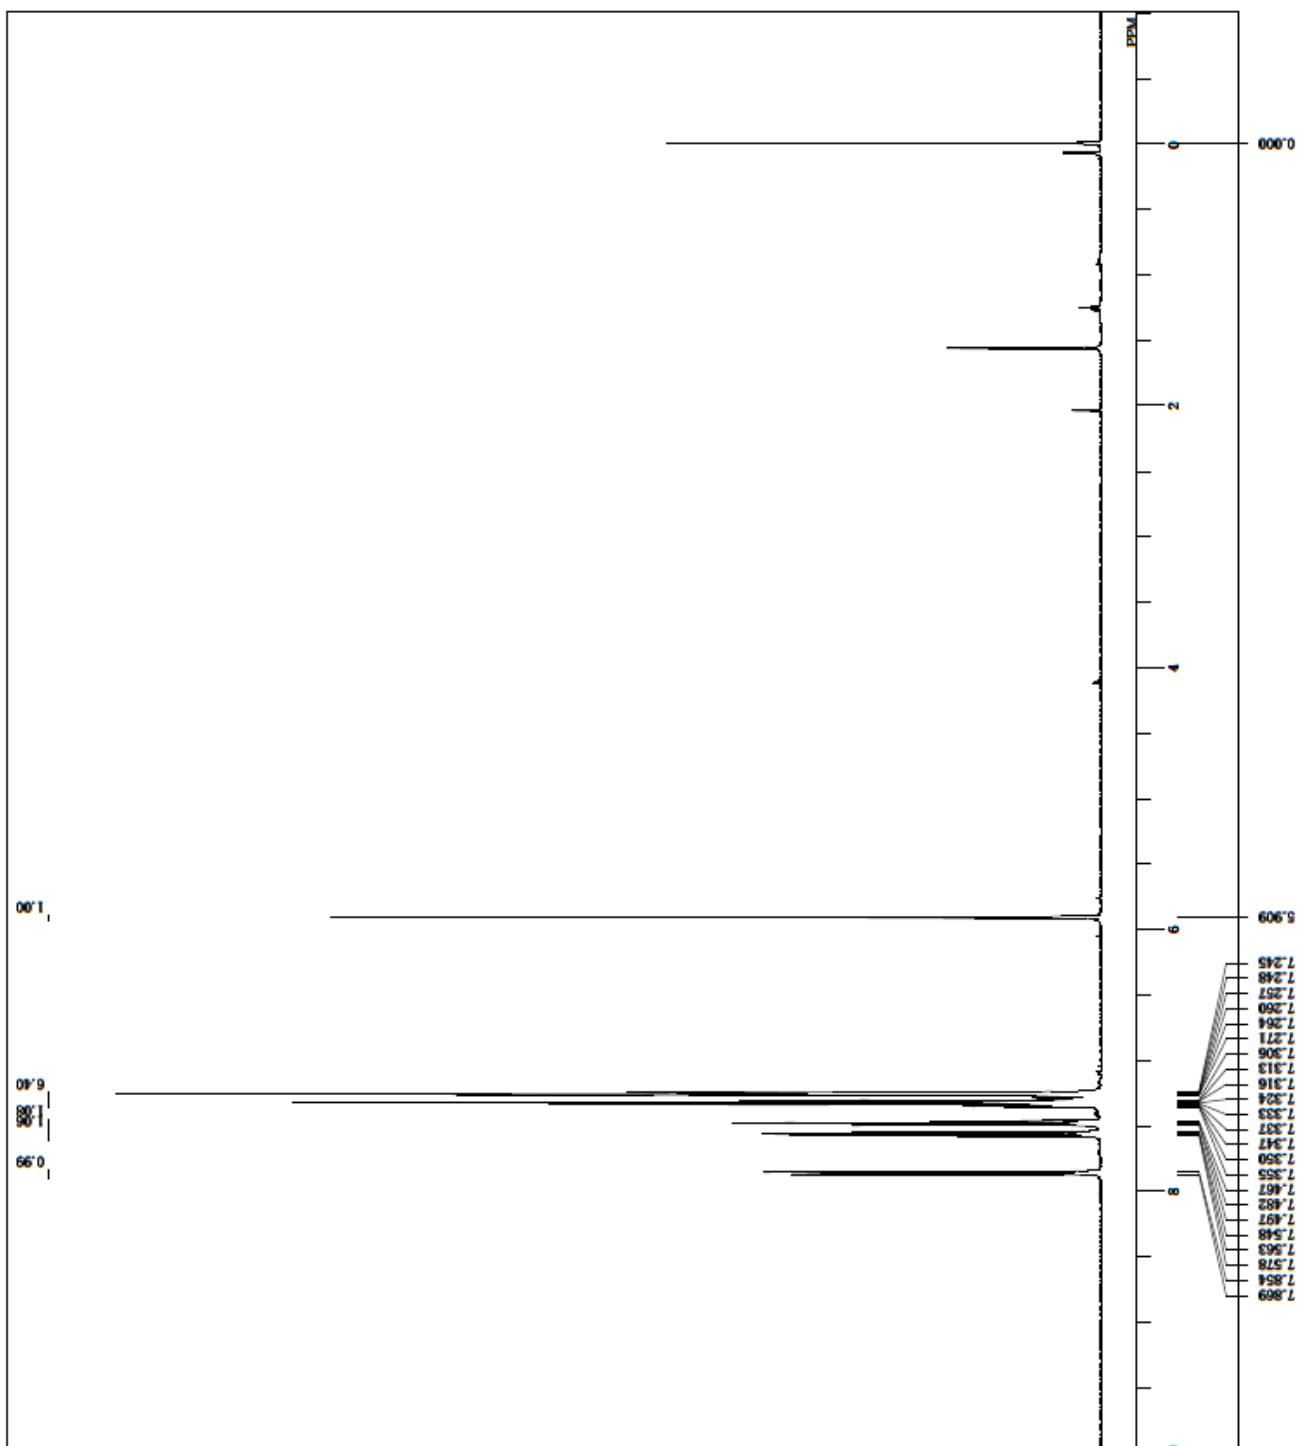

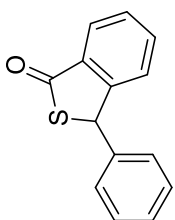

2p

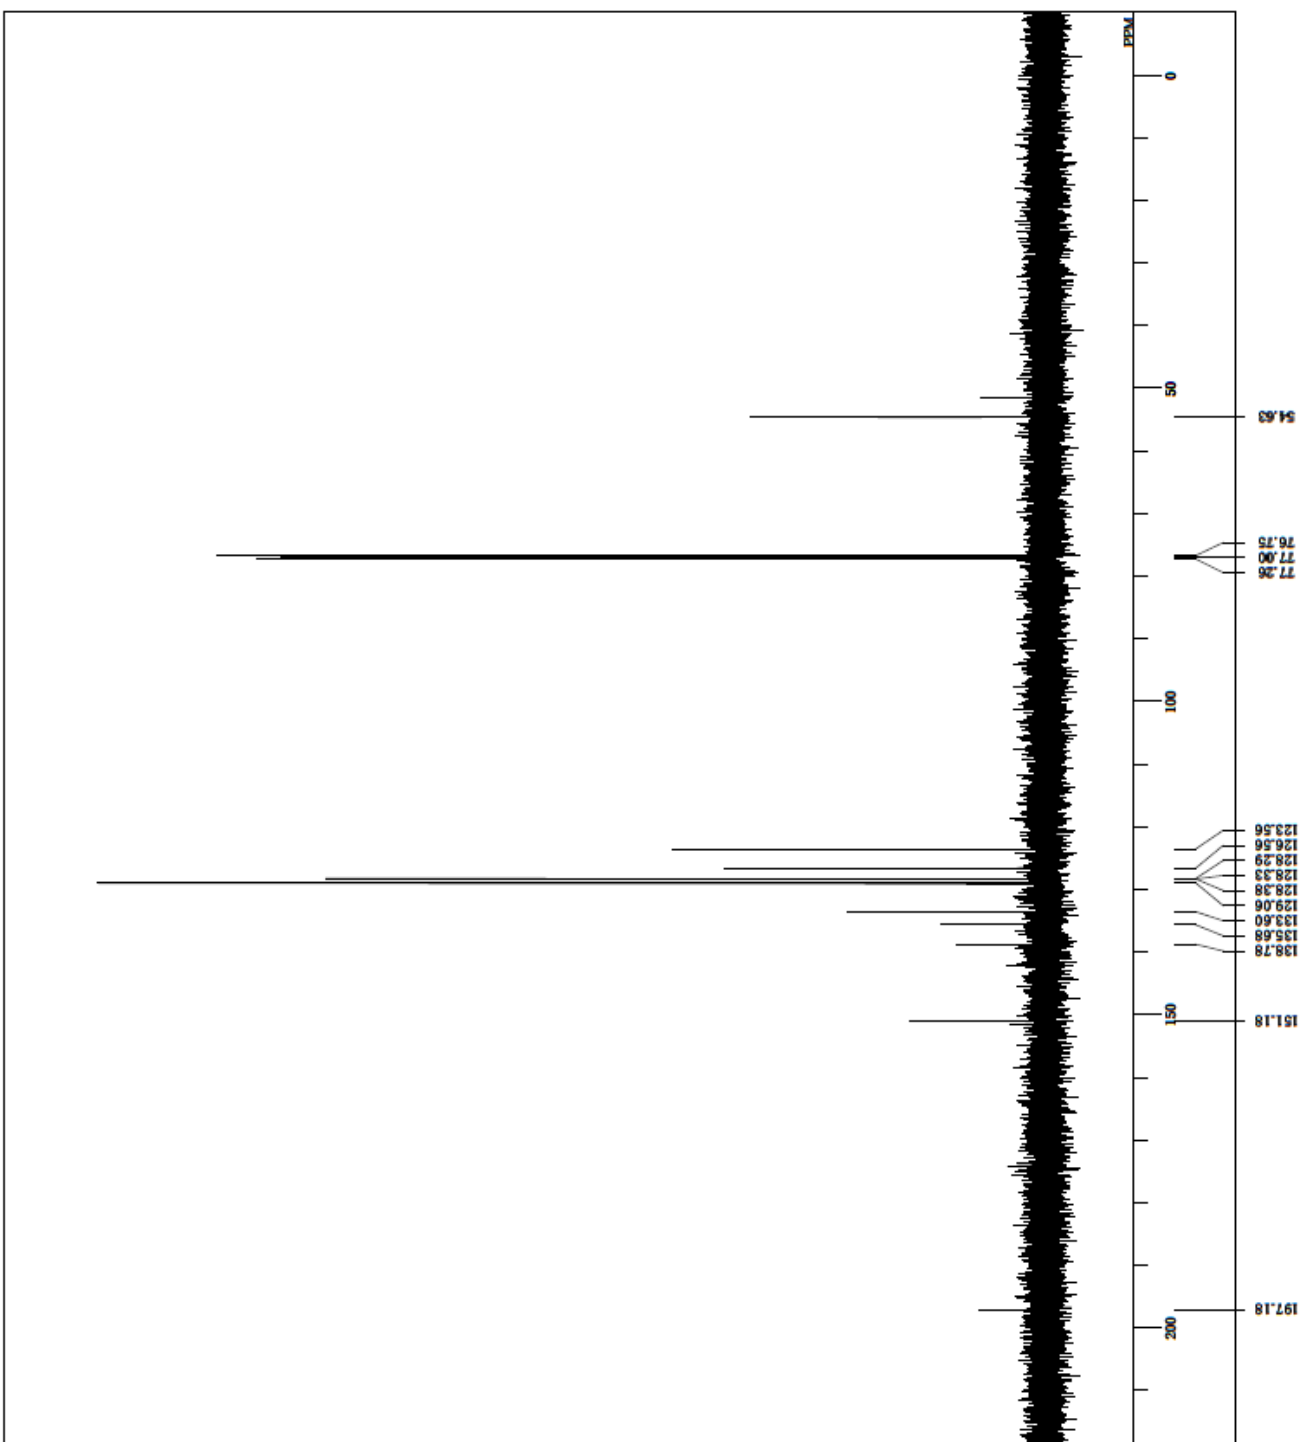

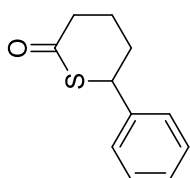

2q

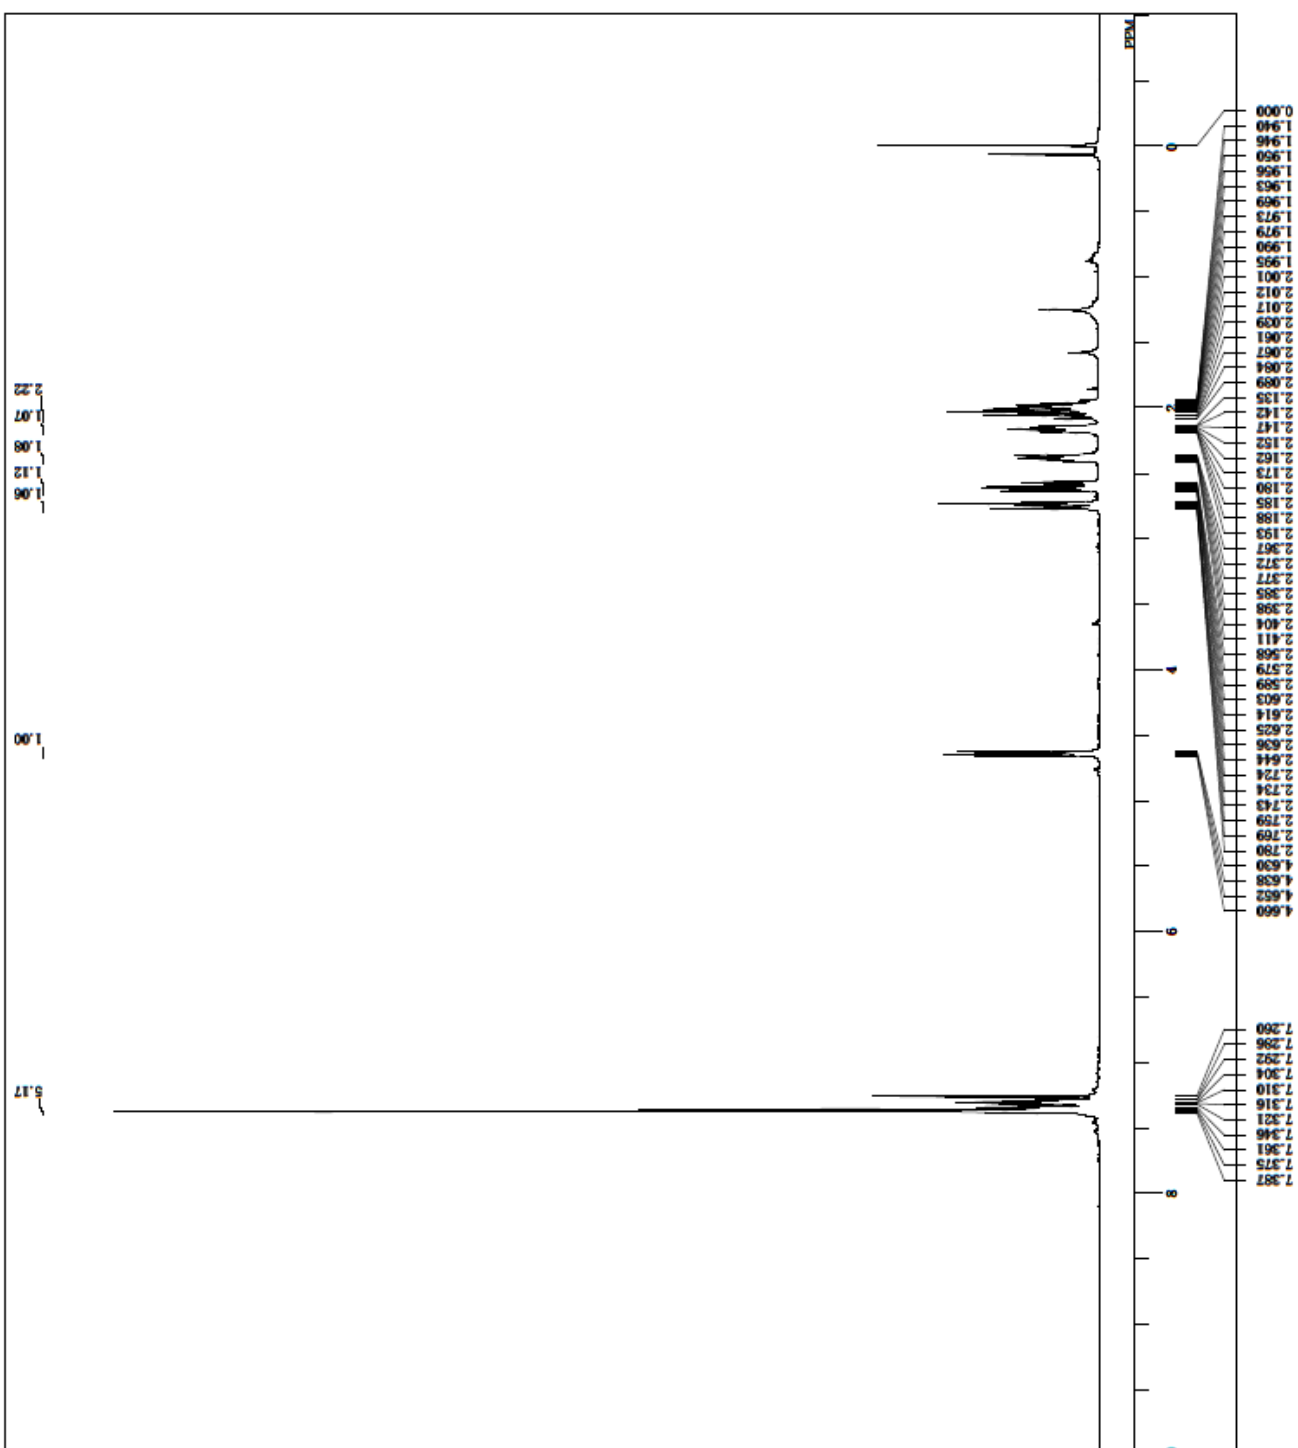



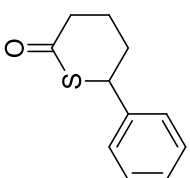

2q

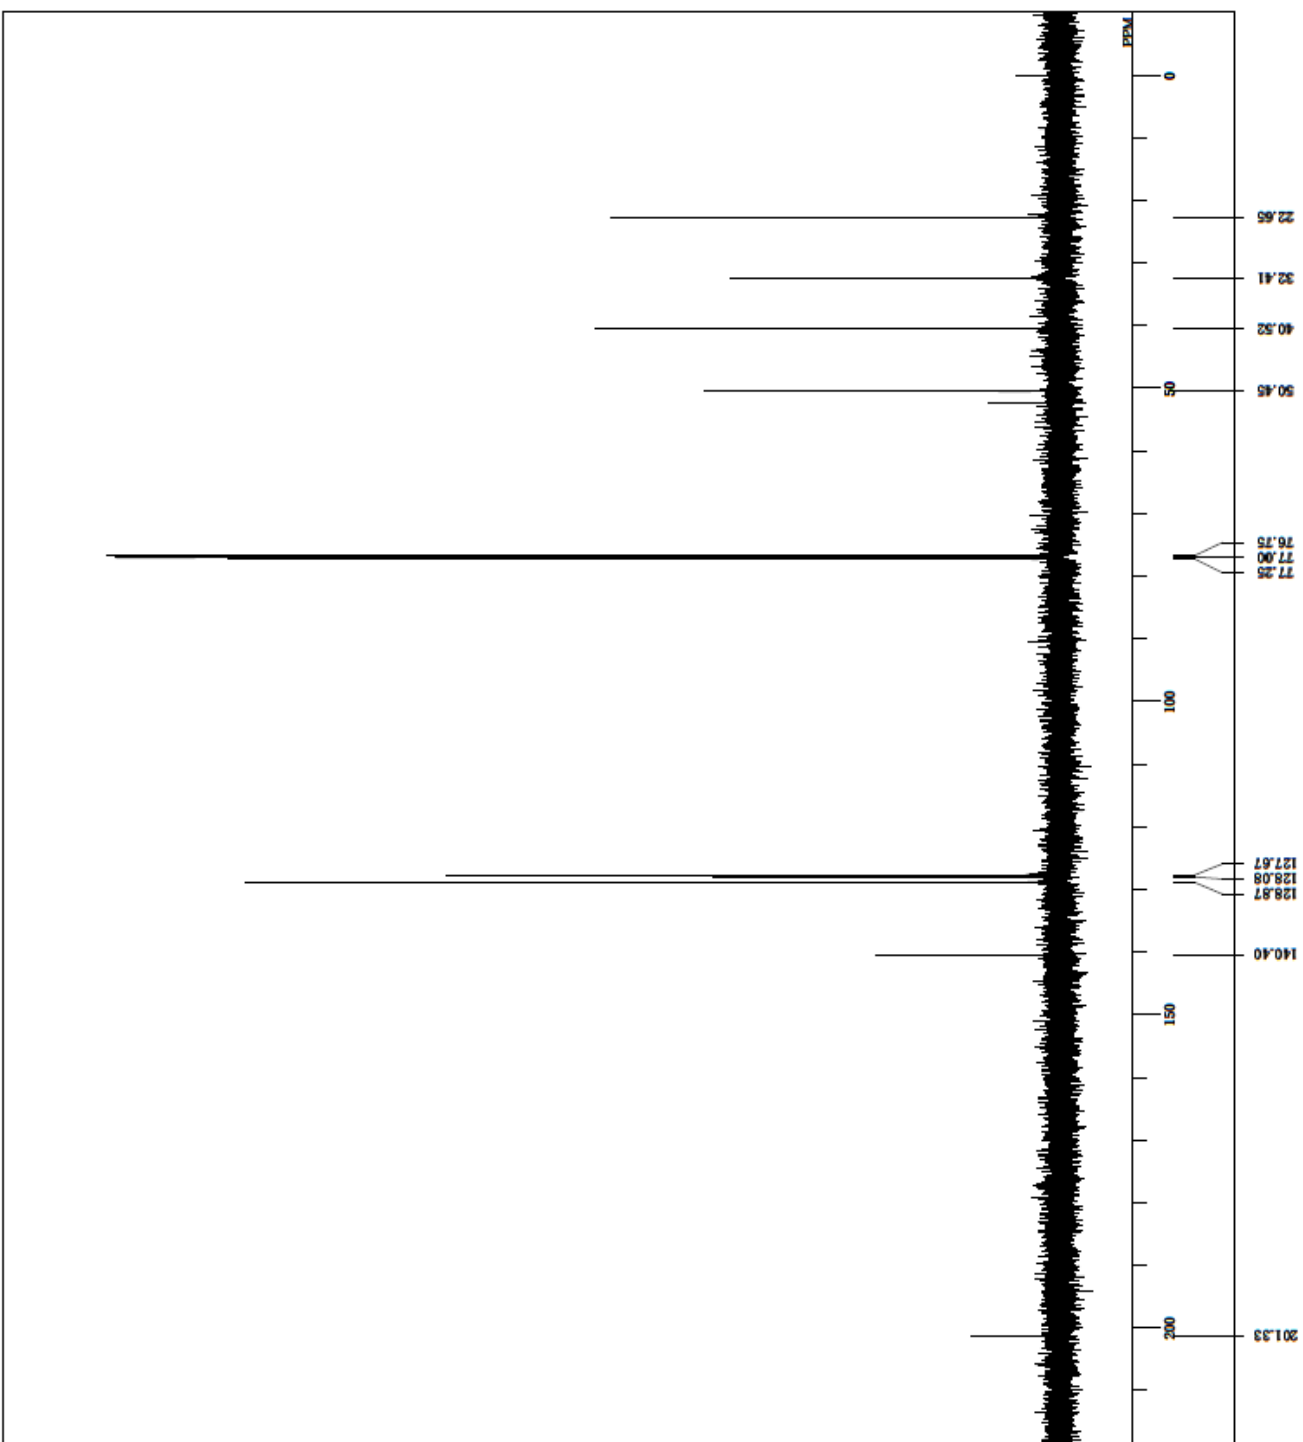

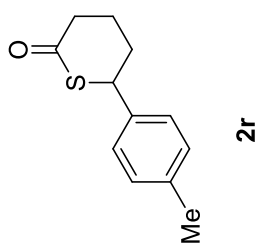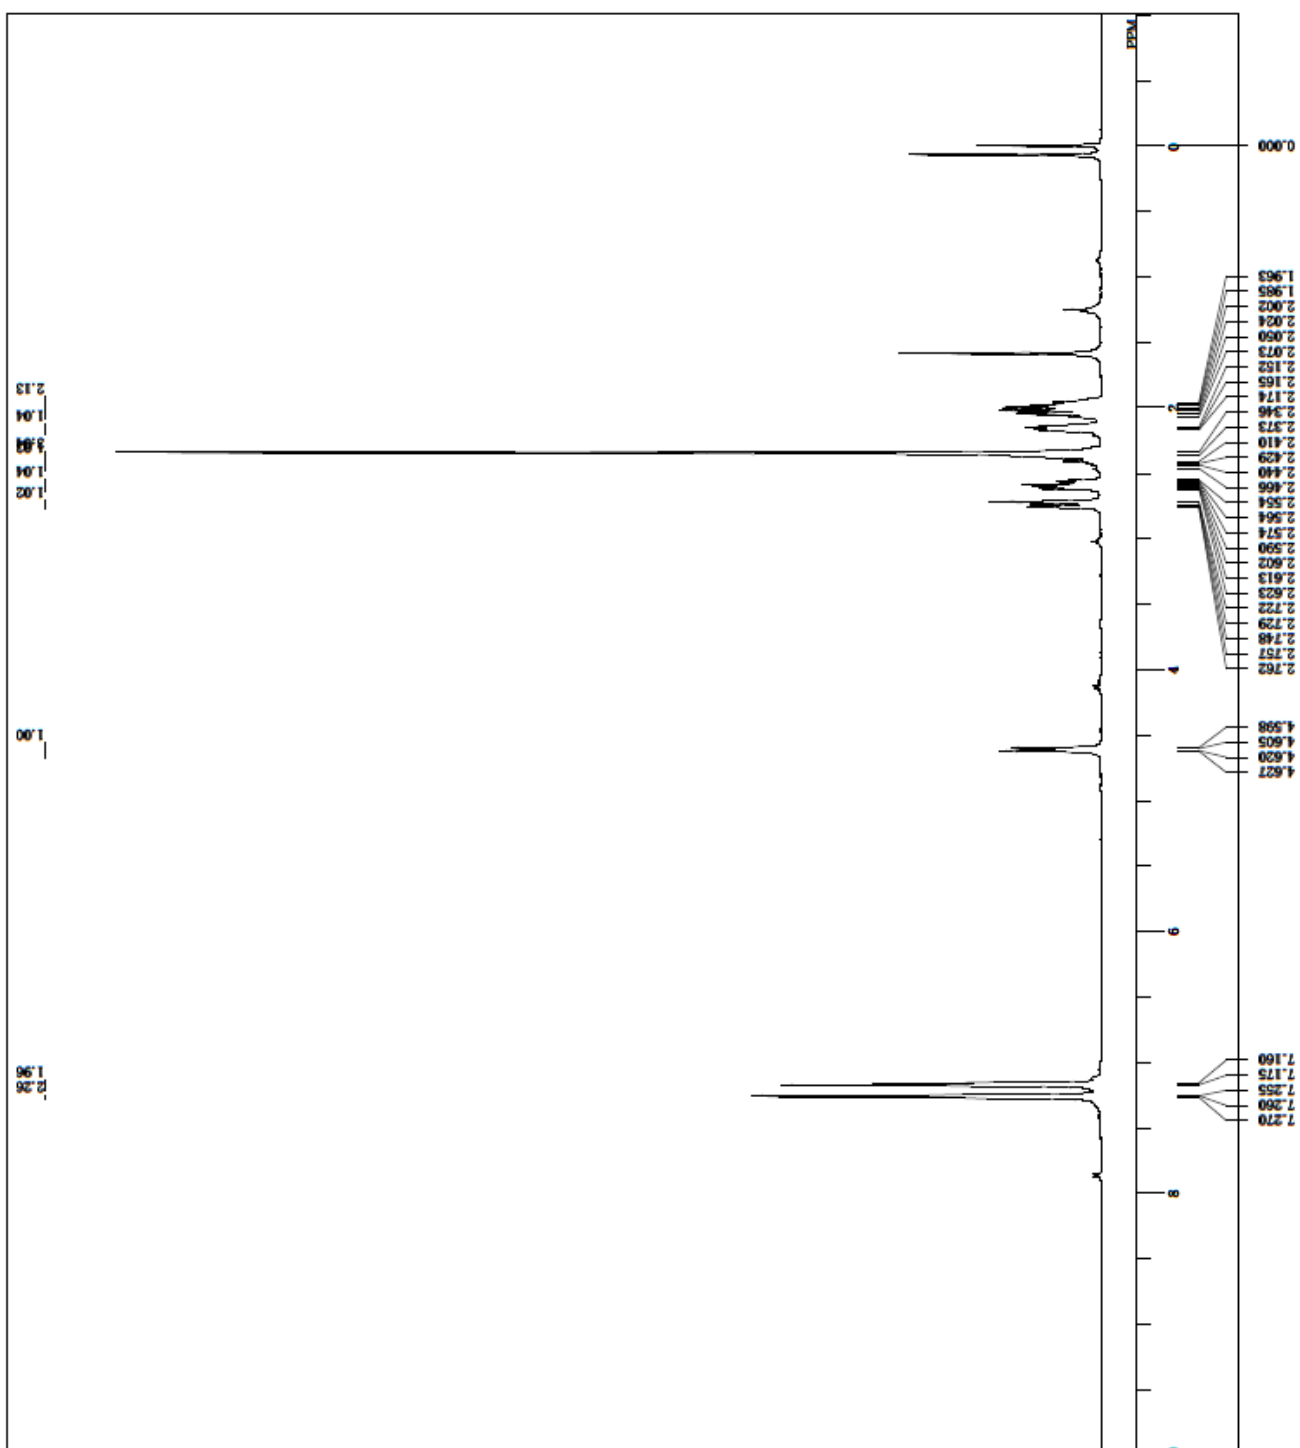

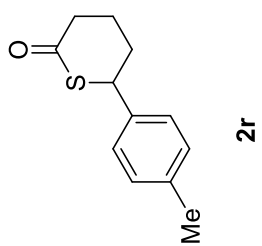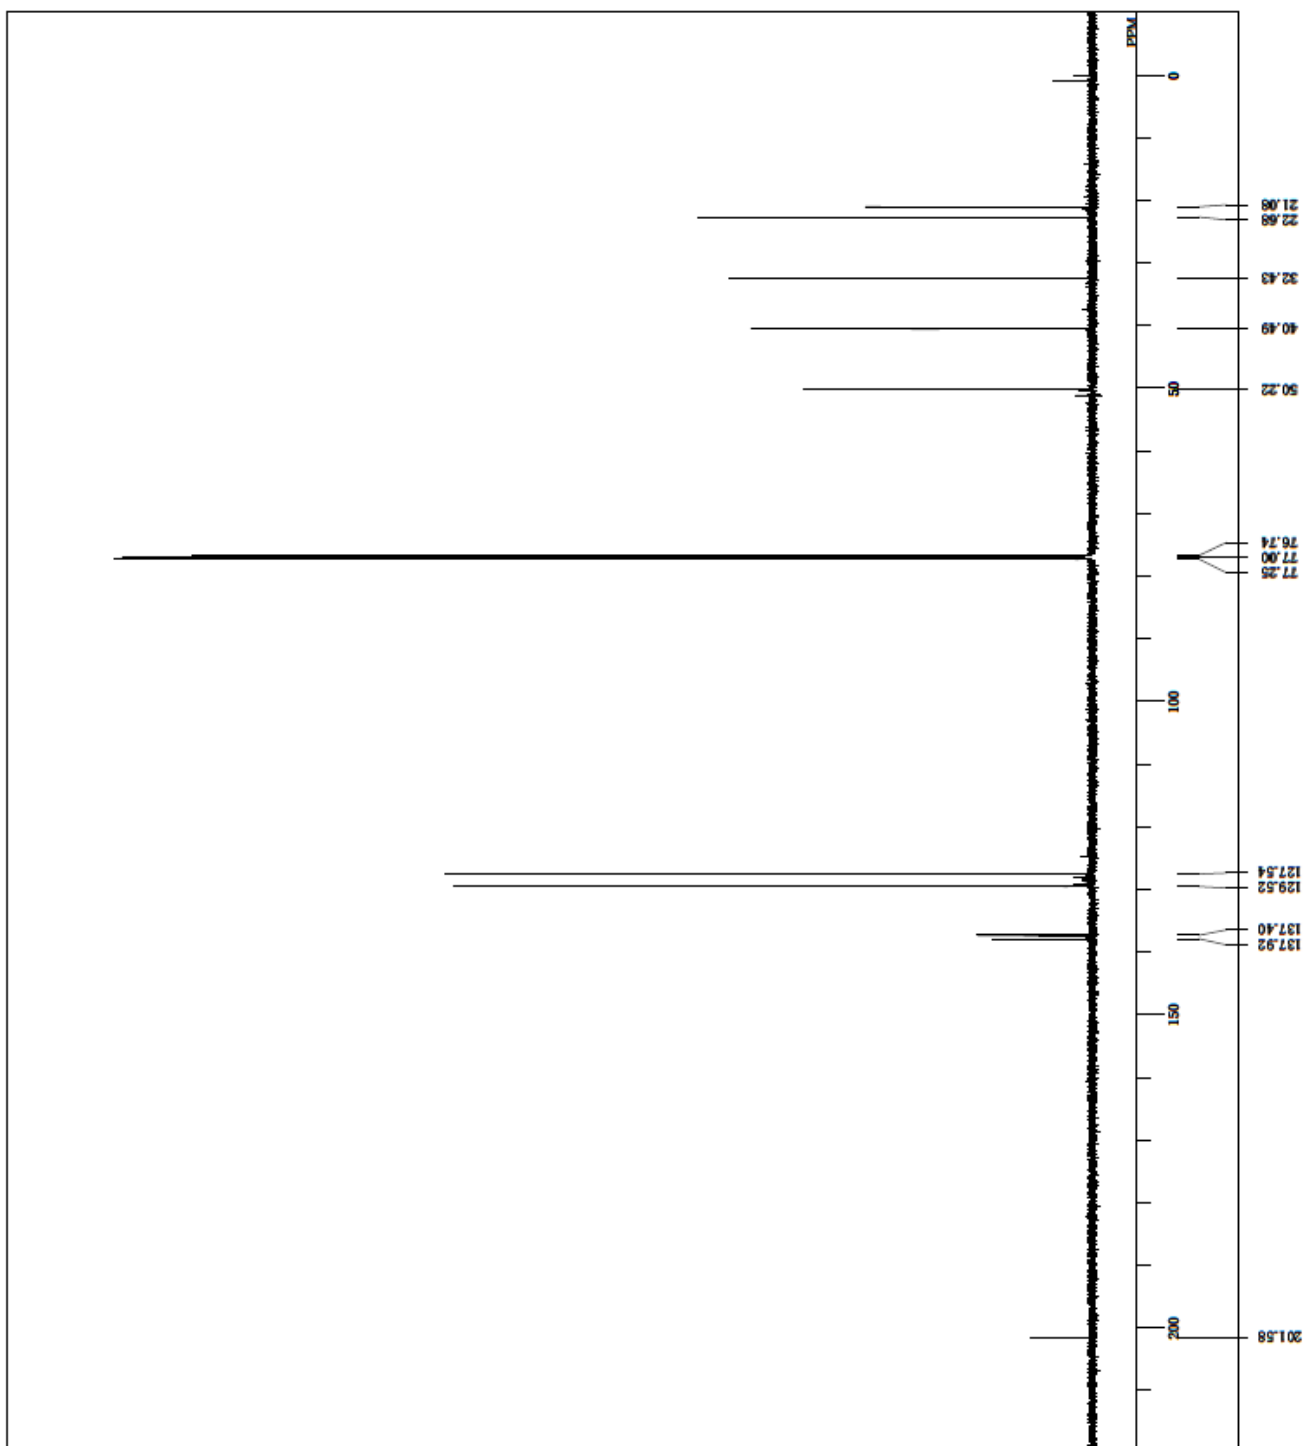

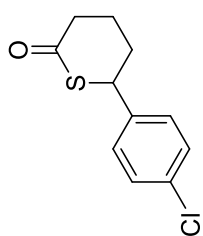

2s

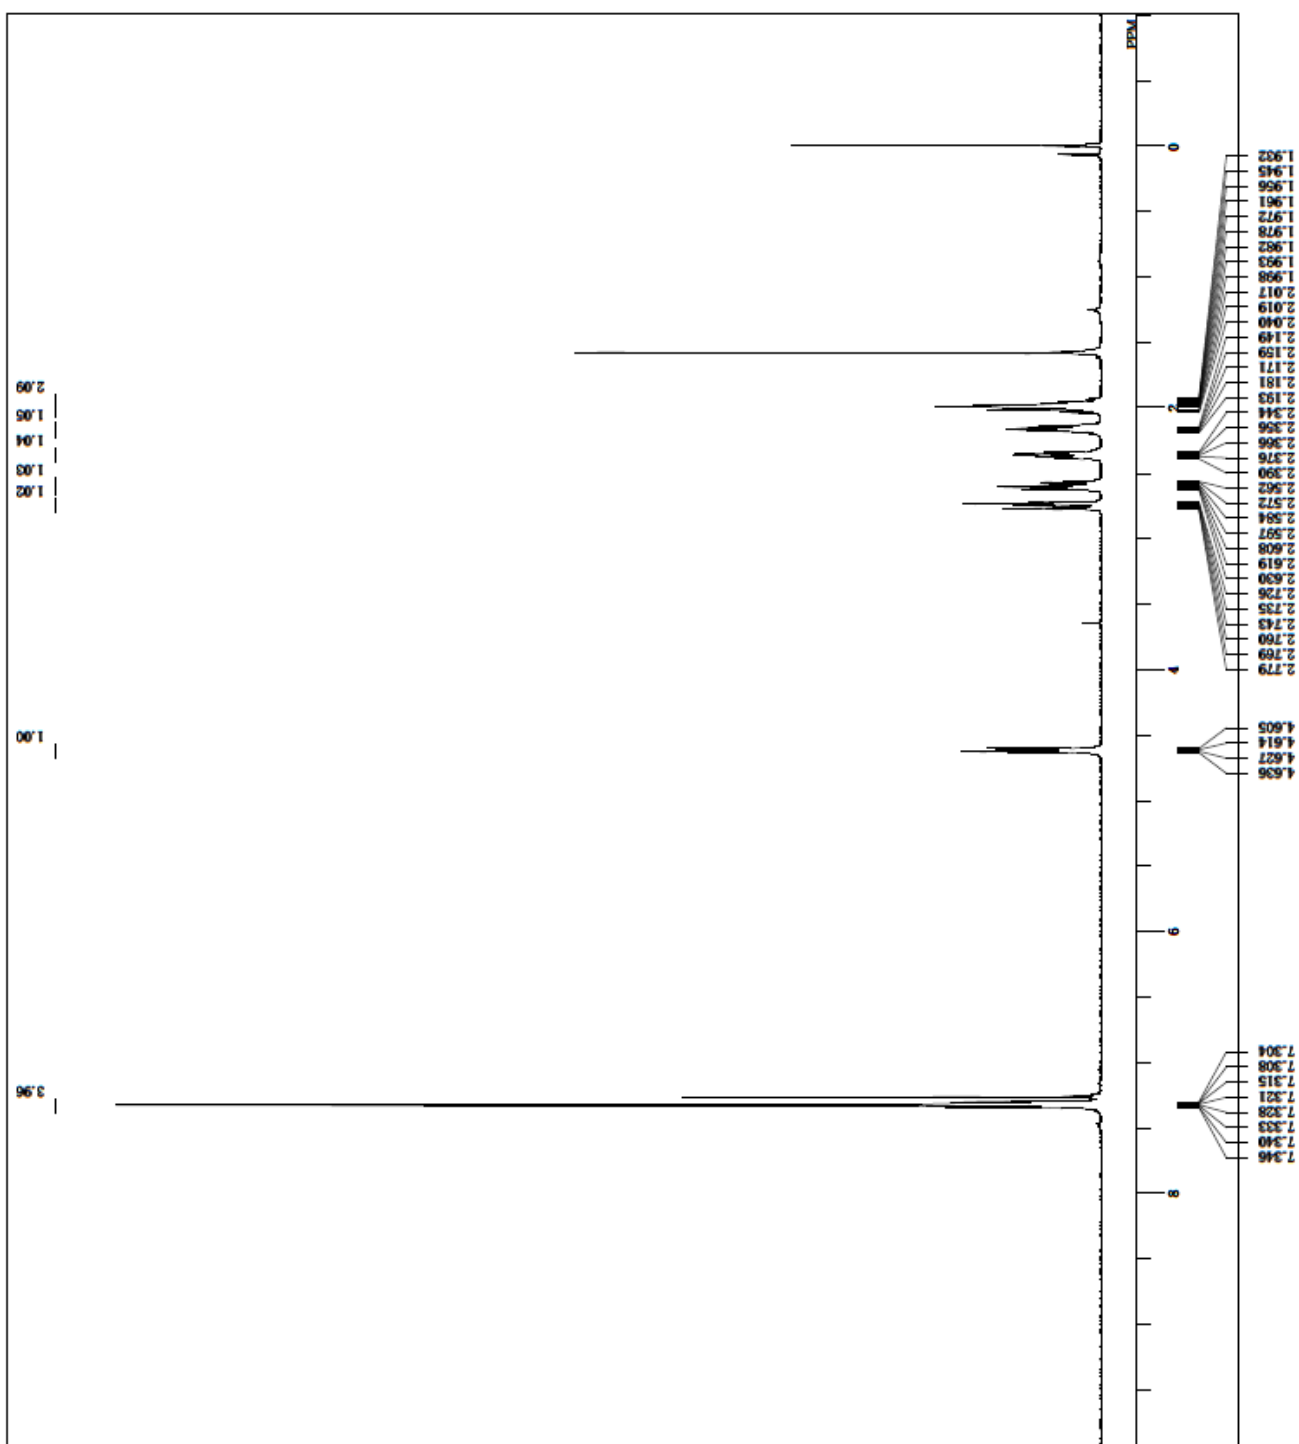

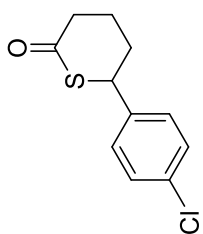

2s

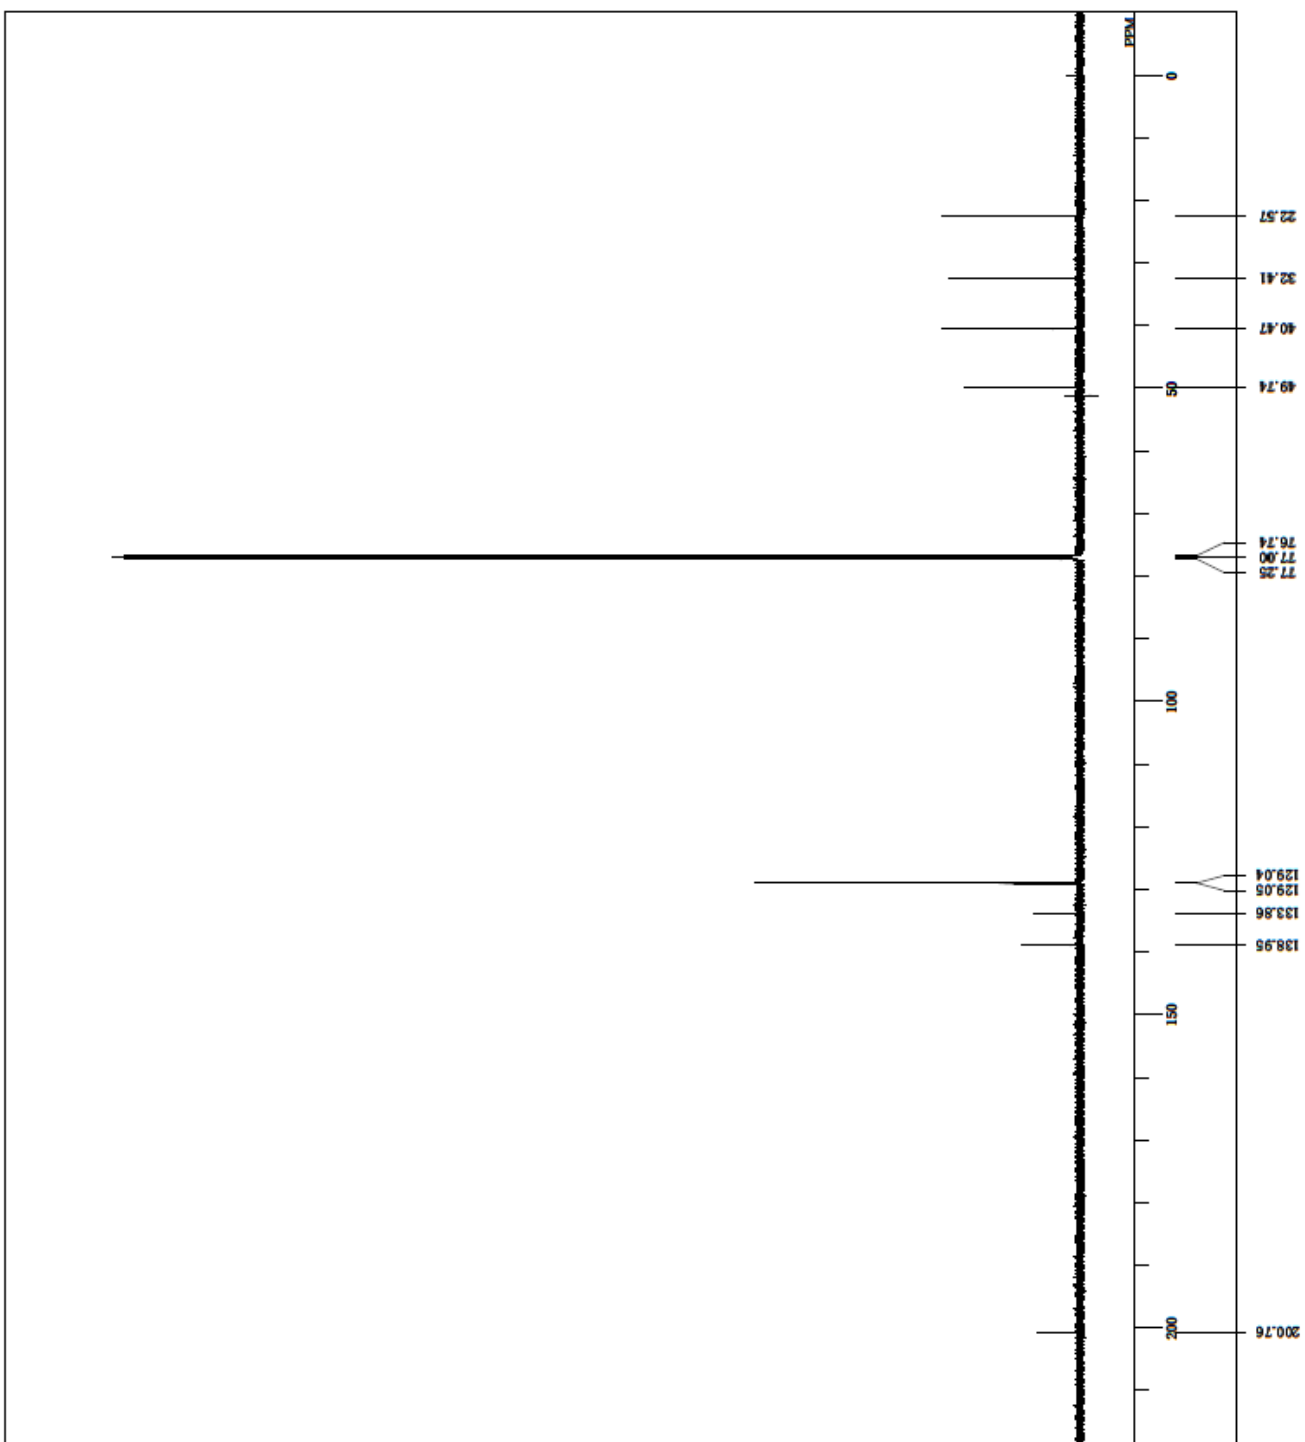

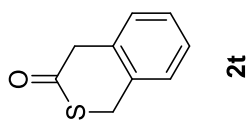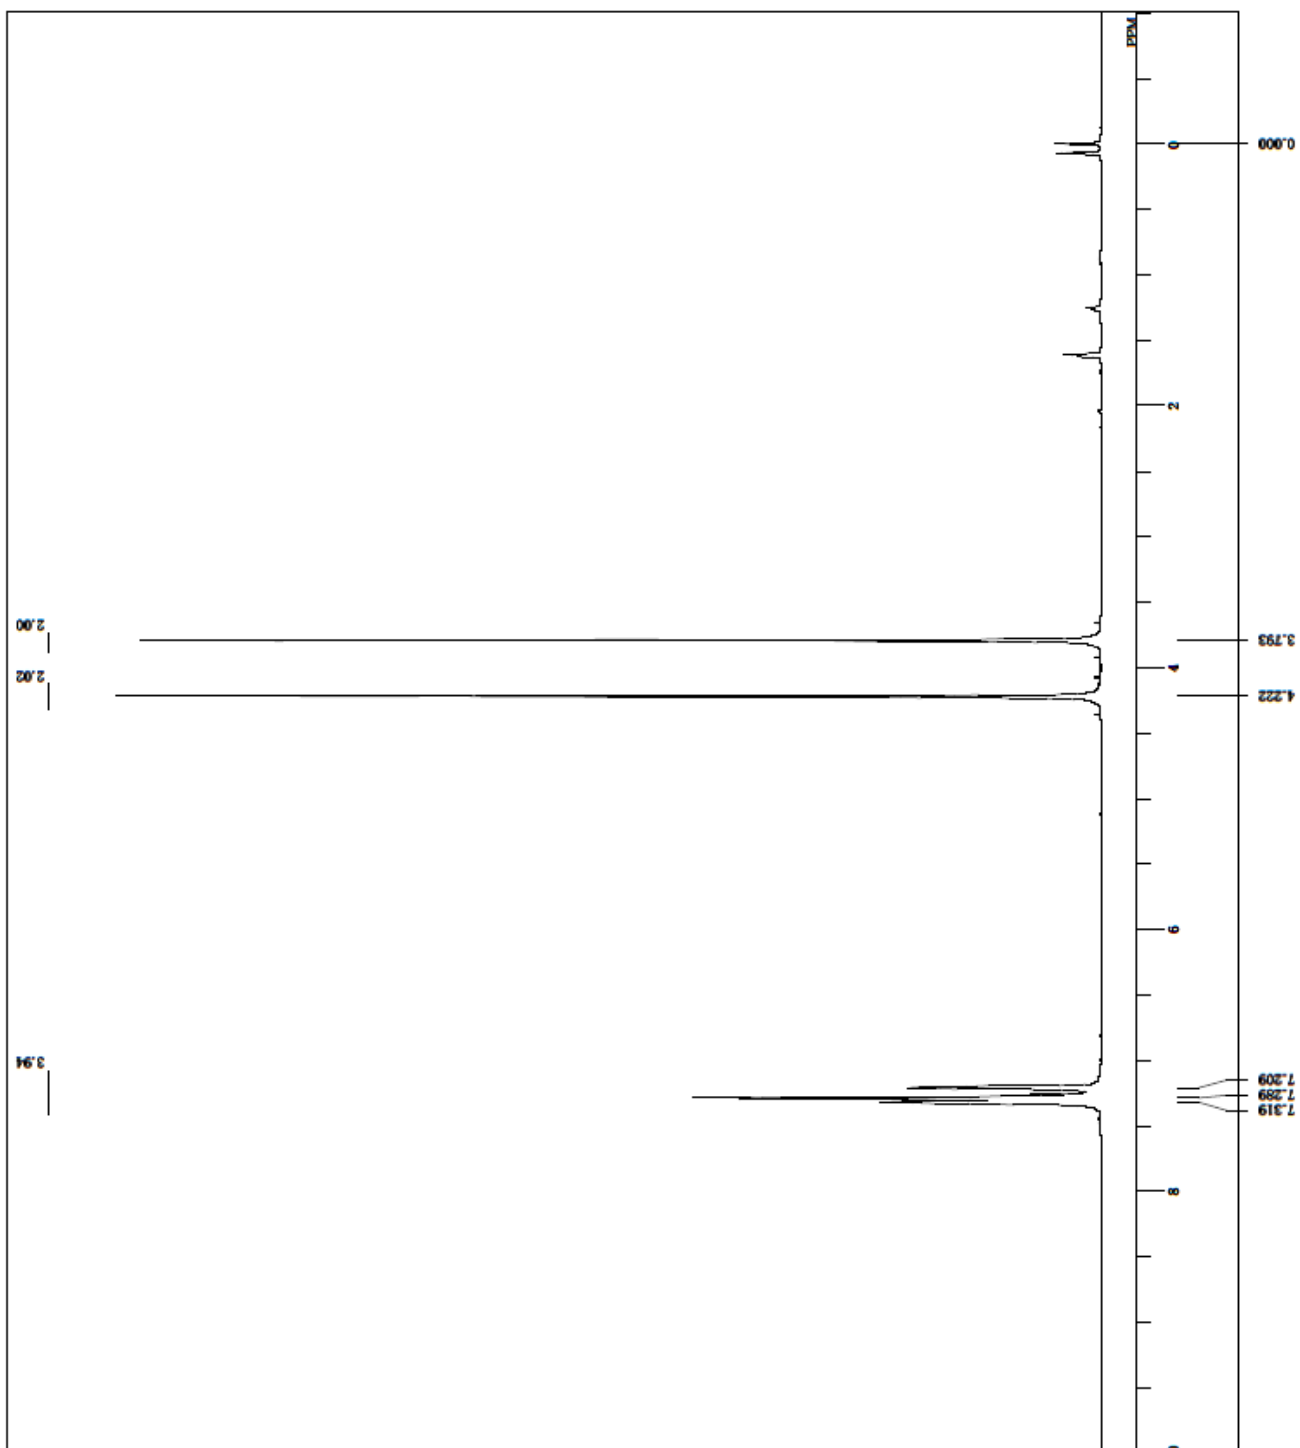

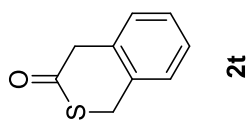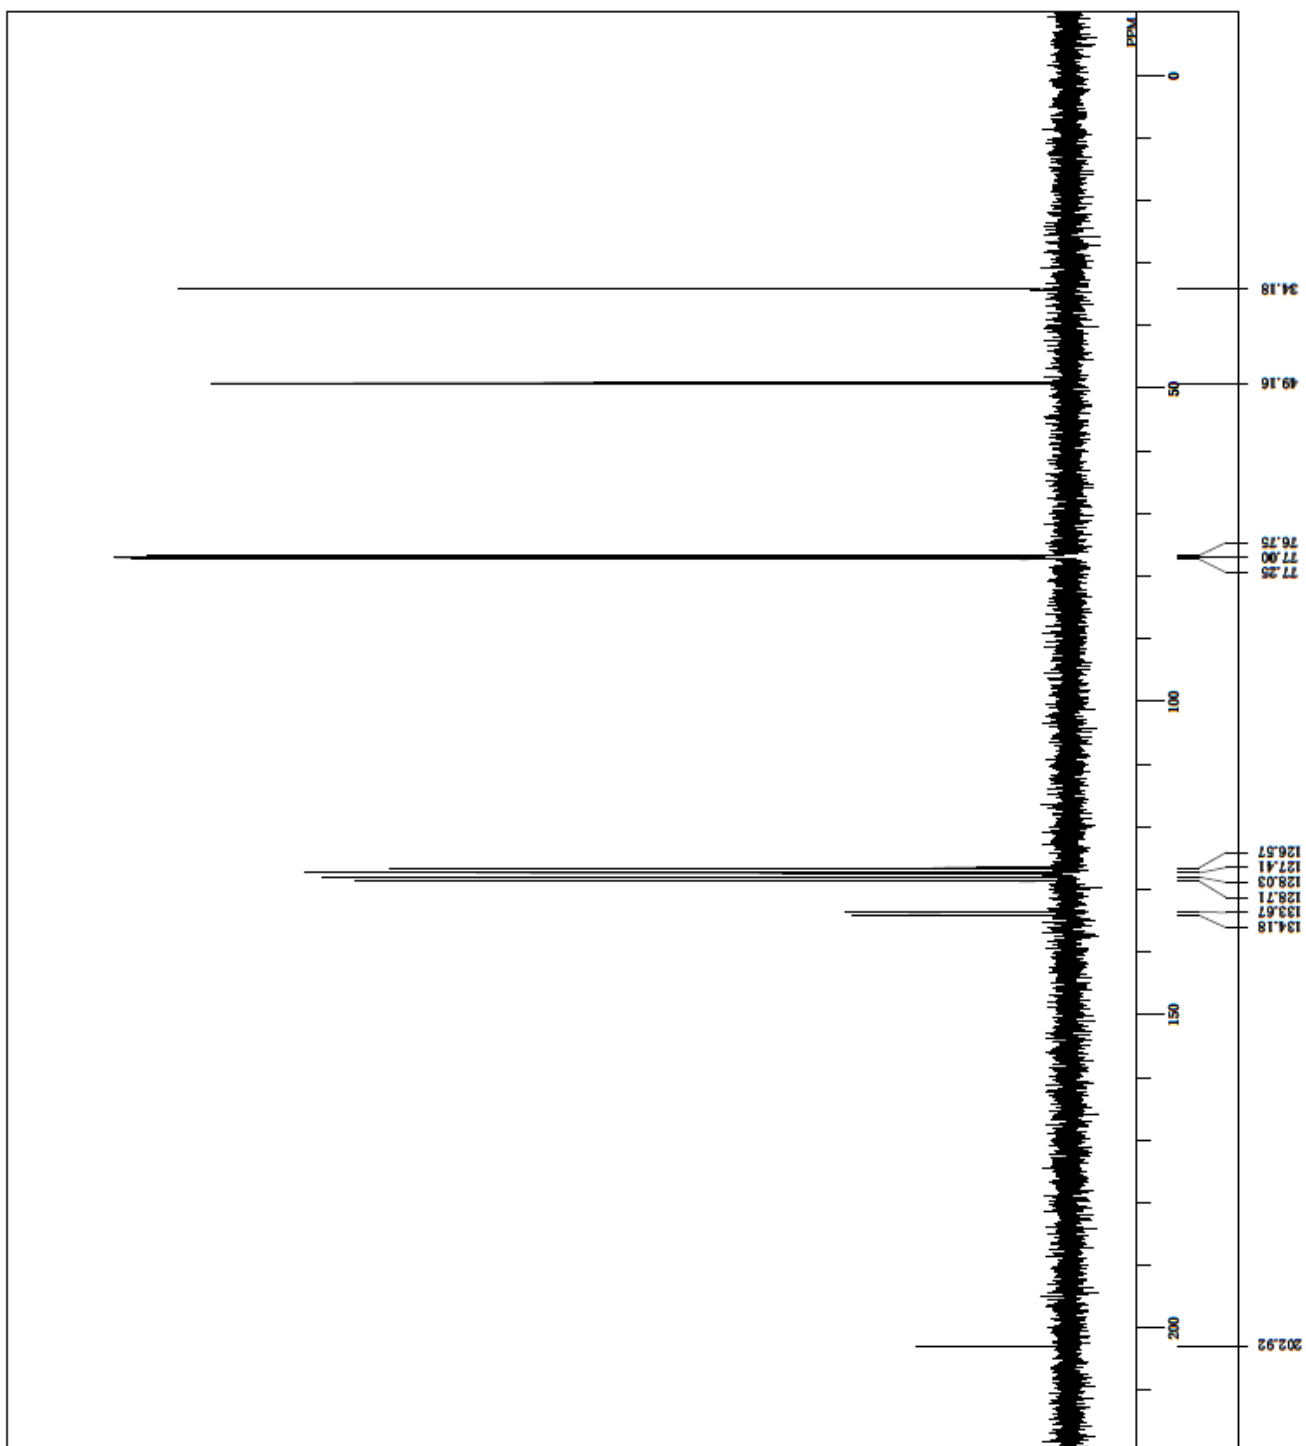

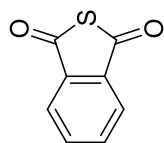

2u

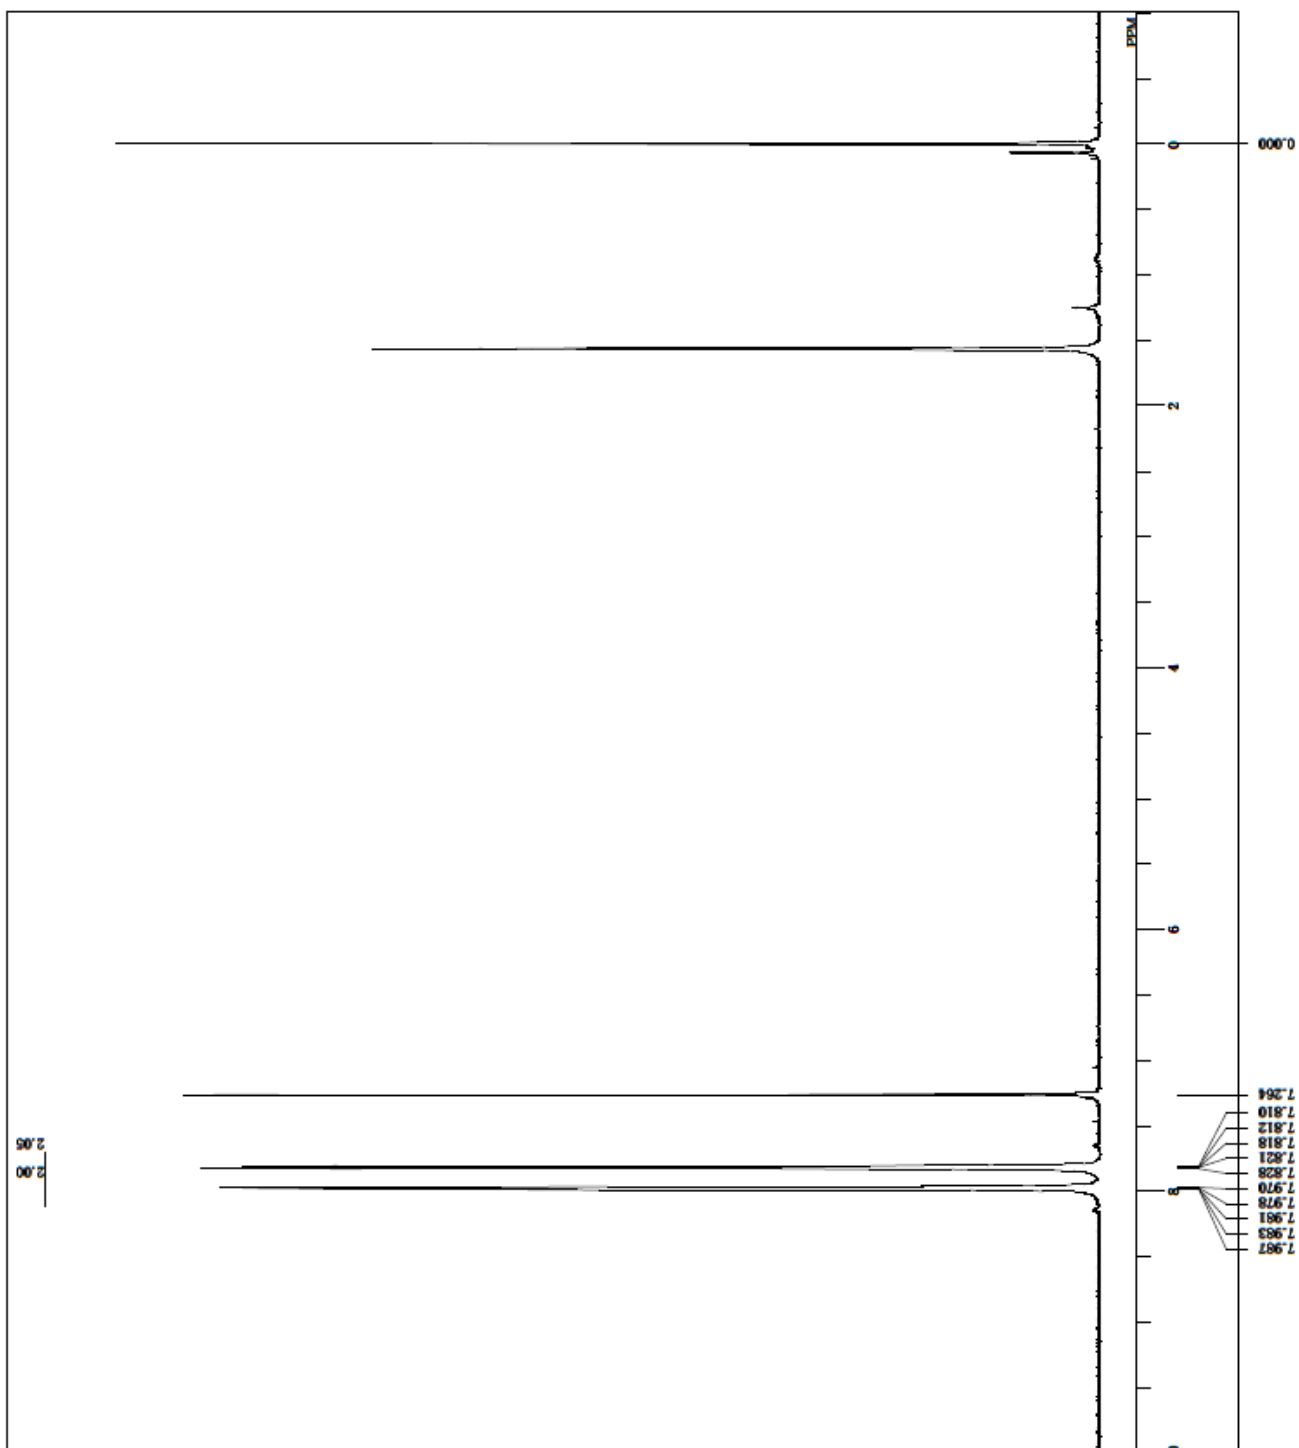



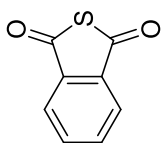

2u

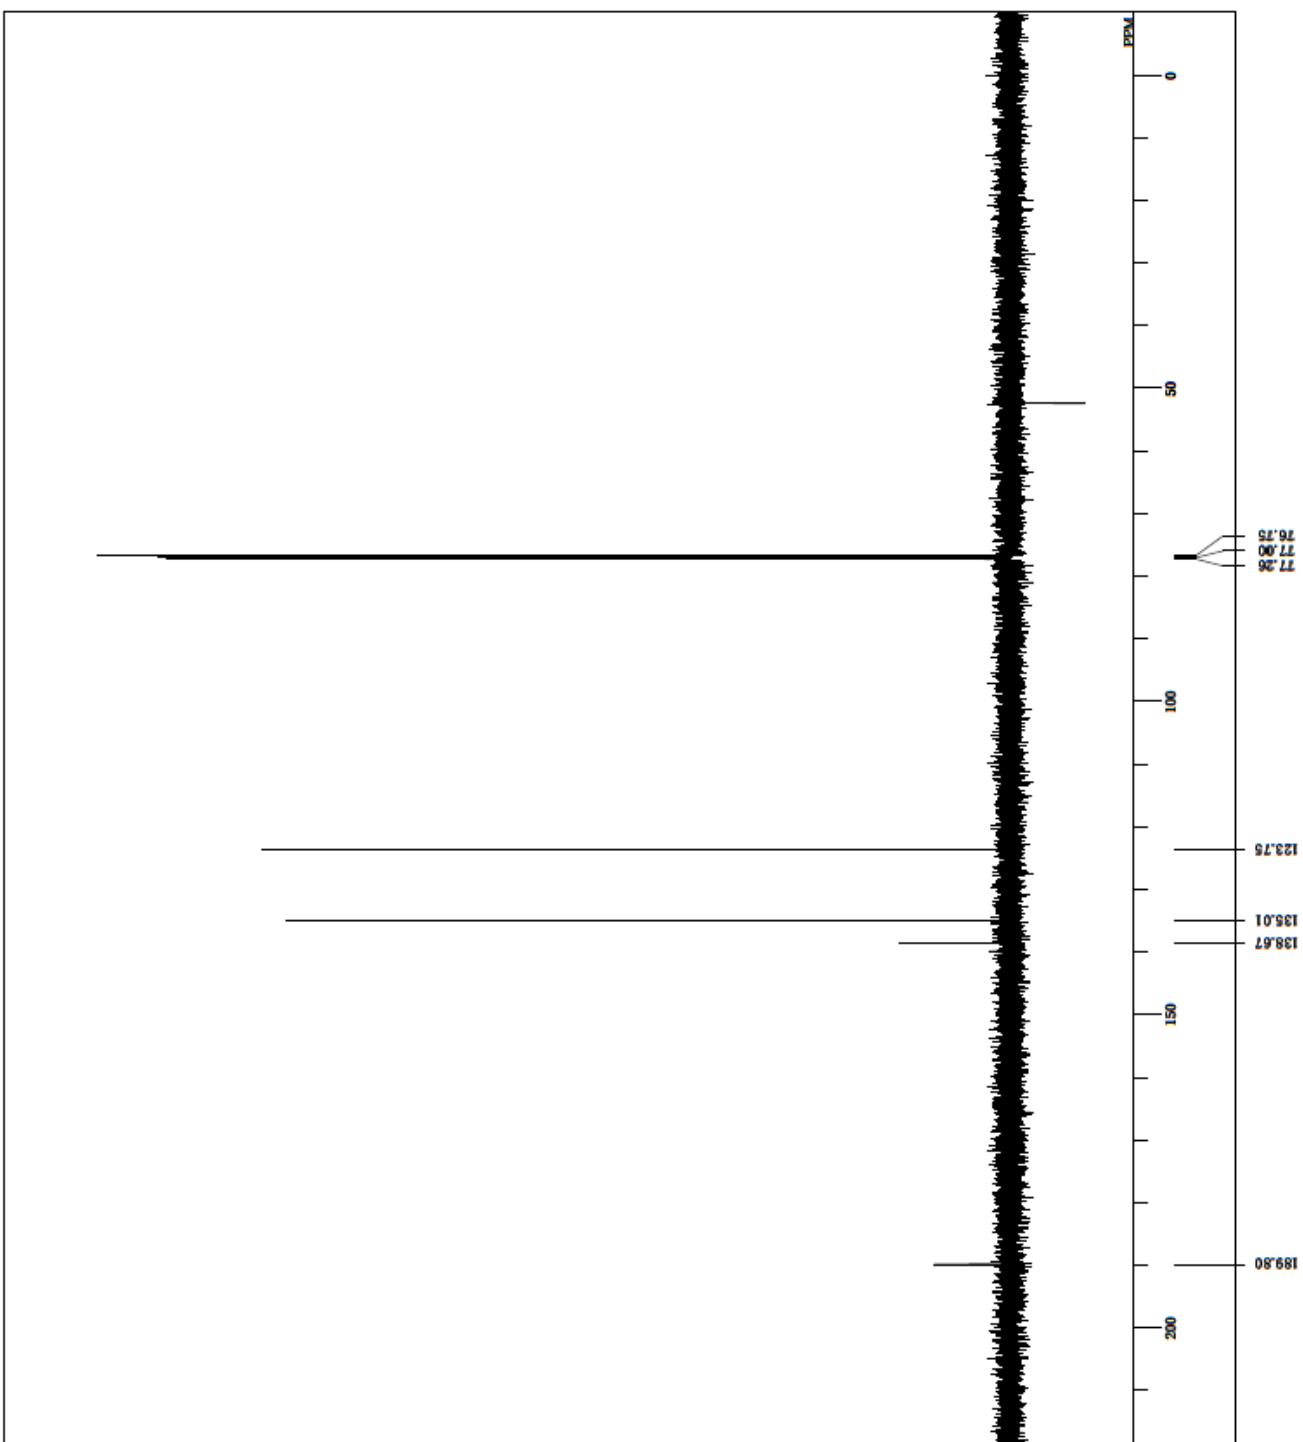

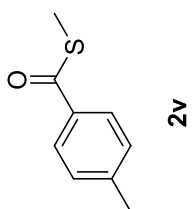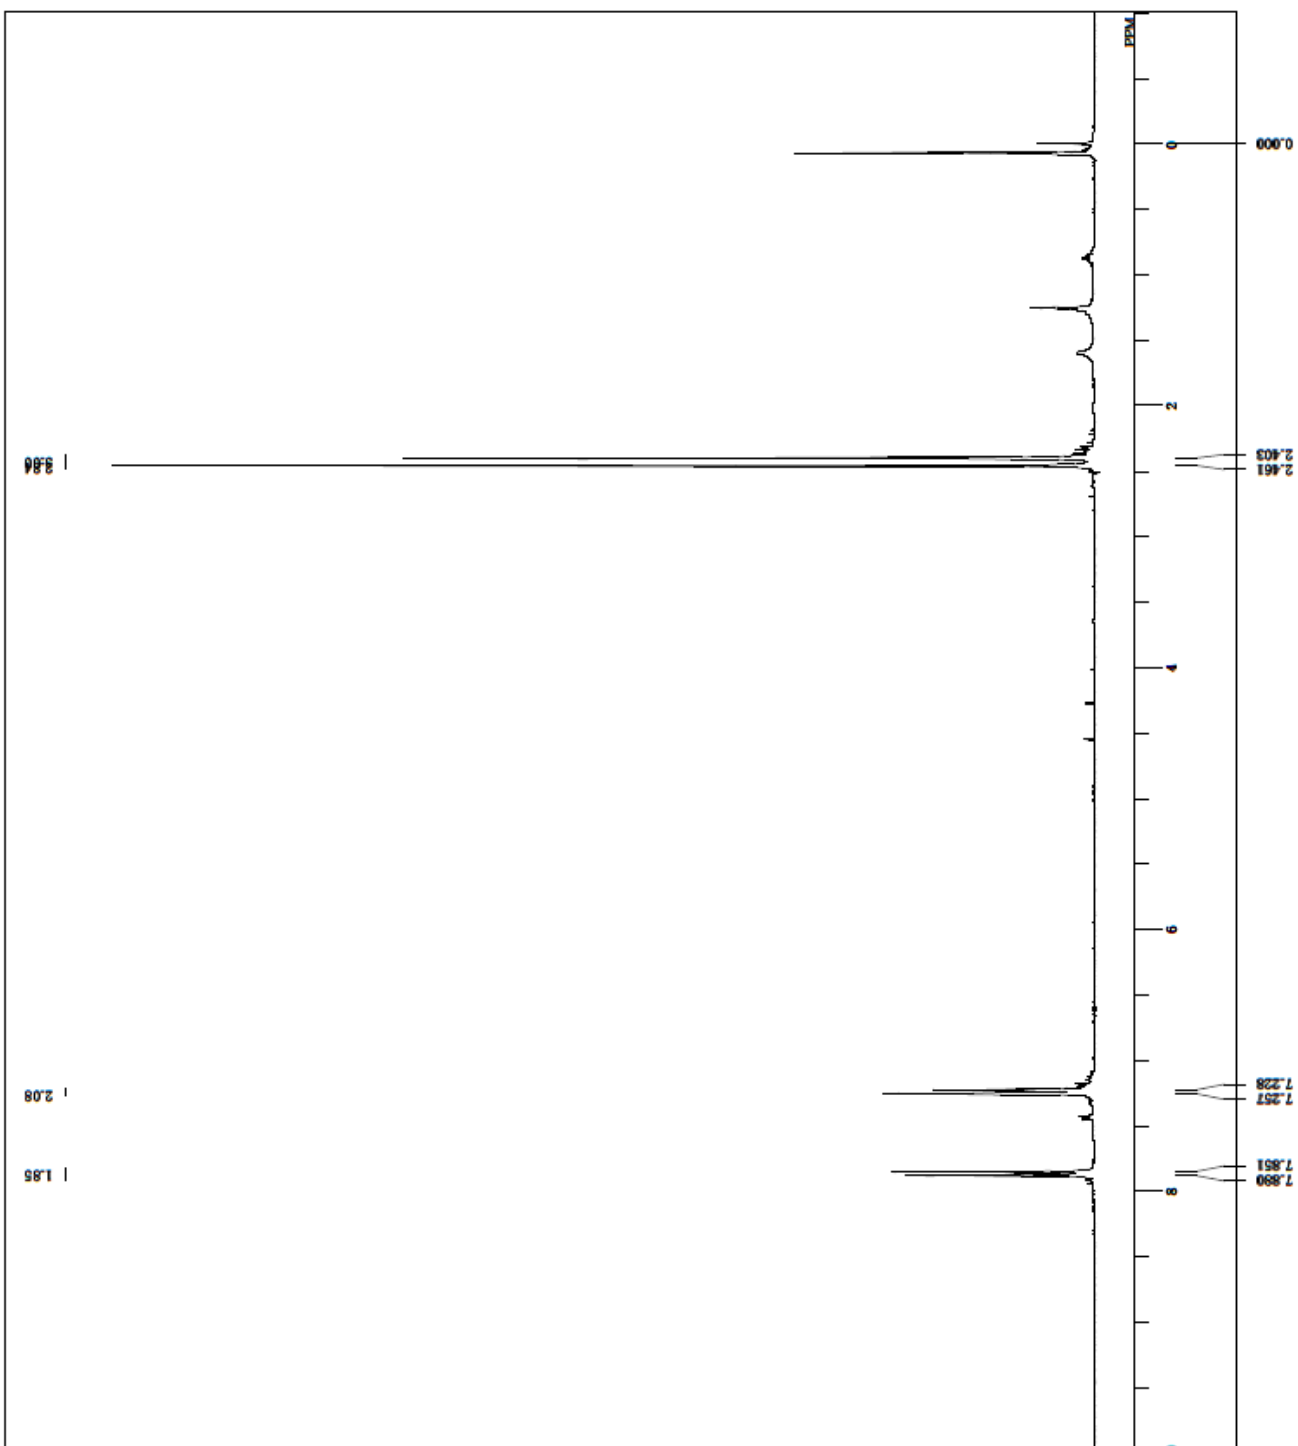

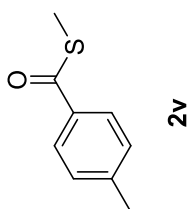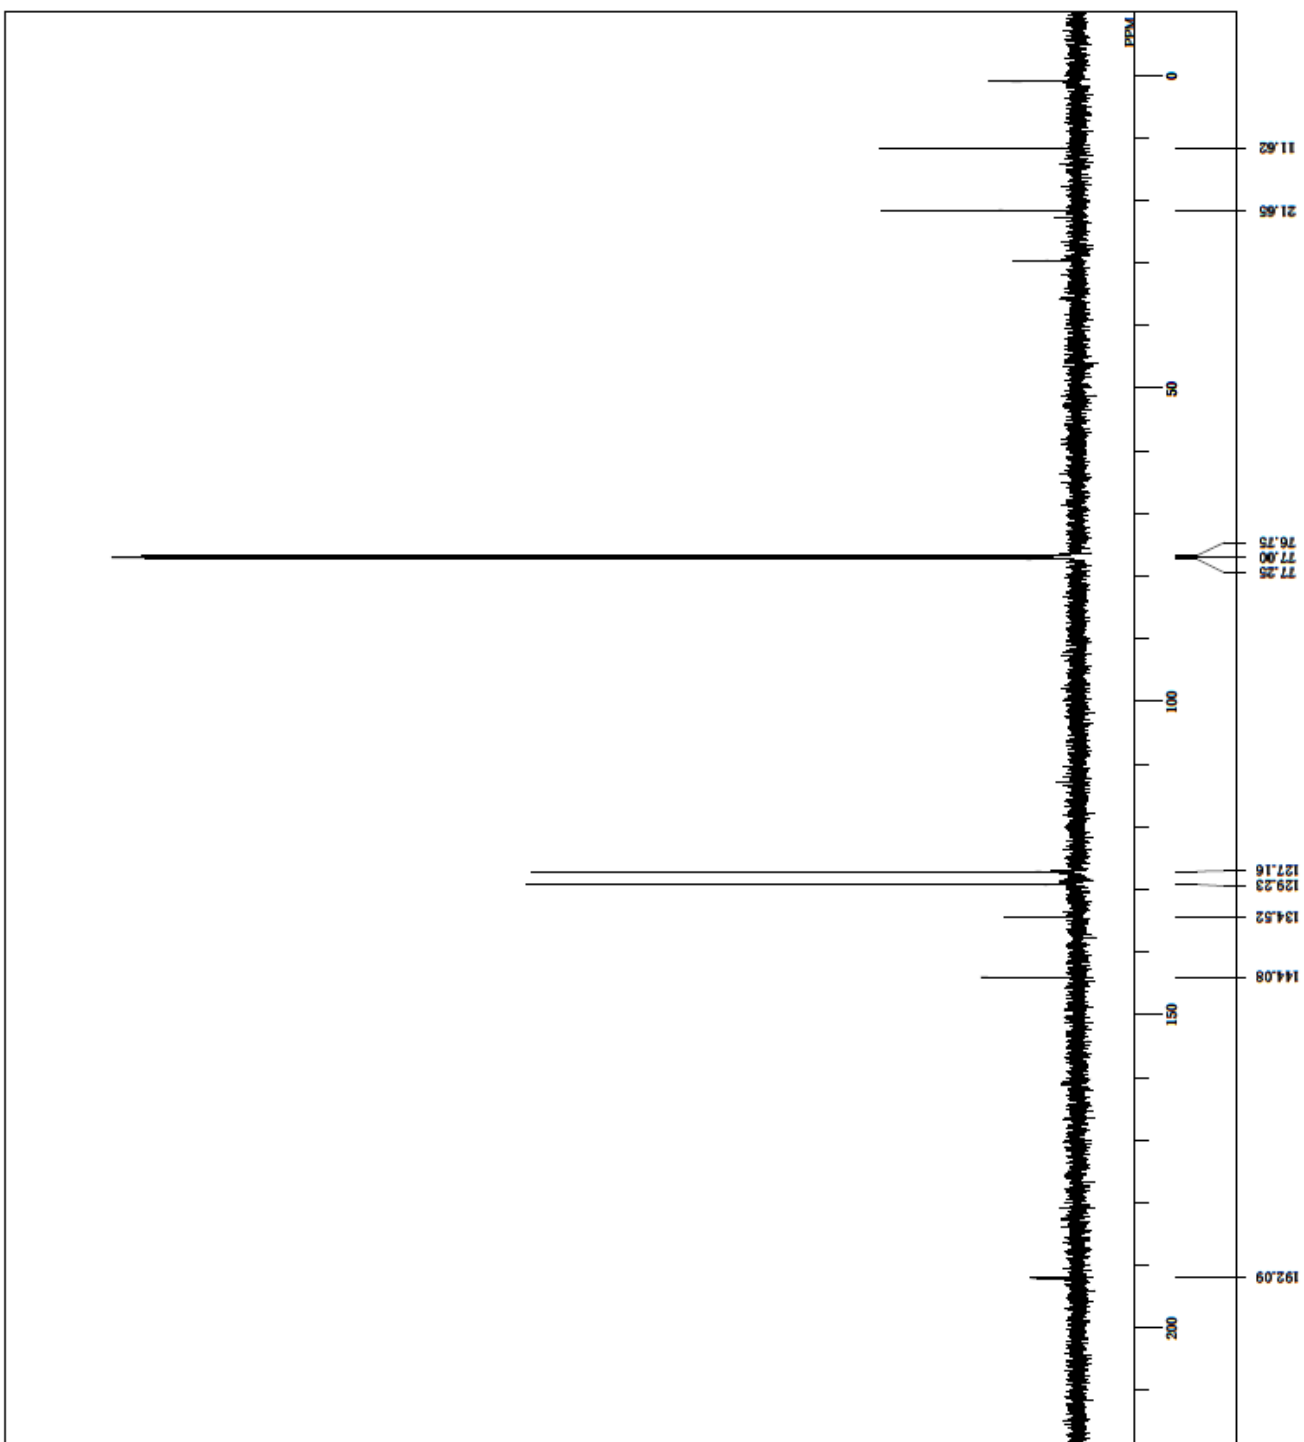

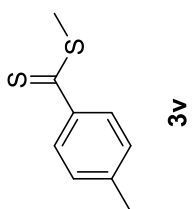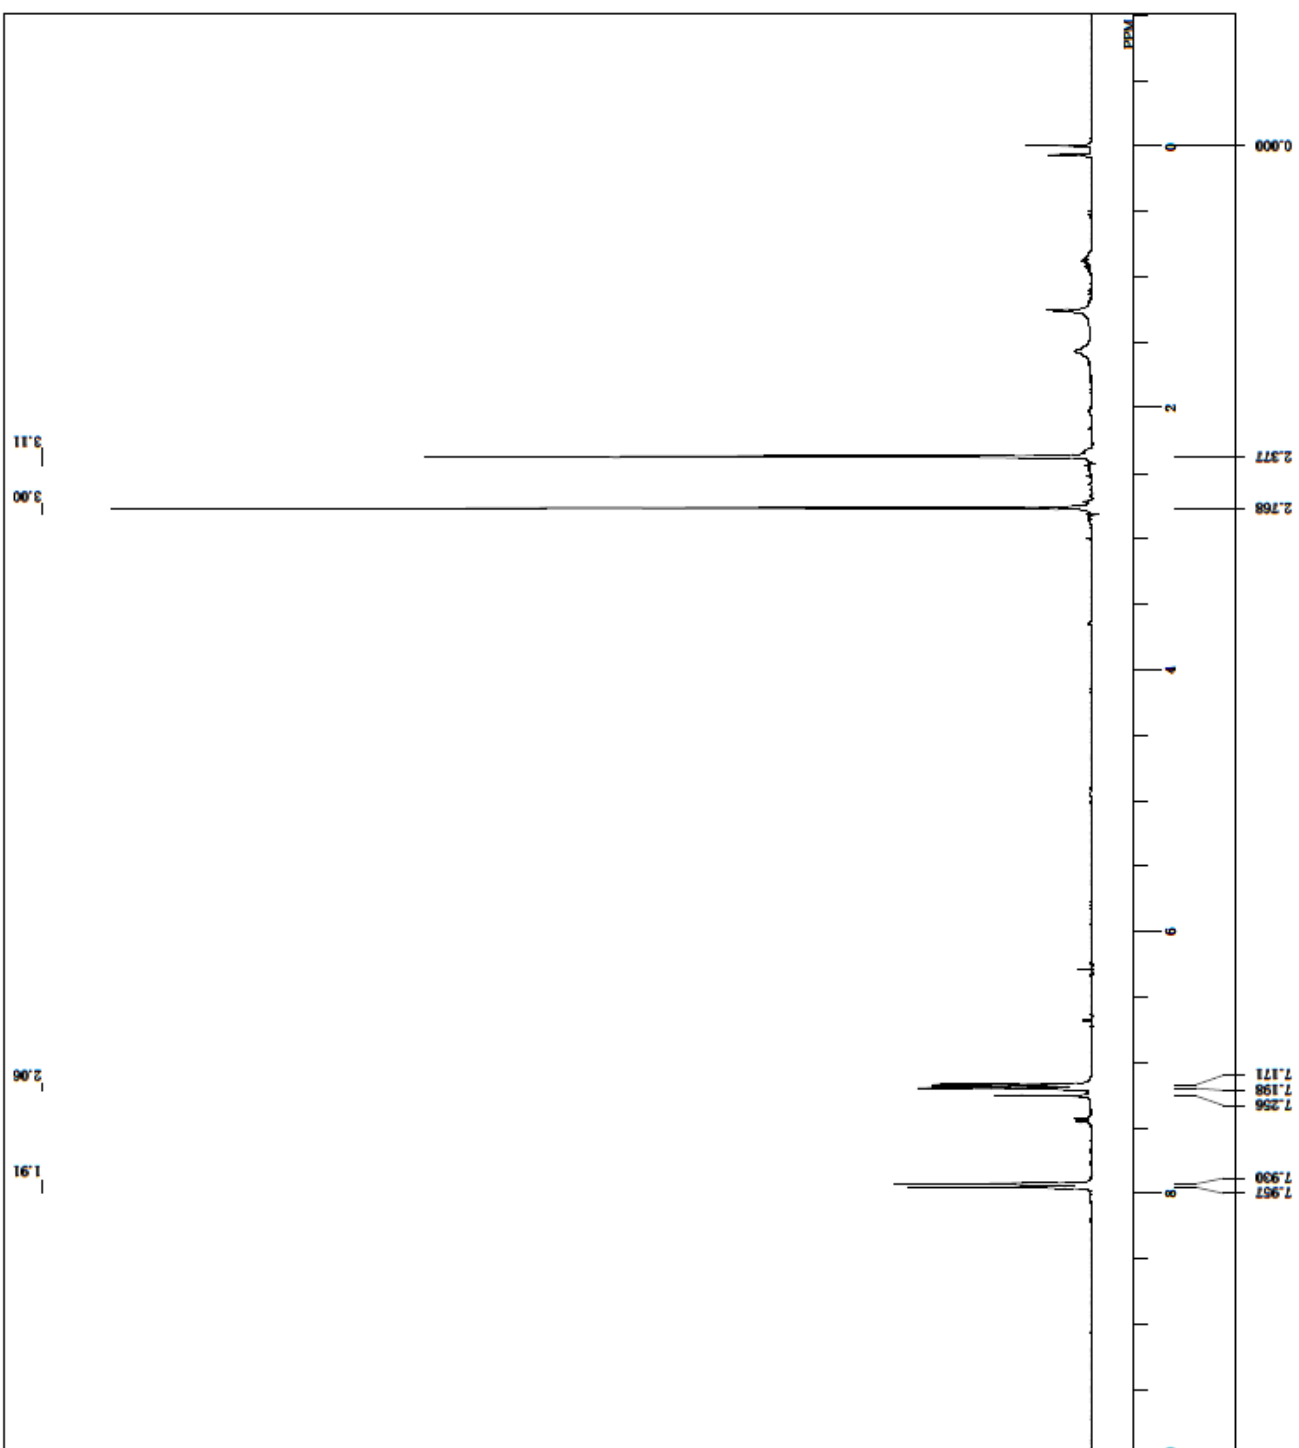

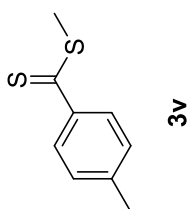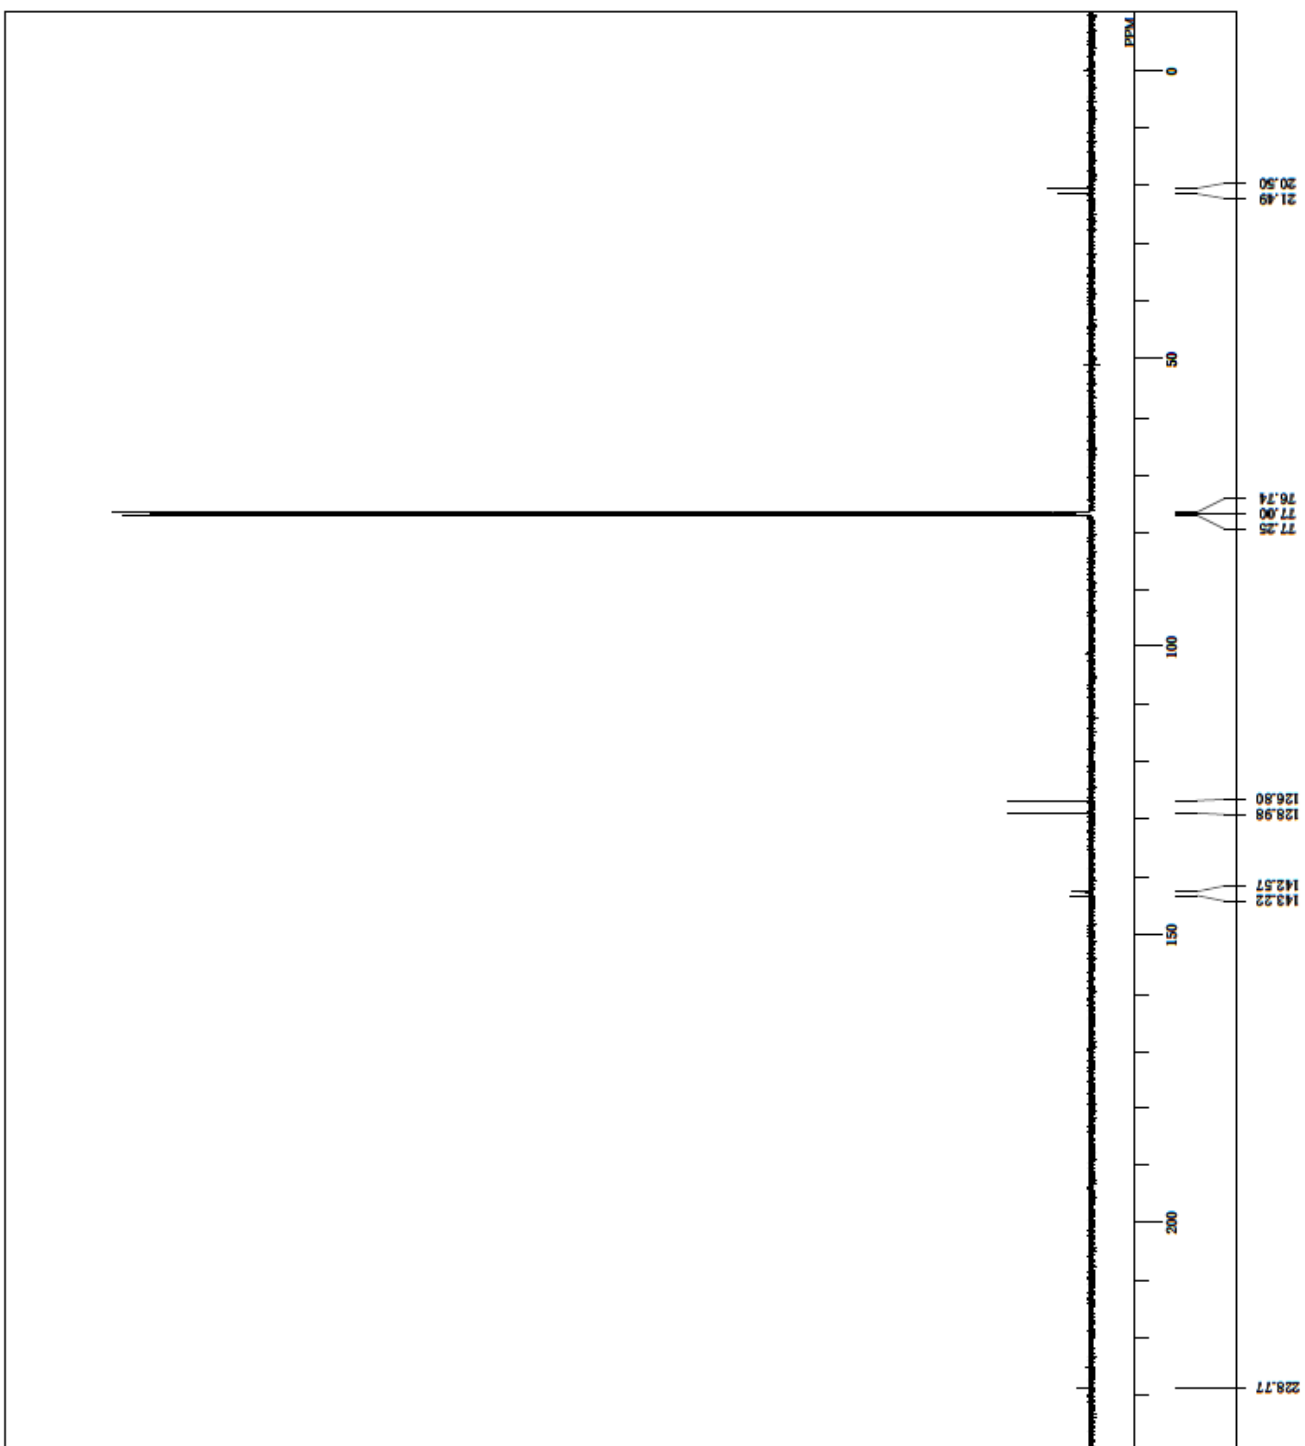

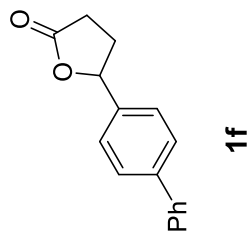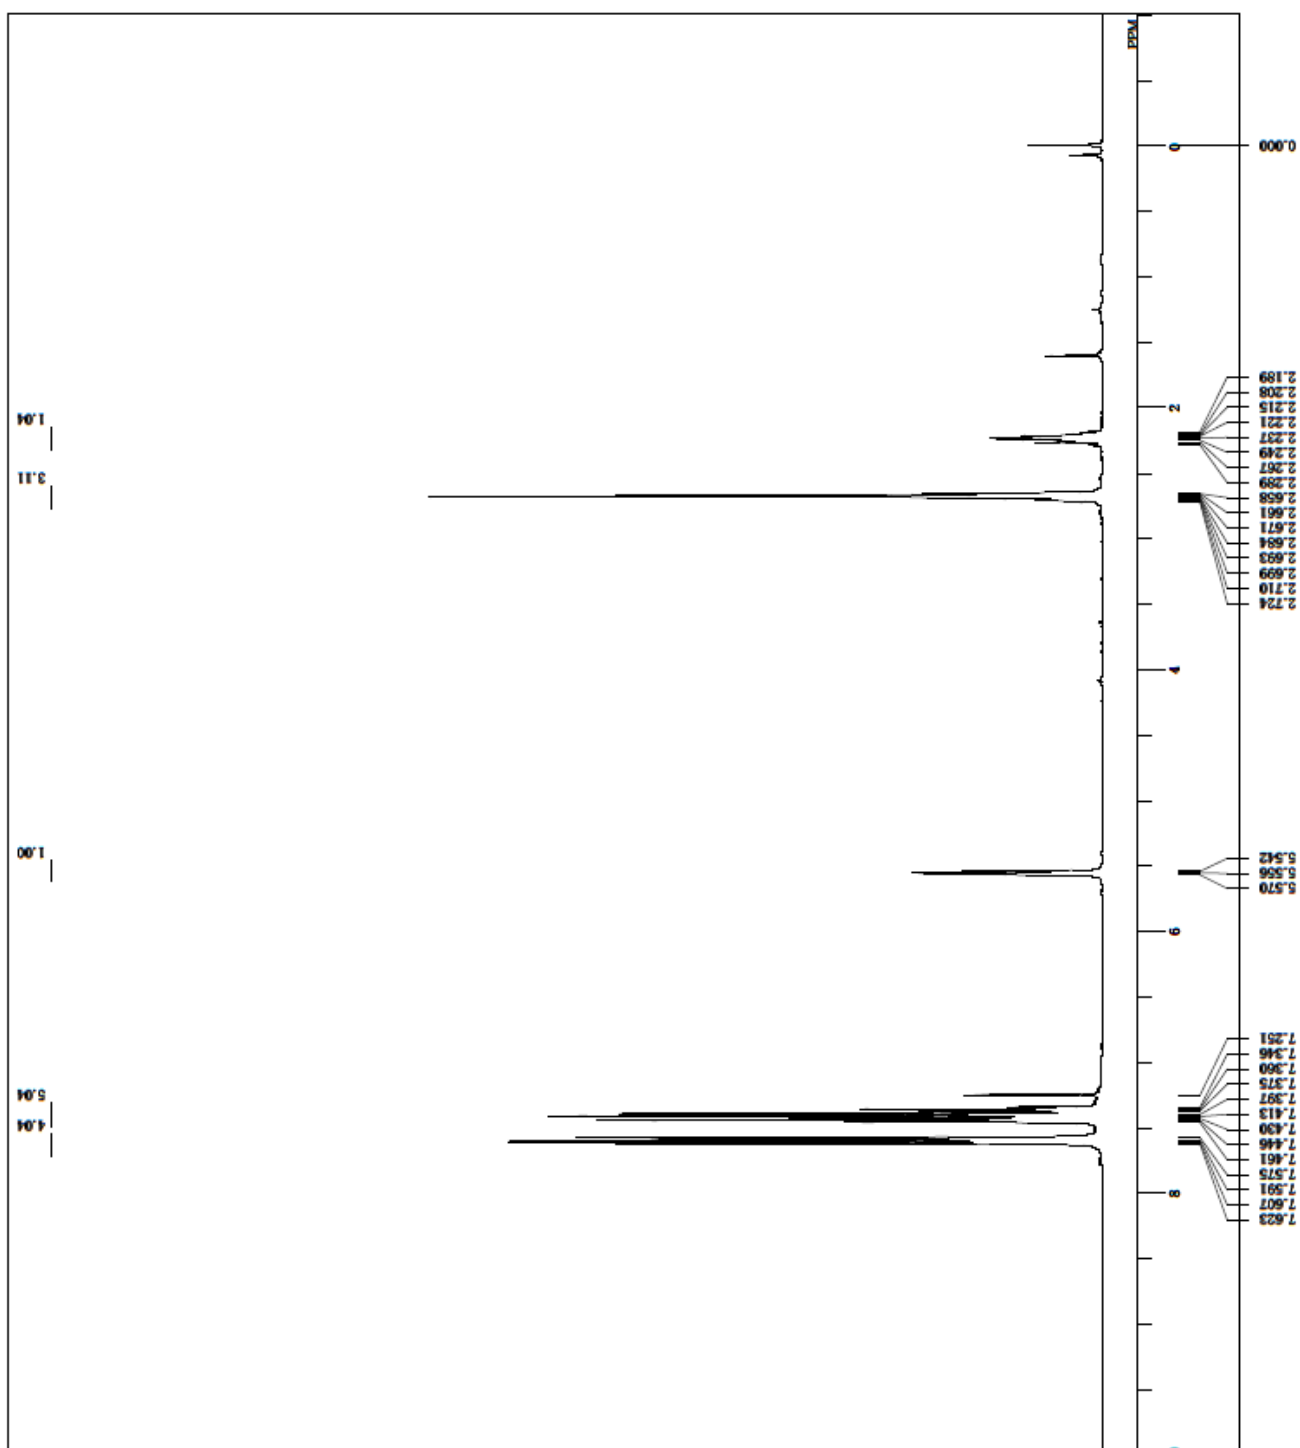

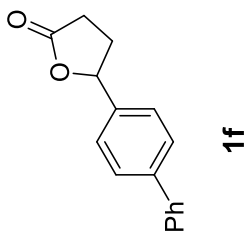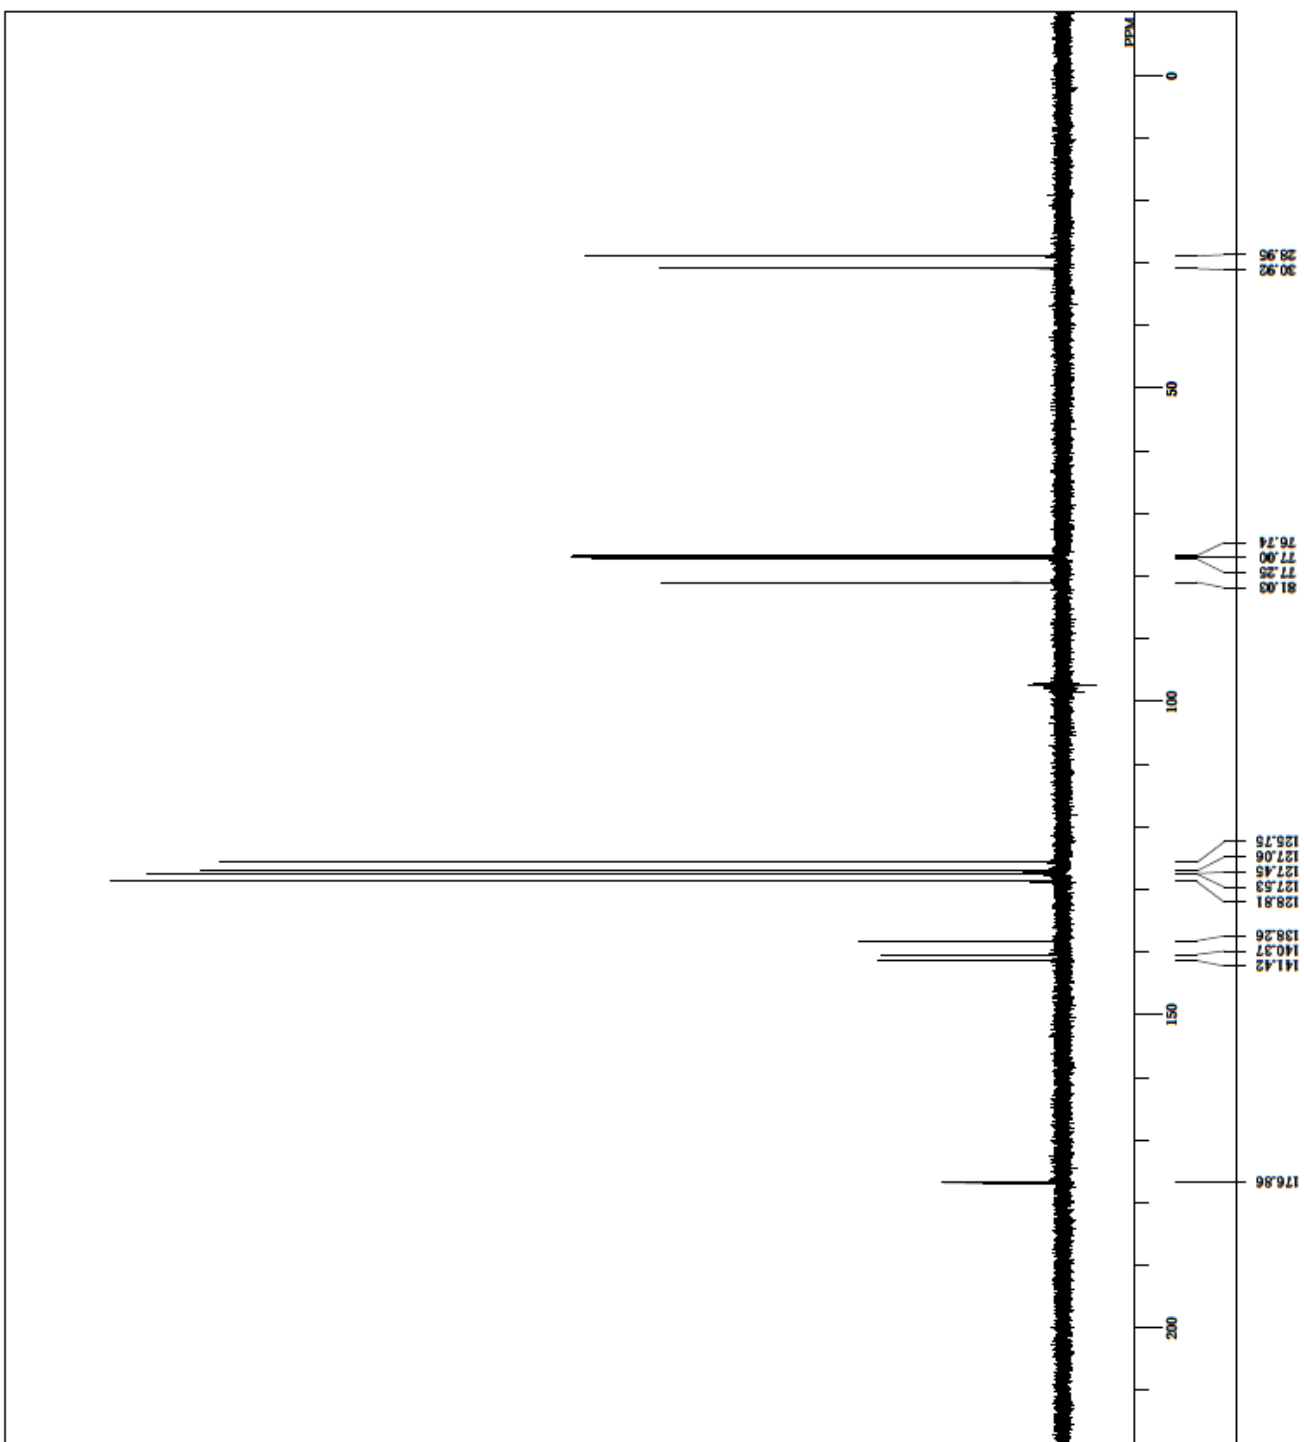

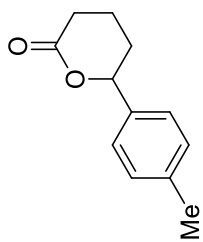

1r

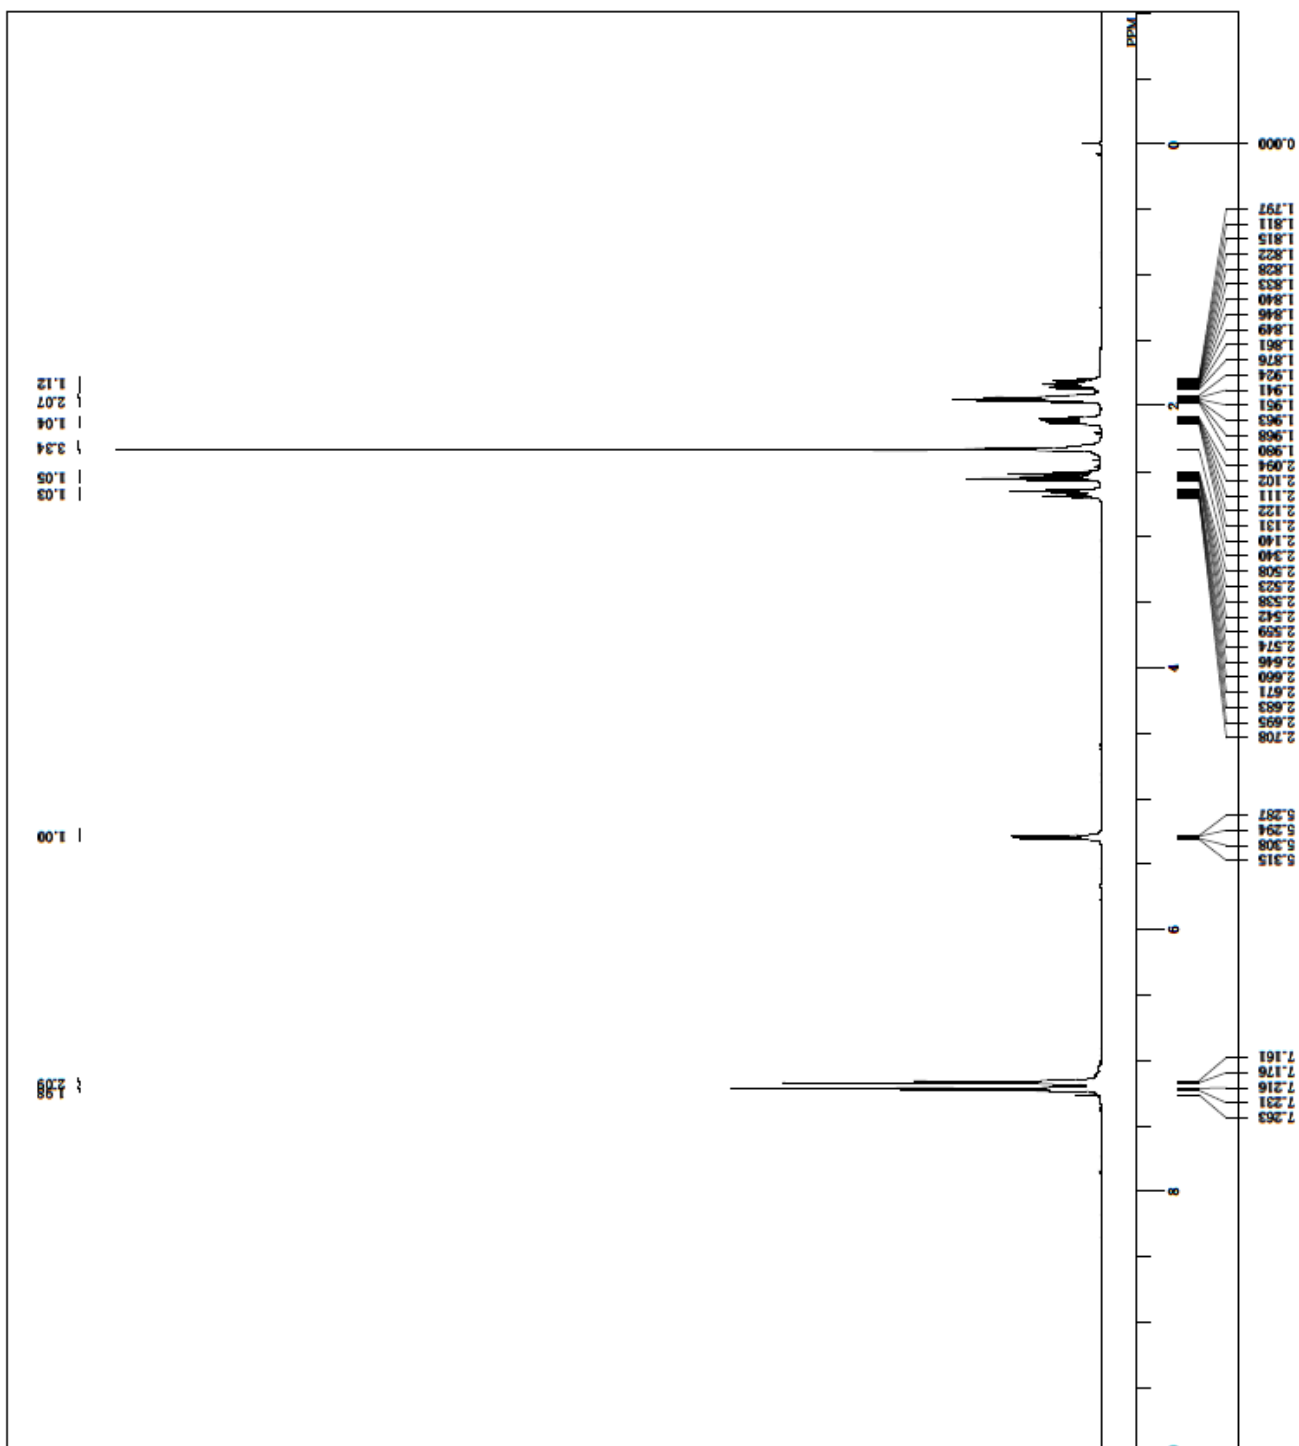





1r

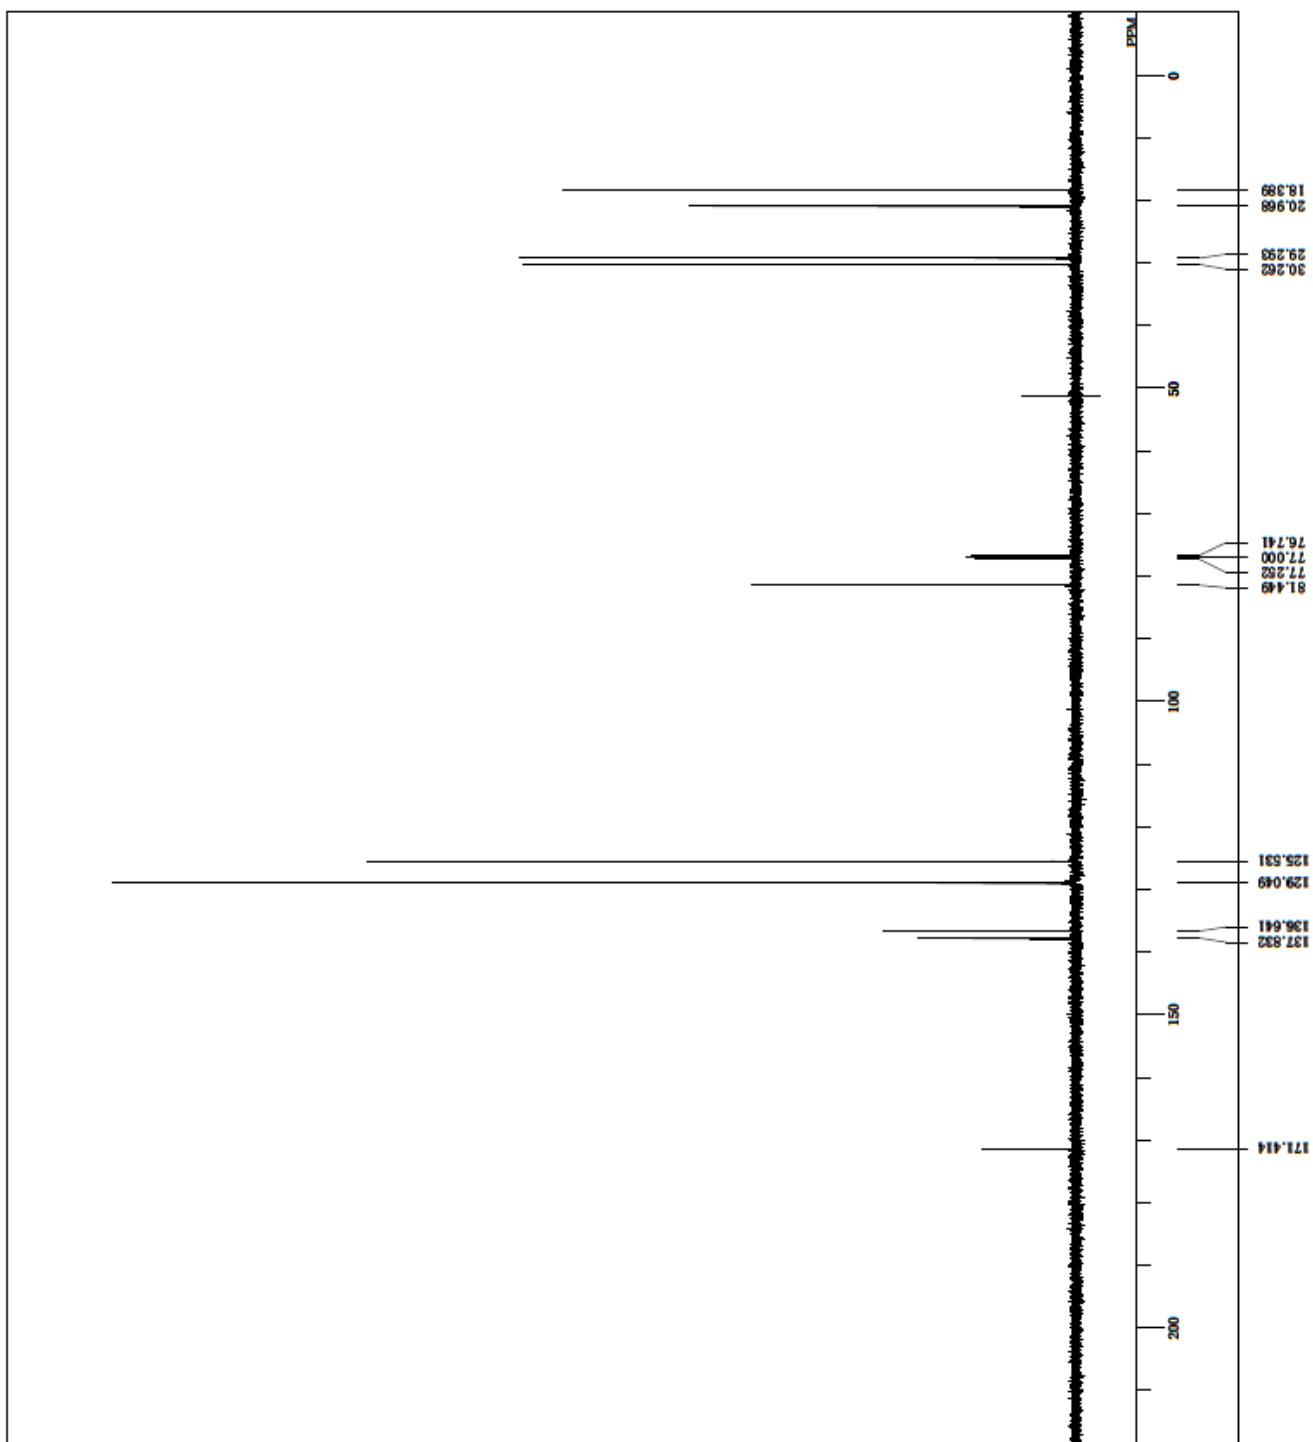

DFILE TKN-170-4-1H %\_sol\_000 Y.xls  
 COMINT Single Pulse Experiment  
 DATIM 17-04-2018 18:56:50  
 OBNUC 1H  
 EXMfOD single pulse exp  
 OBFRQ 500.16 MHz  
 OBSEI 2.41 kHz  
 OBFLN 6.01 Hz  
 POINT 16384  
 FREQU 7507.51 Hz  
 SCANS 8  
 ACQTM 2.1823 sec  
 PD 4.0000 sec  
 PW1 7.60 msec  
 IRNUC 21.2 c  
 CTEMP CDCL3  
 SLVT 0.00 ppm  
 EXREF BF  
 BF 0.14 Hz  
 RGAIN 13

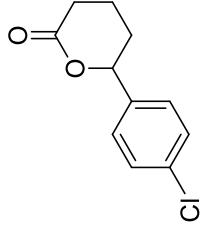

1s

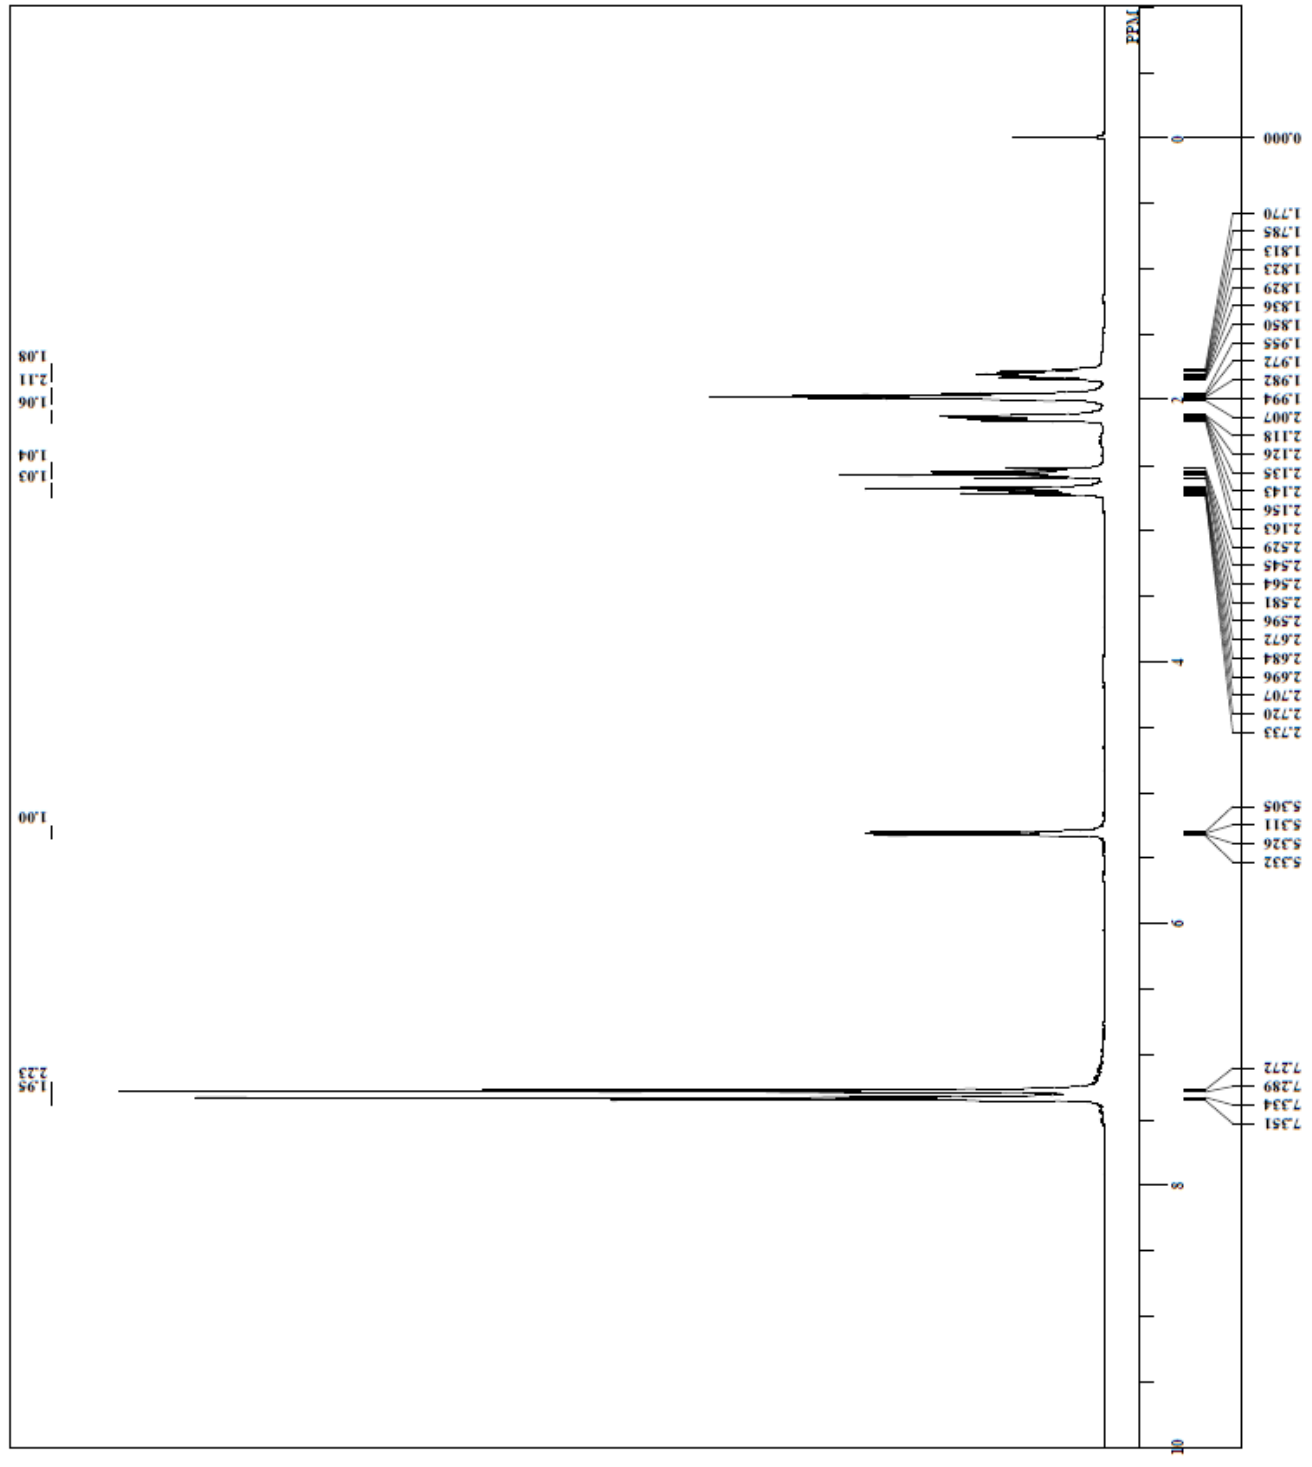

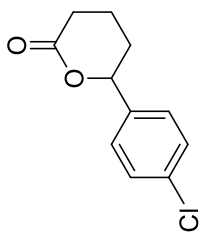

1s

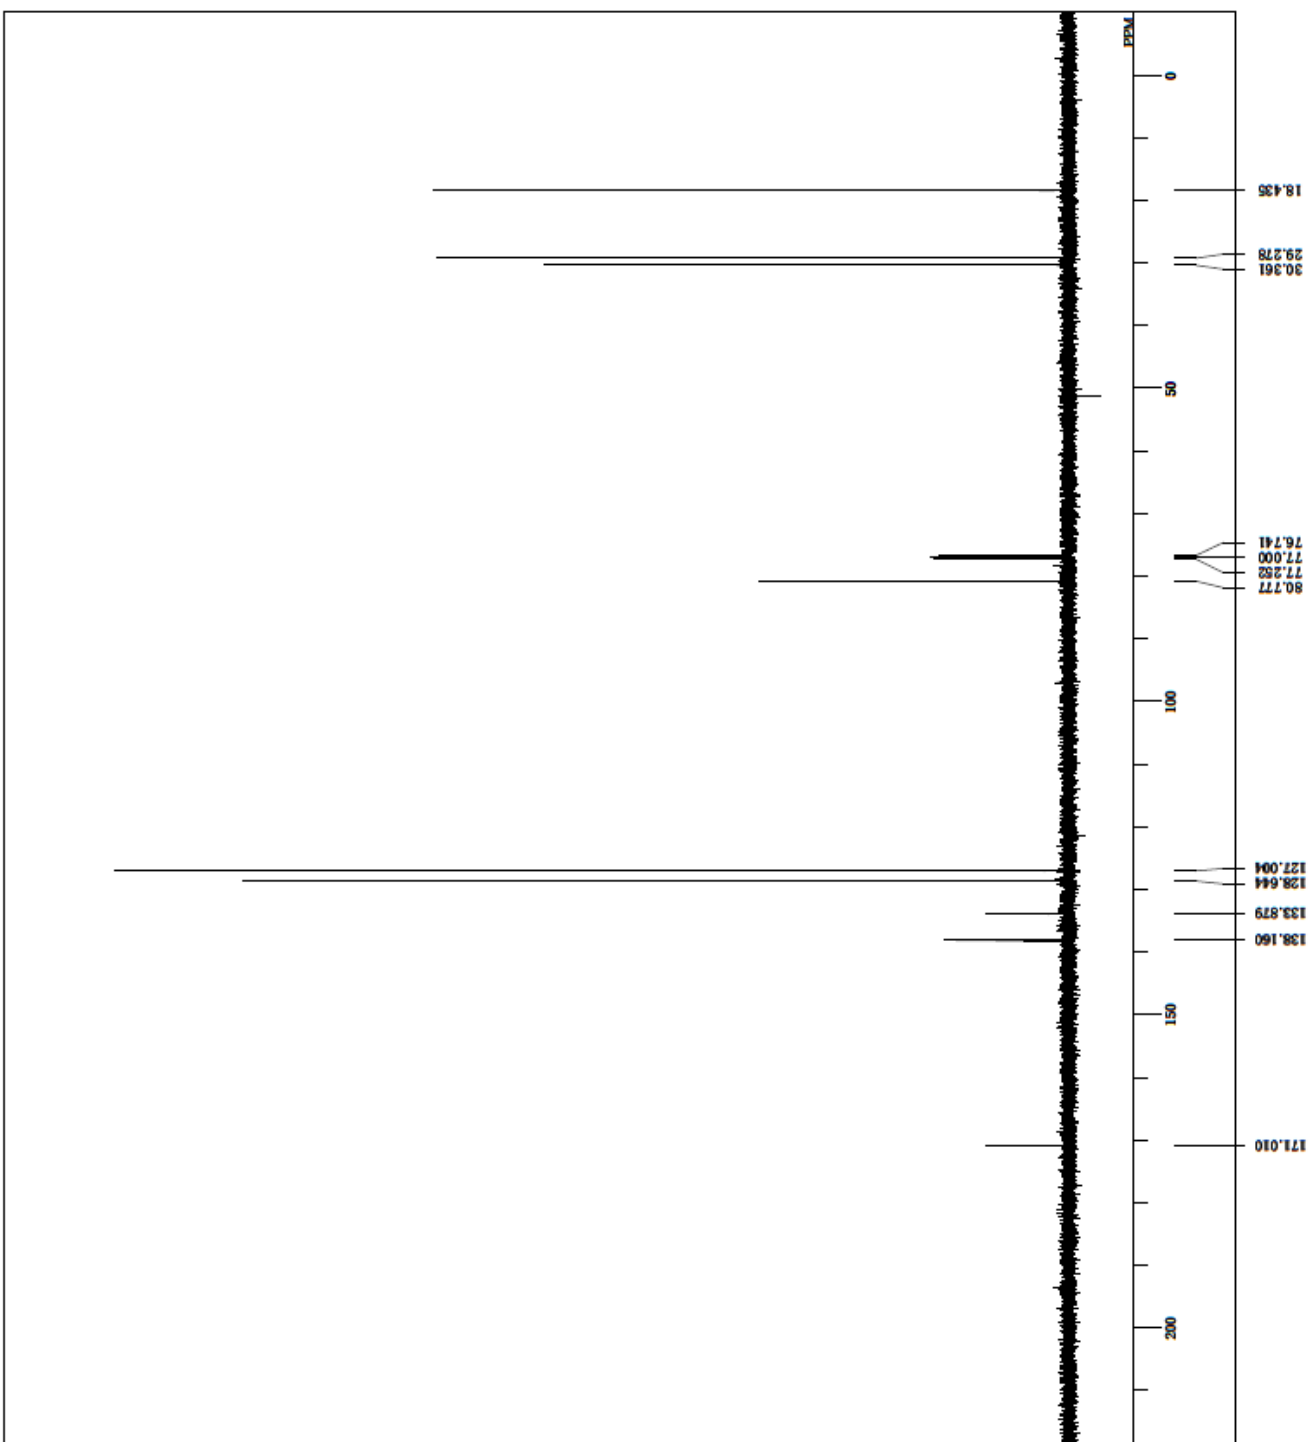

Supplement: Supplementary file 1 [file supplementary]
